# Supplementary material
Source: publisher figshare collection journal article supplement (https://acs.figshare.com/ndownloader/files/4600858)

*Supporting Information for***Asymmetric Mukaiyama Aldol Reaction of Nonactivated Ketones Catalyzed by *allo*-Threonine-Derived Oxazaborolidinone**

Shinya Adachi and Toshiro Harada\*

*Department of Chemistry and Materials Technology, Kyoto Institute of Technology, Matsugasaki, Sakyo-ku, Kyoto 606-8585, Japan*

**Table of Contents:**

|                                                                                                           |      |
|-----------------------------------------------------------------------------------------------------------|------|
| General                                                                                                   | S-2  |
| <i>S</i> - <i>tert</i> -Butyl ( <i>R</i> )-3-(4-Bromophenyl)-3-hydroxybutanethioate ( <b>4a</b> )         | S-2  |
| <i>(Typical Procedure for Asymmetric Aldol Reaction; Table 1, entry 9).</i>                               |      |
| Spectral Data of Products <b>5–7</b> and <b>4b–q</b>                                                      | S-3  |
| Absolute Structure Determination of <b>4b</b> and <b>4q</b>                                               | S-9  |
| <sup>1</sup> H and/or <sup>13</sup> C NMR Spectra of Products <b>5–7</b> , <b>4b–q</b> , and <b>11a,b</b> | S-11 |

**General.** Dichloromethane was dried and distilled over CaH<sub>2</sub>. Et<sub>2</sub>O and toluene was distilled from sodium benzophenone ketyl. The following compounds were prepared according to a literature procedure; ketone **2d**,<sup>1</sup> *O*-benzoyl-*N*-tosyl-(*L*)-*allo*-threonine,<sup>2</sup> and silyl ketene acetals **3a**<sup>3</sup>, **3b**<sup>4</sup>.

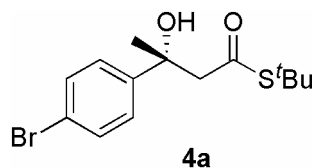

***S*-tert-Butyl (R)-3-(4-Bromophenyl)-3-hydroxybutanethioate (4a)** (Typical Procedure for Asymmetric Aldol Reaction; Table 1, entry 9). To a solution of *O*-benzoyl-*N*-tosyl-(*L*)-*allo*-threonine (75.5 mg, 0.200 mmol) in dry CH<sub>2</sub>Cl<sub>2</sub> (2.0 mL) under argon atmosphere at room temperature was added dichlorophenylborane (28.5 μL, 0.22 mmol). After being stirred for 30 min, the mixture was concentrated in vacuo. To a solution of the resulting OXB **1** in dry toluene (0.5 mL) at −10 °C were added *p*-bromoacetophenone (**2a**) (199 mg, 1.00 mmol) and silyl ketene acetal **3b** (306 mg, 1.50 mmol). After being stirred at −10 °C for 48 h, the reaction mixture was quenched by the addition of saturated aqueous NaHCO<sub>3</sub> and filtered. The filtrate was extracted three times with ethyl acetate, dried (Na<sub>2</sub>SO<sub>4</sub>), and concentrated in vacuo. The residue was dissolved in aqueous 1N HCl (10 mL) and THF (10 mL) at room temperature. After being for 3 h, the mixture was poured into aqueous NaHCO<sub>3</sub> and extracted three times with ethyl acetate. The organic layers were dried (Na<sub>2</sub>SO<sub>4</sub>) and concentrated in vacuo. Purification of the residue by flash chromatography (SiO<sub>2</sub>, 2% ethyl acetate in hexane) gave, in the order of elution, 225 mg (68%) of (*R*)-**4a** (94% ee) and 26.1 mg (13%) of **7** (44% ee). **4a**: [α]<sub>D</sub><sup>18</sup> 28.1 (*c* 1.05, CHCl<sub>3</sub>); <sup>1</sup>H NMR (500 MHz, CDCl<sub>3</sub>) δ 1.36 (9H, s), 1.50 (3H, s), 2.86 (1H, d, *J* = 15.5), 3.02 (1H, d, *J* = 15.4), 4.35 (1H, s), 7.29–7.32 (2H, m), 7.43–7.46 (2H, m); <sup>13</sup>C NMR (125.8 MHz, CDCl<sub>3</sub>) δ 29.5, 30.1, 49.0, 54.9, 73.9, 120.8, 126.6, 131.2, 145.6, 201.3. HRMS (EI) calcd for C<sub>14</sub>H<sub>19</sub>BrO<sub>2</sub>S 330.0289, found 330.0267. The ee value of **4a** was determined by HPLC analysis using a Chiralcel OD column (1 mL/min, 0.1% *i*-PrOH in hexane); retention times: 34.6 min (major *R*-enantiomer) and 42.6 min (minor *S*-enantiomer).

<sup>1</sup> Percec, V.; Bera, T. K.; De, B. B.; Sanai, Y.; Smith, J.; Holerca, M. N.; Barboiu, B. *J. Org. Chem.* **2001**, *66*, 2104–2117.

<sup>2</sup> Wang, X.; Adachi, S.; Iwai, H.; Takatsuki, H.; Fujita, K.; Kubo, M.; Oku, A.; Harada, T. *J. Org. Chem.* **2003**, *68*, 10046–10057.

<sup>3</sup> Kita, Y.; Segawa, J.; Haruta, J.; Yasuda, H.; Tamura, Y. *J. Chem. Soc., Perkin Trans. 1* **1982**, 1099–1104.

<sup>4</sup> Harada, T.; Adachi, S.; Wang, X. *Org. Lett.* **2004**, *6*, 4877–4879.

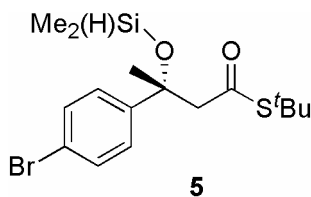

***S*-tert-Butyl (*R*)-3-(4-Bromophenyl)-3-dimethylsilyloxybutanethioate (5):**  $^1\text{H}$  NMR (500 MHz,  $\text{CDCl}_3$ )  $\delta$  0.15 (3H, d,  $J = 2.8$  Hz), 0.23 (3H, d,  $J = 2.8$  Hz), 1.36 (9H, s), 1.79 (3H, s), 2.81 (1H, d,  $J = 13.6$  Hz), 2.86 (1H, d,  $J = 13.6$  Hz), 4.71 (1H, sept,  $J = 2.8$  Hz), 7.25–7.29 (2H, m), 7.42–7.46 (2H, m);  $^{13}\text{C}$  NMR (125.8 MHz,  $\text{CDCl}_3$ )  $\delta$  0.2, 0.4, 27.7, 29.5, 48.0, 58.7, 76.1, 120.9, 127.1, 131.0, 145.8, 196.7; HRMS (EI) calcd for  $\text{C}_{16}\text{H}_{25}\text{BrO}_2\text{SSi}$  388.0528, found 388.0528. The ee value (91%; Table 1, entry 2) was determined after transforming (aqueous 1N HCl, THF, room temperature) to **4a** by HPLC analysis using a Chiralcel OD column.

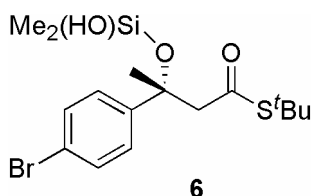

***S*-tert-Butyl (*R*)-3-(4-Bromophenyl)-3-(hydroxydimethylsilyloxy)butanethioate (6):**  $^1\text{H}$  NMR (500 MHz,  $\text{CDCl}_3$ )  $\delta$  0.18 (3H, s), 0.19 (3H, s), 1.35 (9H, s), 1.76 (3H, s), 2.91 (1H, d,  $J = 13.6$  Hz), 2.93 (1H, d,  $J = 13.6$  Hz), 3.15 (1H, s), 7.26–7.29 (2H, m), 7.43–7.46 (2H, m);  $^{13}\text{C}$  NMR (125.8 MHz,  $\text{CDCl}_3$ )  $\delta$  0.7, 0.9, 29.5, 29.7, 48.4, 58.4, 76.5, 120.8, 127.0, 131.0, 146.2, 198.4; FT-IR (liquid film) 3409 (br), 1668  $\text{cm}^{-1}$ ; HRMS (FAB/*m*-MBA + NaI) calcd for  $\text{C}_{16}\text{H}_{25}\text{BrNaO}_3\text{SSi}$  ( $\text{M} + \text{Na}^+$ ) 427.0375, found 427.0388. The ee value (90%; Table 1, entry 2) was determined after transforming (aqueous 1N HCl, THF, room temperature) to **4a** by HPLC analysis using a Chiralcel OD column.

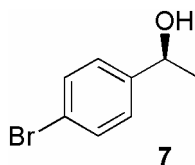

**(*S*)-1-(4-Bromophenyl)ethanol (7):**<sup>5</sup>  $[\alpha]_{\text{D}}^{21} -20.6$  ( $c$  1.07, MeOH) (44% ee), lit.<sup>5</sup>  $[\alpha]_{\text{D}}^{21} 32.9$  ( $c$  1.39, MeOH) for >99% ee, *R* enantiomer;  $^1\text{H}$  NMR (500 MHz,  $\text{CDCl}_3$ )  $\delta$  1.46 (3H, d,  $J = 6.5$  Hz), 2.01 (1H, br s), 4.85 (1H, q,  $J = 6.5$  Hz), 7.22–7.25 (2H, m), 7.45–7.47 (2H, m);  $^{13}\text{C}$  NMR (125.8 MHz,  $\text{CDCl}_3$ )  $\delta$  25.2, 69.7, 121.1, 127.1, 131.5, 144.7. The ee value was determined by GC analysis using a BETA DEX<sup>TM</sup>

<sup>5</sup> Mathre, D. J.; Thompson, A. S.; Douglas, A. W.; Hoogsteen, K.; Carroll, J. D.; Corley, E. G.; Grabowski, E. J. J. *J. Org. Chem.* **1993**, 58, 2880–2888.

225 (m) column (30 m, 1.8 kg/cm<sup>2</sup>, initial temperature 80 °C, 2 °C/min ramp to 200 °C); retention times: 39.0 min (minor *R*-enantiomer) and 39.4 min (major *S*-enantiomer).

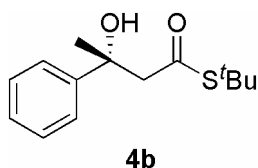

***S*-tert-Butyl (*R*)-3-Hydroxy-3-phenylbutanethioate (4b):**  $[\alpha]_{\text{D}}^{18}$  31.3 (*c* 1.31, CHCl<sub>3</sub>) (91% ee); <sup>1</sup>H NMR (500 MHz, CDCl<sub>3</sub>)  $\delta$  1.35 (9H, s), 1.54 (3H, s), 2.88 (1H, d, *J* = 15.3 Hz), 3.06 (1H, d, *J* = 15.3 Hz), 4.30 (1H, s), 7.22 (1H, br t, *J* = 7.3 Hz), 7.31–7.34 (2H, m), 7.43–7.45 (2H, m); <sup>13</sup>C NMR (125.8 MHz, CDCl<sub>3</sub>)  $\delta$  29.5, 30.1, 48.7, 55.3, 74.0, 124.6, 126.7, 128.1, 146.4, 201.3. HRMS (EI) calcd for C<sub>14</sub>H<sub>20</sub>O<sub>2</sub>S 252.1184, found 252.1187. Anal. calcd for C<sub>14</sub>H<sub>20</sub>O<sub>2</sub>S: C, 66.63; H, 7.99. Found: C, 66.24; H, 8.32. The ee value was determined by HPLC analysis using a Chiralcel OD column (1 mL/min, 0.1%, *i*-PrOH in hexane); retention times: 17.6 min (major *R*-enantiomer) and 21.6 min (minor *S*-enantiomer). The absolute stereochemistry was determined by correlation (*vide infra*).

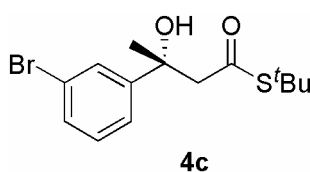

***S*-tert-Butyl (*R*)-3-(3-Bromophenyl)-3-hydroxybutanethioate (4c):**  $[\alpha]_{\text{D}}^{18}$  34.8 (*c* 1.72, CHCl<sub>3</sub>) (91% ee); <sup>1</sup>H NMR (500 MHz, CDCl<sub>3</sub>)  $\delta$  1.36 (9H, s), 1.51 (3H, s), 2.85 (1H, d, *J* = 15.4 Hz), 3.01 (1H, d, *J* = 15.4 Hz), 4.36 (1H, s), 7.19 (1H, t, *J* = 4.1 Hz), 7.33–7.37 (2H, m), 7.61 (1H, t, *J* = 1.9 Hz); <sup>13</sup>C NMR (125.8 MHz, CDCl<sub>3</sub>)  $\delta$  29.5, 30.0, 49.0, 54.9, 73.8, 122.5, 123.3, 128.1, 129.7, 129.9, 148.9, 201.2; HRMS (EI) calcd for C<sub>14</sub>H<sub>19</sub>BrO<sub>2</sub>S 330.0289, found 330.0286. The ee value was determined by HPLC analysis using a Chiralpak AD-H column (1 mL/min, 0.5%, *i*-PrOH in hexane); retention times: 21.9 min (minor *S*-enantiomer) and 23.0 min (major *R*-enantiomer). The absolute stereochemistry was assumed by analogy.

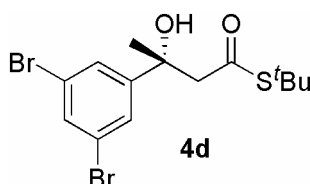

***S*-tert-Butyl (*R*)-3-(3,5-Dibromophenyl)-3-hydroxybutanethioate (4d):**  $[\alpha]_{\text{D}}^{16}$  39.8 (*c* 1.02, CHCl<sub>3</sub>) (94% ee); <sup>1</sup>H NMR (500 MHz, CDCl<sub>3</sub>)  $\delta$  1.38 (9H, s), 1.50 (3H, s), 2.84 (1H, d, *J* = 15.4 Hz), 2.98 (1H, d, *J* = 15.4 Hz), 4.40 (1H, s), 7.52 (2H, d, *J* = 1.7 Hz), 7.54 (1H, t, *J* = 1.7 Hz); <sup>13</sup>C NMR (125.8 MHz, CDCl<sub>3</sub>)  $\delta$  29.5, 29.9, 49.3, 54.6, 73.6, 122.9, 127.0, 132.5, 150.6, 201.1; HRMS (EI) calcd for

$C_{14}H_{18}Br_2O_2S$  409.9374, found 409.9374. The ee value was determined by HPLC analysis using a Chiralpak AD-H column (1 mL/min, 0.5%, *i*-PrOH in hexane); retention times: 11.7 min (major *R*-enantiomer) and 16.6 min (minor *S*-enantiomer). The absolute stereochemistry was assumed by analogy.

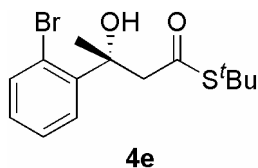

***S*-tert-Butyl (*R*)-3-(2-Bromophenyl)-3-hydroxybutanethioate (4e):**  $[\alpha]_D^{16}$  100.7 (*c* 1.06,  $CHCl_3$ ) (92% ee);  $^1H$  NMR (500 MHz,  $CDCl_3$ )  $\delta$  1.29 (9H, s), 1.62 (3H, s), 3.00 (1H, d,  $J = 15.1$  Hz), 3.78 (1H, d,  $J = 15.1$  Hz), 4.66 (1H, s), 7.08 (1H, dt,  $J = 1.6$  and 7.6 Hz), 7.29 (1H, dd,  $J = 1.2$  and 8.3 Hz), 7.56 (1H, dd,  $J = 1.2$  and 7.9 Hz), 7.83 (1H, dd,  $J = 1.7$  and 8.0 Hz);  $^{13}C$  NMR (125.8 MHz,  $CDCl_3$ )  $\delta$  26.9, 29.4, 48.6, 52.0, 74.8, 119.9, 127.4, 128.4, 128.7, 134.8, 144.0, 201.8; HRMS (FAB/*m*-NBA) calcd for  $C_{14}H_{20}BrO_2S$  ( $M+H^+$ ) 331.0367, found 331.0372. The ee value was determined by HPLC analysis using a Chiralpak AD-H column (1 mL/min, 0.5%, *i*-PrOH in hexane); retention times: 17.2 min (major *R*-enantiomer) and 20.8 min (minor *S*-enantiomer). The absolute stereochemistry was assumed by analogy.

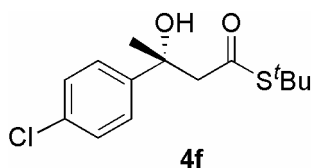

***S*-tert-Butyl (*R*)-3-(4-Chlorophenyl)-3-hydroxybutanethioate (4f):**  $[\alpha]_D^{18}$  23.5 (*c* 1.09,  $CHCl_3$ ) (93% ee);  $^1H$  NMR (500 MHz,  $CDCl_3$ )  $\delta$  1.35 (9H, s), 1.50 (3H, s), 2.85 (1H, d,  $J = 15.4$  Hz), 3.02 (1H, d,  $J = 15.4$  Hz), 4.35 (1H, s), 7.27–7.30 (2H, m), 7.35–7.38 (2H, m);  $^{13}C$  NMR (125.8 MHz,  $CDCl_3$ )  $\delta$  29.5, 30.1, 48.9, 55.0, 73.8, 126.2, 128.2, 132.6, 145.1, 201.2; HRMS (EI) calcd for  $C_{14}H_{19}ClO_2S$  286.0794, found 286.0781. The ee value was determined by HPLC analysis using a Chiralpak AD-H column (1 mL/min, 0.5%, *i*-PrOH in hexane); retention times: 23.1 min (minor *S*-enantiomer) and 30.8 min (major *R*-enantiomer). The absolute stereochemistry was assumed by analogy.

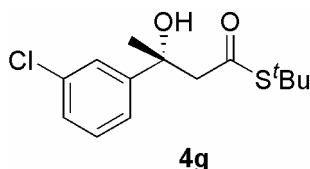

***S*-tert-Butyl (*R*)-3-(3-Chlorophenyl)-3-hydroxybutanethioate (4g):**  $[\alpha]_D^{18}$  26.1 (*c* 1.00,  $CHCl_3$ ) (95% ee);  $^1H$  NMR (500 MHz,  $CDCl_3$ )  $\delta$  1.36 (9H, s), 1.51 (3H, s), 2.85 (1H, d,  $J = 15.4$  Hz), 3.01 (1H, d,  $J = 15.4$  Hz), 4.36 (1H, s), 7.18–7.30 (3H, m), 7.45 (1H, t,  $J = 1.9$  Hz);  $^{13}C$  NMR (125.8 MHz,  $CDCl_3$ )  $\delta$  29.4, 30.0, 49.0, 54.9, 73.8, 122.9, 125.2, 127.0, 129.4, 134.1, 148.6, 201.2; HRMS (EI) calcd for

C<sub>14</sub>H<sub>19</sub>ClO<sub>2</sub>S 286.0794, found 286.0801. The ee value was determined by HPLC analysis using a Chiralpak AD-H column (1 mL/min, 0.5%, *i*-PrOH in hexane); retention times: 17.7 min (minor *S*-enantiomer) and 22.6 min (major *R*-enantiomer). The absolute stereochemistry was assumed by analogy.

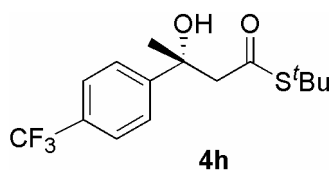

***S*-tert-Butyl (*R*)-3-(4-Trifluoromethylphenyl)-3-hydroxybutanethioate (4h):**  $[\alpha]_{\text{D}}^{18}$  28.7 (*c* 1.15, CHCl<sub>3</sub>) (92% ee); <sup>1</sup>H NMR (500 MHz, CDCl<sub>3</sub>)  $\delta$  1.34 (9H, s), 1.53 (3H, s), 2.90 (1H, d, *J* = 15.5 Hz), 3.06 (1H, d, *J* = 15.5 Hz), 4.43 (1H, s), 7.55–7.60 (4H, m); <sup>13</sup>C NMR (125.8 MHz, CDCl<sub>3</sub>)  $\delta$  29.4, 30.1, 49.0, 54.8, 74.0, 124.2 (q, *J* = 272 Hz), 125.1 (q, *J* = 4 Hz), 125.2, 129.1 (q, *J* = 32 Hz), 150.5, 201.2; HRMS (EI) calcd for C<sub>15</sub>H<sub>19</sub>F<sub>3</sub>O<sub>2</sub>S 320.1058, found 320.1051. The ee value was determined by HPLC analysis using a Chiralpak AD-H column (1 mL/min, 0.5%, *i*-PrOH in hexane); retention times: 20.4 min (minor *S*-enantiomer) and 23.0 min (major *R*-enantiomer). The absolute stereochemistry was assumed by analogy.

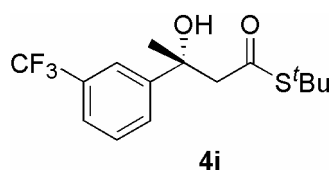

***S*-tert-Butyl (*R*)-3-(3-Trifluoromethylphenyl)-3-hydroxybutanethioate (4i):**  $[\alpha]_{\text{D}}^{13}$  20.4 (*c* 1.01, CHCl<sub>3</sub>) (94% ee); <sup>1</sup>H NMR (500 MHz, CDCl<sub>3</sub>)  $\delta$  1.32 (9H, s), 1.54 (3H, s), 2.88 (1H, d, *J* = 15.3 Hz), 3.05 (1H, d, *J* = 15.3 Hz), 4.45 (1H, s), 7.44 (1H, br t, *J* = 7.7 Hz), 7.49 (1H, br d, *J* = 7.8 Hz), 7.62 (1H, br d, *J* = 7.7 Hz), 7.72 (1H, br s); <sup>13</sup>C NMR (125.8 MHz, CDCl<sub>3</sub>)  $\delta$  29.3, 30.0, 48.9, 54.9, 73.9, 121.7 (q, *J* = 4 Hz), 123.7 (q, *J* = 4 Hz), 124.2 (q, *J* = 272 Hz), 128.2, 128.6, 130.4 (q, *J* = 32 Hz), 147.6, 201.2; HRMS (EI) calcd for C<sub>15</sub>H<sub>19</sub>F<sub>3</sub>O<sub>2</sub>S 320.1058, found 320.1054. The ee value was determined by HPLC analysis using a Chiralpak AD-H column (1 mL/min, 0.5%, *i*-PrOH in hexane); retention times: 11.4 min (major *R*-enantiomer) and 14.6 min (minor *S*-enantiomer). The absolute stereochemistry was assumed by analogy.

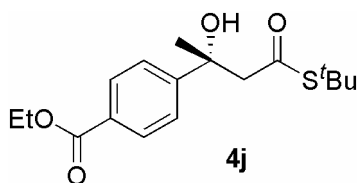

***S*-tert-Butyl (*R*)-3-(4-Ethoxycarbonylphenyl)-3-hydroxybutanethioate (4j):**  $[\alpha]_{\text{D}}^{21}$  17.0 (*c* 1.05, CHCl<sub>3</sub>) (94% ee); <sup>1</sup>H NMR (500 MHz, CDCl<sub>3</sub>)  $\delta$  1.34 (9H, s), 1.39 (3H, t, *J* = 7.1 Hz), 1.52 (3H, s), 2.90

(1H, d,  $J = 15.5$  Hz), 3.08 (1H, d,  $J = 15.5$  Hz), 4.37 (2H, q,  $J = 7.1$  Hz), 4.41 (1H, s), 7.49–7.51 (2H, m), 7.99–8.01 (2H, m);  $^{13}\text{C}$  NMR (125.8 MHz,  $\text{CDCl}_3$ )  $\delta$  14.3, 29.5, 30.1, 49.0, 54.8, 60.8, 74.1, 124.7, 129.0, 129.5, 151.5, 166.5, 201.2; HRMS (FAB/ $m$ -NBA) calcd for  $\text{C}_{17}\text{H}_{25}\text{O}_4\text{S}$  ( $\text{M}+\text{H}^+$ ) 325.1474, found 325.1466. The ee value was determined by HPLC analysis using a Chiralpak AD-H column (1 mL/min, 4%,  $i$ -PrOH in hexane); retention times: 17.0 min (minor  $S$ -enantiomer) and 18.6 min (major  $R$ -enantiomer). The absolute stereochemistry was assumed by analogy.

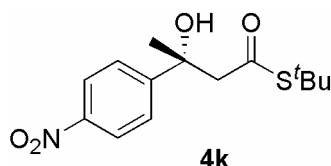

***S*-tert-Butyl (*R*)-3-Hydroxy-3-(4-nitrophenyl)butanethioate (4k):**  $[\alpha]_{\text{D}}^{18}$  31.0 ( $c$  1.89,  $\text{CHCl}_3$ ) (98% ee);  $^1\text{H}$  NMR (500 MHz,  $\text{CDCl}_3$ )  $\delta$  1.34 (9H, s), 1.53 (3H, s), 2.92 (1H, d,  $J = 15.6$  Hz), 3.08 (1H, d,  $J = 15.6$  Hz), 4.52 (1H, s), 7.59–7.63 (2H, m), 8.17–8.20 (2H, m);  $^{13}\text{C}$  NMR (125.8 MHz,  $\text{CDCl}_3$ )  $\delta$  29.4, 30.1, 49.3, 54.5, 74.1, 123.4, 125.8, 146.9, 153.9, 201.1; HRMS (EI) calcd for  $\text{C}_{14}\text{H}_{19}\text{NO}_4\text{S}$  297.1035, found 297.1030. The ee value was determined by HPLC analysis using a Chiralcel OD column (1 mL/min, 1%,  $i$ -PrOH in hexane); retention times: 18.6 min (major  $R$ -enantiomer) and 29.9 min (minor  $S$ -enantiomer). The absolute stereochemistry was assumed by analogy.

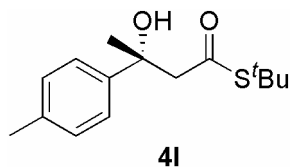

***S*-tert-Butyl (*R*)-3-Hydroxy-3-(4-methylphenyl)butanethioate (4l):**  $[\alpha]_{\text{D}}^{21}$  17.4 ( $c$  1.00,  $\text{CHCl}_3$ ) (92% ee);  $^1\text{H}$  NMR (500 MHz,  $\text{CDCl}_3$ )  $\delta$  1.38 (9H, s), 1.53 (3H, s), 2.33 (3H, s), 2.88 (1H, d,  $J = 15.4$  Hz), 3.04 (1H, d,  $J = 15.4$  Hz), 4.25 (1H, s), 7.13–7.15 (2H, m), 7.32–7.34 (2H, m);  $^{13}\text{C}$  NMR (125.8 MHz,  $\text{CDCl}_3$ )  $\delta$  20.9, 29.5, 30.1, 48.7, 55.3, 73.9, 124.5, 128.8, 136.2, 143.6, 201.3. HRMS (EI) calcd for  $\text{C}_{15}\text{H}_{22}\text{O}_2\text{S}$  266.1341, found 266.1340. The ee value was determined by HPLC analysis using a Chiralcel OD column (1 mL/min, 0.1%,  $i$ -PrOH in hexane); retention times: 17.2 min (major  $R$ -enantiomer) and 20.6 min (minor  $S$ -enantiomer). The absolute stereochemistry was assumed by analogy.

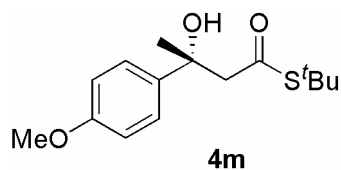

***S*-tert-Butyl (*R*)-3-Hydroxy-3-(4-methoxyphenyl)butanethioate (4m):**  $[\alpha]_{\text{D}}^{18}$  20.2 ( $c$  1.62,  $\text{CHCl}_3$ ) (81% ee);  $^1\text{H}$  NMR (500 MHz,  $\text{CDCl}_3$ )  $\delta$  1.37 (9H, s), 1.52 (3H, s), 2.86 (1H, d,  $J = 15.4$  Hz), 3.03 (1H, d,

$J = 15.3$  Hz), 3.80 (3H, s), 4.25 (1H, s), 6.85–6.88 (2H, m), 7.34–7.37 (2H, m);  $^{13}\text{C}$  NMR (125.8 MHz,  $\text{CDCl}_3$ )  $\delta$  29.5, 30.2, 48.7, 55.2, 55.4, 73.8, 113.4, 125.8, 138.8, 158.3, 201.4; HRMS (EI) calcd for  $\text{C}_{15}\text{H}_{22}\text{O}_3\text{S}$  282.1290, found 282.1286. The ee value was determined by HPLC analysis using a Chiralcel OD column (1 mL/min, 0.5%, *i*-PrOH in hexane); retention times: 15.6 min (major *R*-enantiomer) and 19.1 min (minor *S*-enantiomer). The absolute stereochemistry was assumed by analogy.

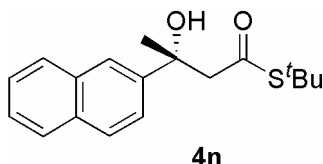

***S*-tert-Butyl (*R*)-3-Hydroxy-3-(2-naphthyl)butanethioate (4n):**  $[\alpha]^{19}_{\text{D}} 23.0$  (*c* 1.00,  $\text{CHCl}_3$ ) (97% ee);  $^1\text{H}$  NMR (500 MHz,  $\text{CDCl}_3$ )  $\delta$  1.32 (9H, s), 1.63 (3H, s), 2.98 (1H, d,  $J = 15.5$  Hz), 3.17 (1H, d,  $J = 15.5$  Hz), 4.45 (1H, s), 7.44–7.49 (2H, m), 7.54 (1H, dd,  $J = 1.8$  and 8.6 Hz), 7.80–7.86 (3H, m), 7.94 (1H, br s);  $^{13}\text{C}$  NMR (125.8 MHz,  $\text{CDCl}_3$ )  $\delta$  29.5, 30.1, 48.9, 55.1, 74.3, 123.2, 123.3, 125.7, 126.0, 127.4, 127.9, 128.2, 132.3, 133.1, 143.9, 201.4; HRMS (EI) calcd for  $\text{C}_{18}\text{H}_{22}\text{O}_2\text{S}$  302.1340, found 302.1349. The ee value was determined by HPLC analysis using a Chiralcel OD column (1 mL/min, 0.1%, *i*-PrOH in hexane); retention times: 7.2 min (major *R*-enantiomer) and 13.9 min (minor *S*-enantiomer). The absolute stereochemistry was assumed by analogy.

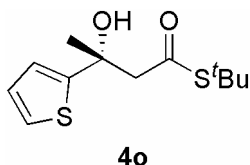

***S*-tert-Butyl (*R*)-3-Hydroxy-(2-thienyl)butanethioate (4o):**  $[\alpha]^{18}_{\text{D}} 11.7$  (*c* 1.32,  $\text{CHCl}_3$ ) (55% ee);  $^1\text{H}$  NMR (500 MHz,  $\text{CDCl}_3$ )  $\delta$  1.40 (9H, s), 1.62 (3H, s), 2.91 (1H, d,  $J = 15.4$  Hz), 3.07 (1H, d,  $J = 15.4$  Hz), 4.61 (1H, br s), 6.89 (1H, dd,  $J = 1.2$  and 3.6 Hz), 6.92 (1H, dd,  $J = 3.6$  and 5.0 Hz), 7.17 (1H, dd,  $J = 1.2$  and 5.0 Hz);  $^{13}\text{C}$  NMR (125.8 MHz,  $\text{CDCl}_3$ )  $\delta$  29.5, 30.8, 48.9, 55.7, 73.2, 122.2, 123.9, 126.6, 151.8, 201.0; HRMS (EI) calcd for  $\text{C}_{12}\text{H}_{18}\text{O}_2\text{S}_2$  258.0748, found 258.0754. The ee value was determined by HPLC analysis using a Chiralpak AD-H column (1 mL/min, 0.5%, *i*-PrOH in hexane); retention times: 11.6 min (major *R*-enantiomer) and 13.1 min (minor *S*-enantiomer). The absolute stereochemistry was assumed by analogy.

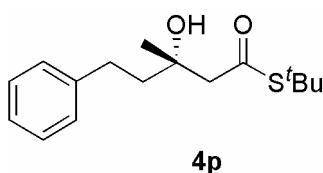



***S*-tert-Butyl (S)-3-Hydroxy-3-methyl-5-phenylpentanethioate (4p)**  $[\alpha]_D^{18} -2.6$  ( $c$  1.48,  $\text{CHCl}_3$ ) (52% ee);  $^1\text{H}$  NMR (500 MHz,  $\text{CDCl}_3$ )  $\delta$  1.31 (3H, s), 1.50 (9H, s), 1.80–1.86 (2H, m), 2.65 (1H, d,  $J = 15.1$  Hz), 2.70–2.74 (3H, m), 3.60 (1H, s), 7.18–7.22 (3H, m), 7.27–7.30 (2H, m);  $^{13}\text{C}$  NMR (125.8 MHz,  $\text{CDCl}_3$ )  $\delta$  26.7, 29.6, 30.3, 43.9, 48.7, 53.7, 72.2, 125.7, 128.26, 128.33, 142.2, 201.4; HRMS (EI) calcd for  $\text{C}_{16}\text{H}_{24}\text{O}_2\text{S}$  280.1497, found 280.1490. The ee value was determined by HPLC analysis using a Chiralcel OD column (1 mL/min, 1%, *i*-PrOH in hexane); retention times: 14.2 min (major *S*-enantiomer) and 16.8 min (minor *R*-enantiomer). The absolute stereochemistry was assumed by analogy.

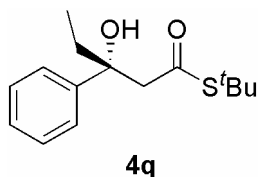

***S*-tert-Butyl (R)-3-Hydroxy-3-phenylpentanethioate (4q):**  $[\alpha]_D^{18} 16.3$  ( $c$  1.61,  $\text{CHCl}_3$ ) (for 66% ee);  $^1\text{H}$  NMR (500 MHz,  $\text{CDCl}_3$ )  $\delta$  0.76 (3H, t,  $J = 7.4$  Hz), 1.32 (9H, s), 1.81 (2H, m), 2.89 (1H, d,  $J = 15.3$  Hz), 3.06 (1H, d,  $J = 15.3$  Hz), 4.24 (1H, s), 7.22 (1H, m), 7.30–7.33 (2H, m), 7.37–7.39 (2H, m);  $^{13}\text{C}$  NMR (125.8 MHz,  $\text{CDCl}_3$ )  $\delta$  7.7, 29.5, 35.5, 48.7, 53.9, 76.7, 125.3, 126.6, 127.9, 144.7, 201.7; HRMS (EI) calcd for  $\text{C}_{15}\text{H}_{22}\text{O}_2\text{S}$  266.1341, found 266.1347. The ee value was determined by HPLC analysis using a Chiralcel OD column (1 mL/min, 0.1%, *i*-PrOH in hexane); retention times: 12.6 min (major *R*-enantiomer) and 14.2 min (minor *S*-enantiomer). The absolute stereochemistry was determined by correlation (*vide infra*).

**Absolute Structure Determination of 4b and 4q.** Treatment of **4b** (91% ee) with NBS in methanol and dichloromethane<sup>6</sup> gave **11a** (90% ee) in 80% yield. The absolute configuration of **4b** was determined to be *R* based on the specific rotation of methyl ester **11a**. The *R* stereochemistry of **4q** was established also by transforming it to methyl ester **11b**.

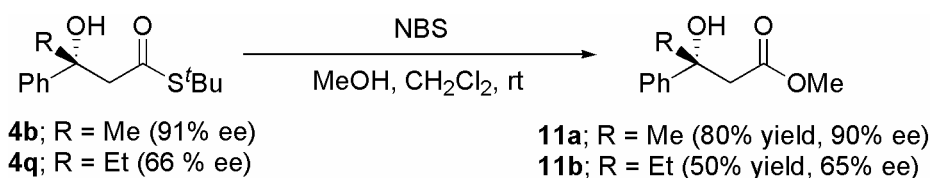

***O*-Methyl (R)-3-Hydroxy-3-phenylbutanoate (11a):** To a solution of **4b** (108 mg, 0.428 mmol, 91% ee) and methanol (0.47 mL, 12 mmol) in  $\text{CH}_2\text{Cl}_2$  (1.3 mL) at room temperature was added *N*-bromosuccinimide (91.3 mg, 0.513 mmol). After being stirred for 1 h at room temperature, the mixture

<sup>6</sup> Minato, H.; Kodama, H.; Miura, T.; Kobayashi, M. *Chem. Lett.* **1977**, 413–416.

was extracted twice with ethyl acetate. The mixture was poured into aqueous NaHCO<sub>3</sub> and extracted three times with ethyl acetate. The organic layers were dried (Na<sub>2</sub>SO<sub>4</sub>) and concentrated in vacuo. Purification of the residue by flash chromatography (20–50% ethyl acetate in hexane) gave 66.3 mg (80% yield) of (*R*)-**8a**:  $[\alpha]^{21}_{\text{D}}$  6.5 (*c* 1.49, EtOH) (90% ee), lit.<sup>7</sup>  $[\alpha]^{24}_{\text{D}}$  –5.6 (*c* 1.09, EtOH) for 83% ee, *S* enantiomer; <sup>1</sup>H NMR (500 MHz, CDCl<sub>3</sub>)  $\delta$  1.55 (3H, s), 2.81 (1H, d, *J* = 16.0 Hz), 2.99 (1H, d, *J* = 16.0 Hz), 3.60 (3H, s), 4.33 (1H, br s), 7.24 (1H, m), 7.32–7.35 (2H, m), 7.44–7.46 (2H, m); <sup>13</sup>C NMR (125.8 MHz, CDCl<sub>3</sub>)  $\delta$  30.5, 46.1, 51.6, 72.6, 124.3, 126.8, 128.2, 146.8, 173.0. The ee value was determined by HPLC analysis using a Chiralcel OD column (1 mL/min, 1%, *i*-PrOH in hexane); retention times: 13.5 min (major *R*-enantiomer) and 15.6 min (minor *S*-enantiomer).

*O*-Methyl (*R*)-3-Hydroxy-3-phenylpentanoate (**11b**): The compound was prepared in 52% yield from **4q** (66% ee) according to a procedure similar to that described above. (*R*)-**8b**:  $[\alpha]^{21}_{\text{D}}$  –0.97 (*c* 1.03, EtOH) (65% ee), lit.<sup>8</sup>  $[\alpha]^{14}_{\text{D}}$  1.64 (*c* 0.85, EtOH) for 77% ee, *S* enantiomer; <sup>1</sup>H NMR (500 MHz, CDCl<sub>3</sub>)  $\delta$  0.76 (3H, t, *J* = 7.4 Hz), 1.77–1.85 (2H, m), 2.81 (1H, d, *J* = 16.0 Hz), 2.98 (1H, d, *J* = 16.0 Hz), 3.57 (3H, s), 4.28 (3H, s), 7.23 (1H, m), 7.31–7.34 (2H, m), 7.38–7.40 (2H, m); <sup>13</sup>C NMR (125.8 MHz, CDCl<sub>3</sub>)  $\delta$  7.8, 35.8, 44.7, 51.7, 75.1, 125.1, 126.7, 128.1, 145.1, 173.4. The ee value was determined by HPLC analysis using a Chiralcel OJ column (1 mL/min, 0.7% *i*-PrOH in hexane); retention times: 13.8 min (major *R*-enantiomer) and 16.5 min (minor *S*-enantiomer).

<sup>7</sup> Denmark, S. E.; Fan, Y.; Eastgate, M. D. *J. Org. Chem.* **2005**, *70*, 5235–5248.

<sup>8</sup> Oisaki, K.; Zhao, D.; Kanai, M.; Shibasaki, M. *J. Am. Chem. Soc.* **2006**, *128*, 7164–7165.

<sup>1</sup>H NMR (500 MHz, CDCl<sub>3</sub>) Spectrum of 4a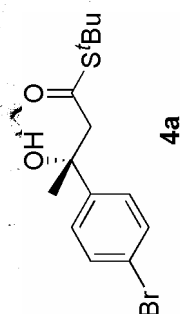

Current Data Parameters  
NAME 140-Bracetophenone-4a.DL  
EXPNO 1  
PROCNO 1

F2 - Acquisition Parameters  
Date\_ 20080116  
Time 14.32  
INSTRUM spect  
PROBHD 5 mm Multispec1  
PULPROG zgpg30  
TD 65536  
SOLVENT CDCl3  
NS 16  
DS 2  
SWH 10330.578 Hz  
FIDRES 0.197632 Hz  
AQ 3.1719923 sec  
RG 181  
DM 48 400 usec  
DE 6.00 usec  
TE 298.0 K  
D1 1.00000000 sec  
MCREST 0.00000000 sec  
MCWRR 0.01500000 sec

===== CHANNEL f1 =====  
NUC1 1H  
P1 10.00 usec  
PL1 -5.00 dB  
SFO1 500.1300885 MHz

F2 - Processing parameters  
SI 32768  
SF 500.1300143 MHz  
WDW EM  
SSB 0  
LB 0.30 Hz  
GB 0  
PC 1.00

1D NMR plot parameters  
CX 20.00 cm  
CY 12.50 cm  
FAP 9.000 ppm  
F1 4501.17 Hz  
FAP 0.000 ppm  
F2 0.00 Hz  
PRGM 0.45000 ppm/cm  
HZCN 295.03848 Hz/cm

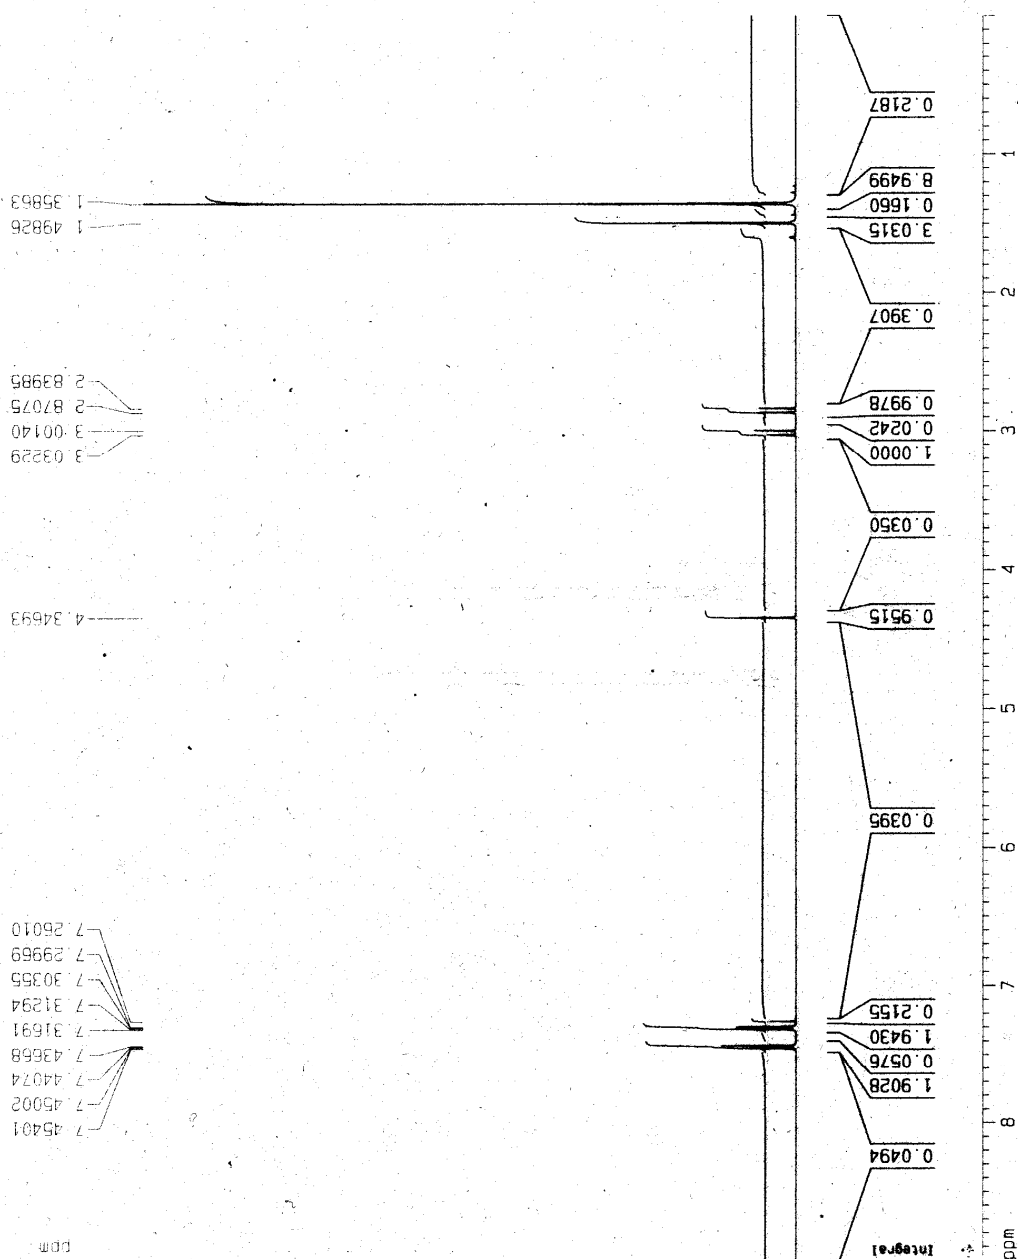

<sup>13</sup>C NMR (125.8 MHz, CDCl<sub>3</sub>) Spectrum of 4a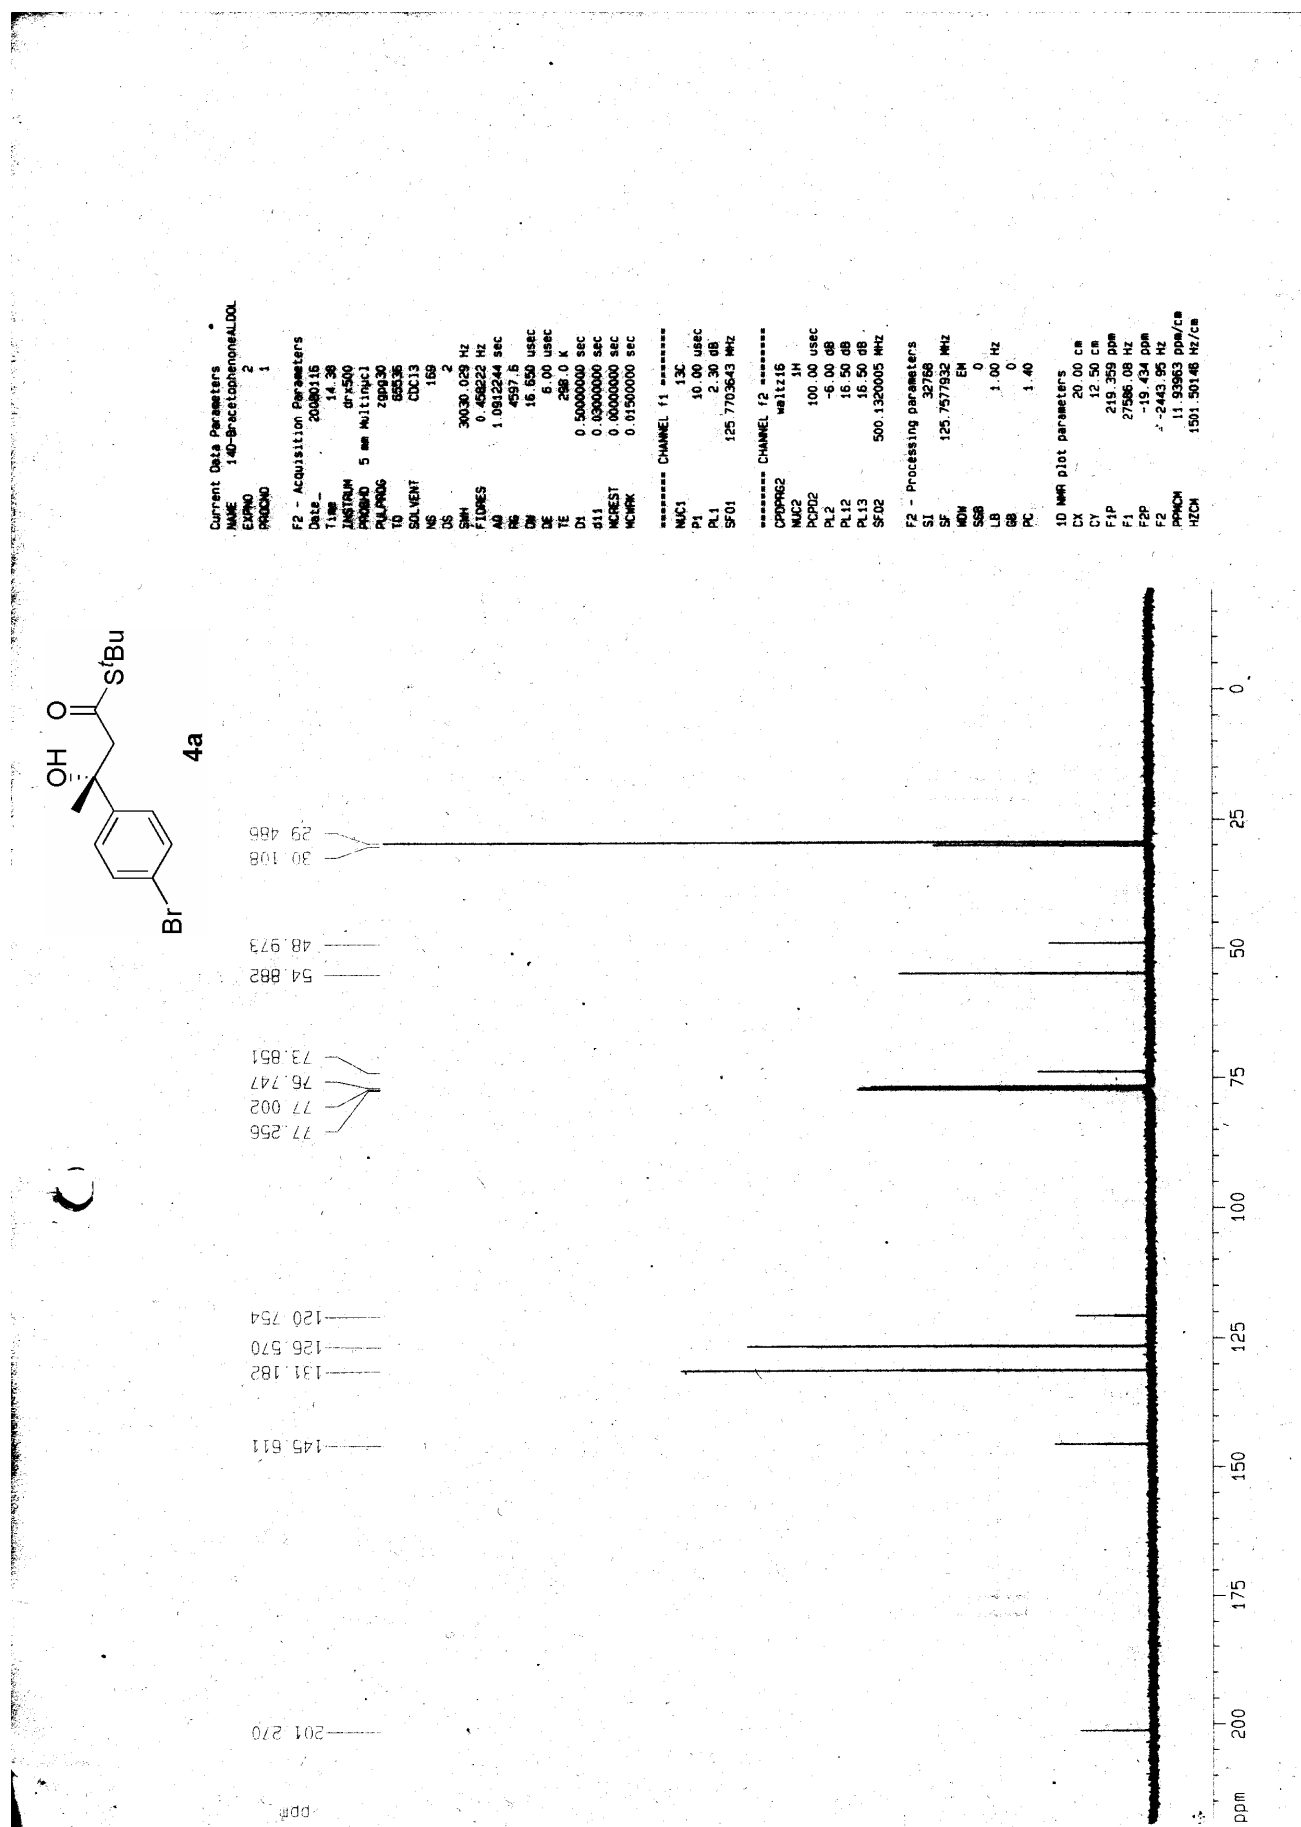

<sup>1</sup>H NMR (500 MHz, CDCl<sub>3</sub>) Spectrum of 5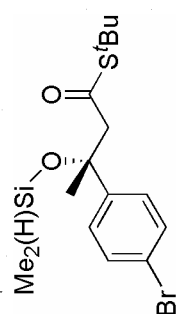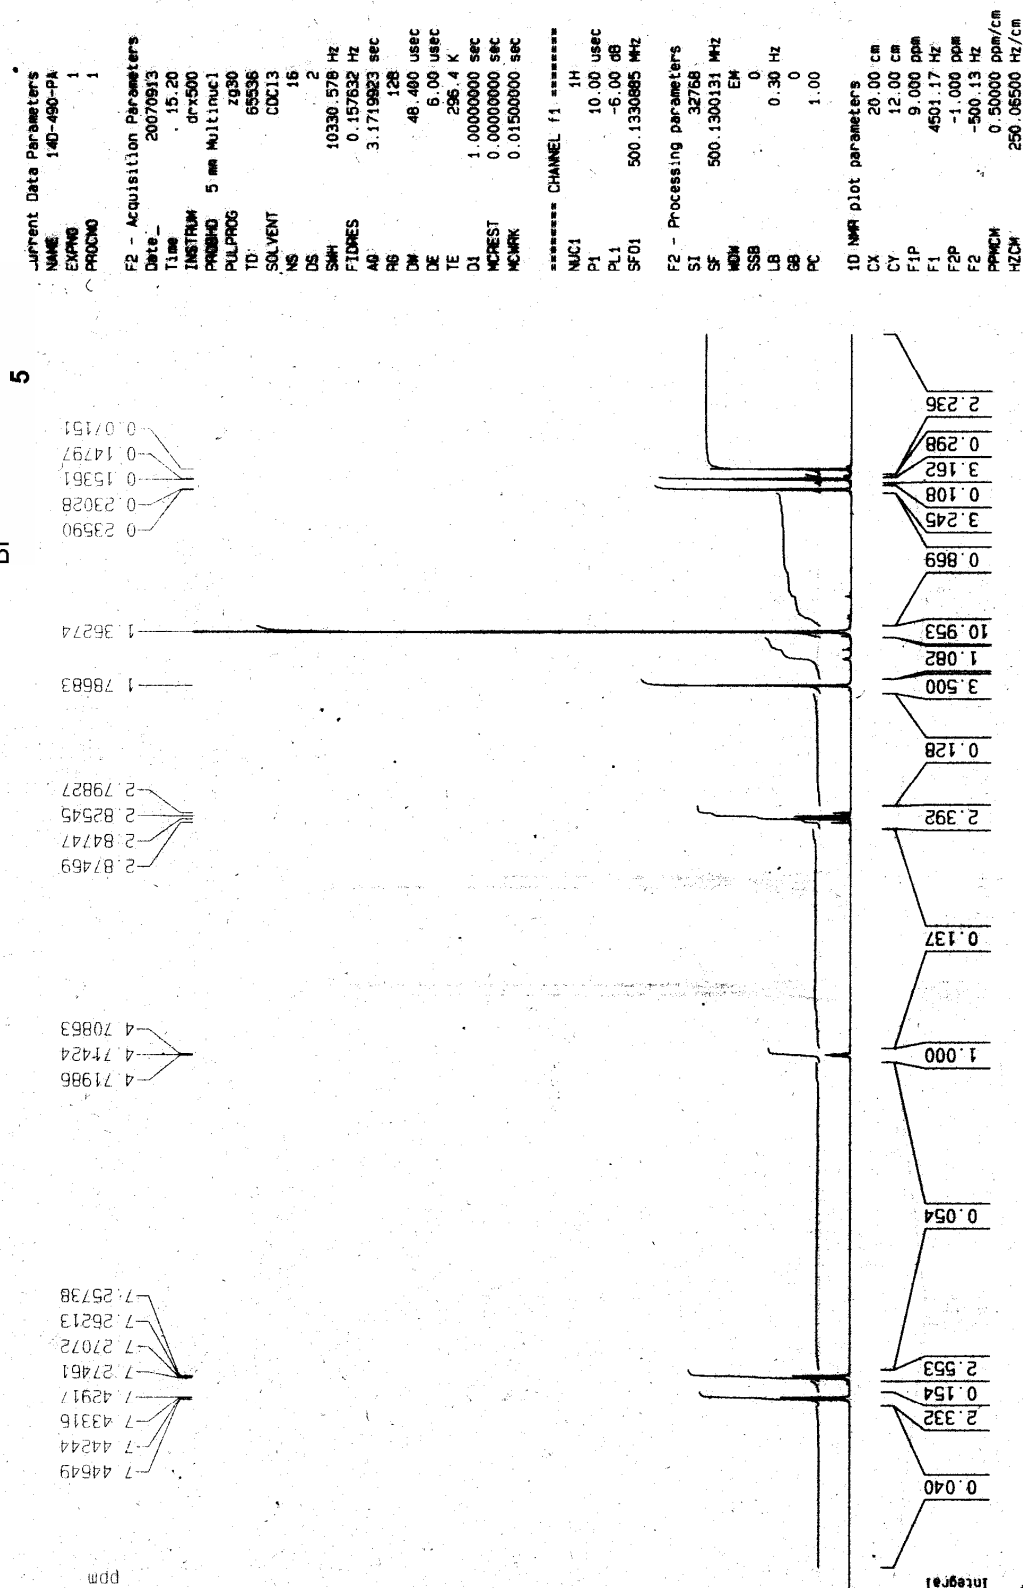

<sup>13</sup>C NMR (125.8 MHz, CDCl<sub>3</sub>) Spectrum of 5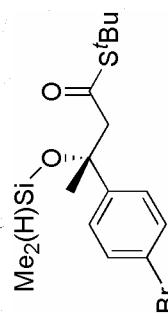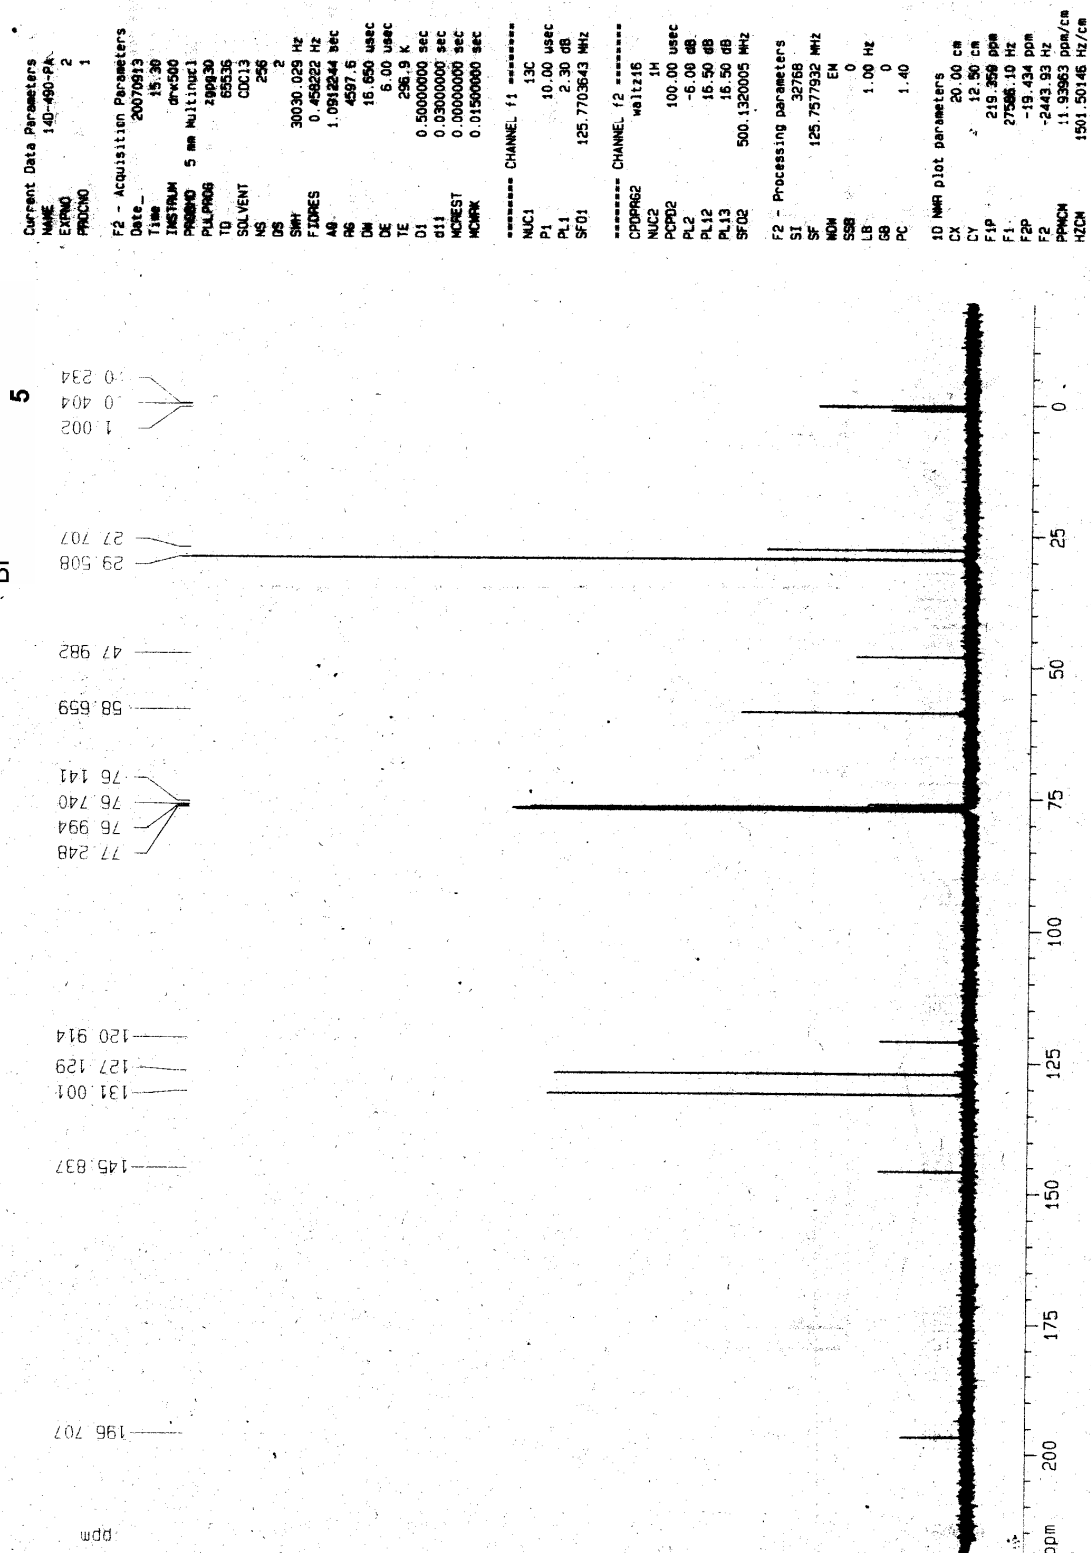

<sup>1</sup>H NMR (500 MHz, CDCl<sub>3</sub>) Spectrum of 6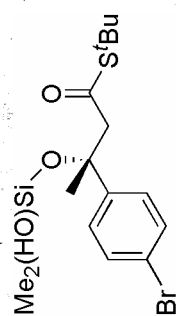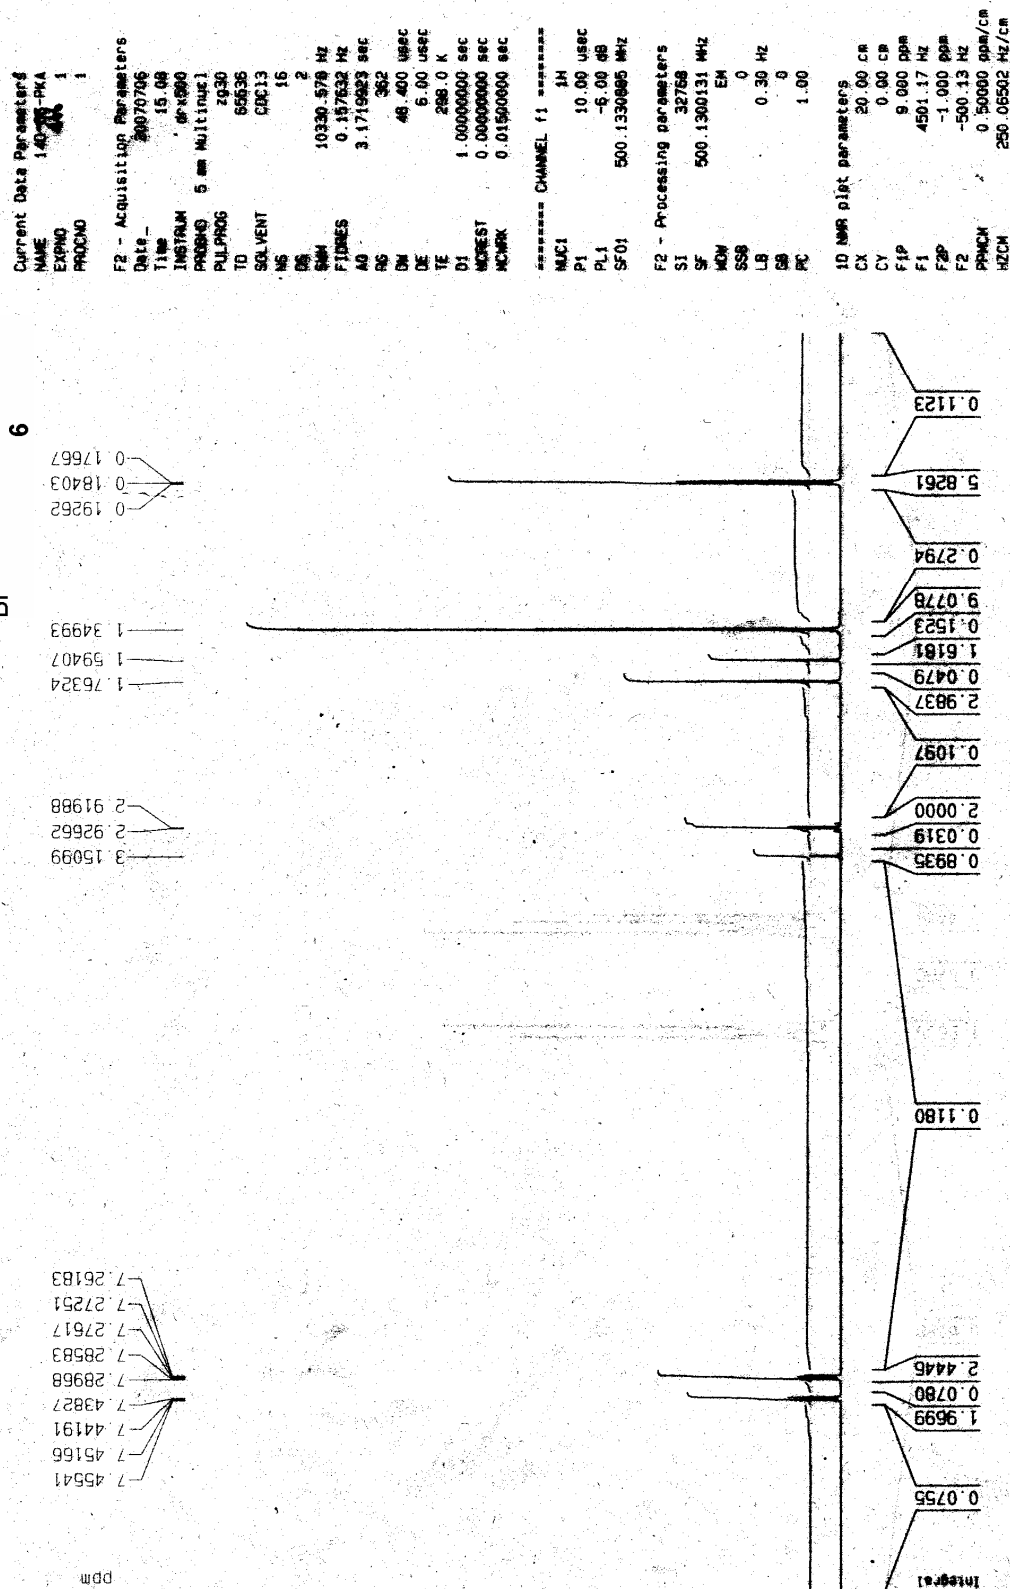

<sup>13</sup>C NMR (125.8 MHz, CDCl<sub>3</sub>) Spectrum of 6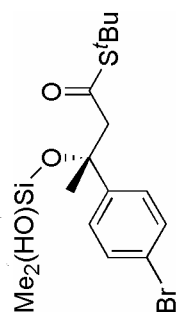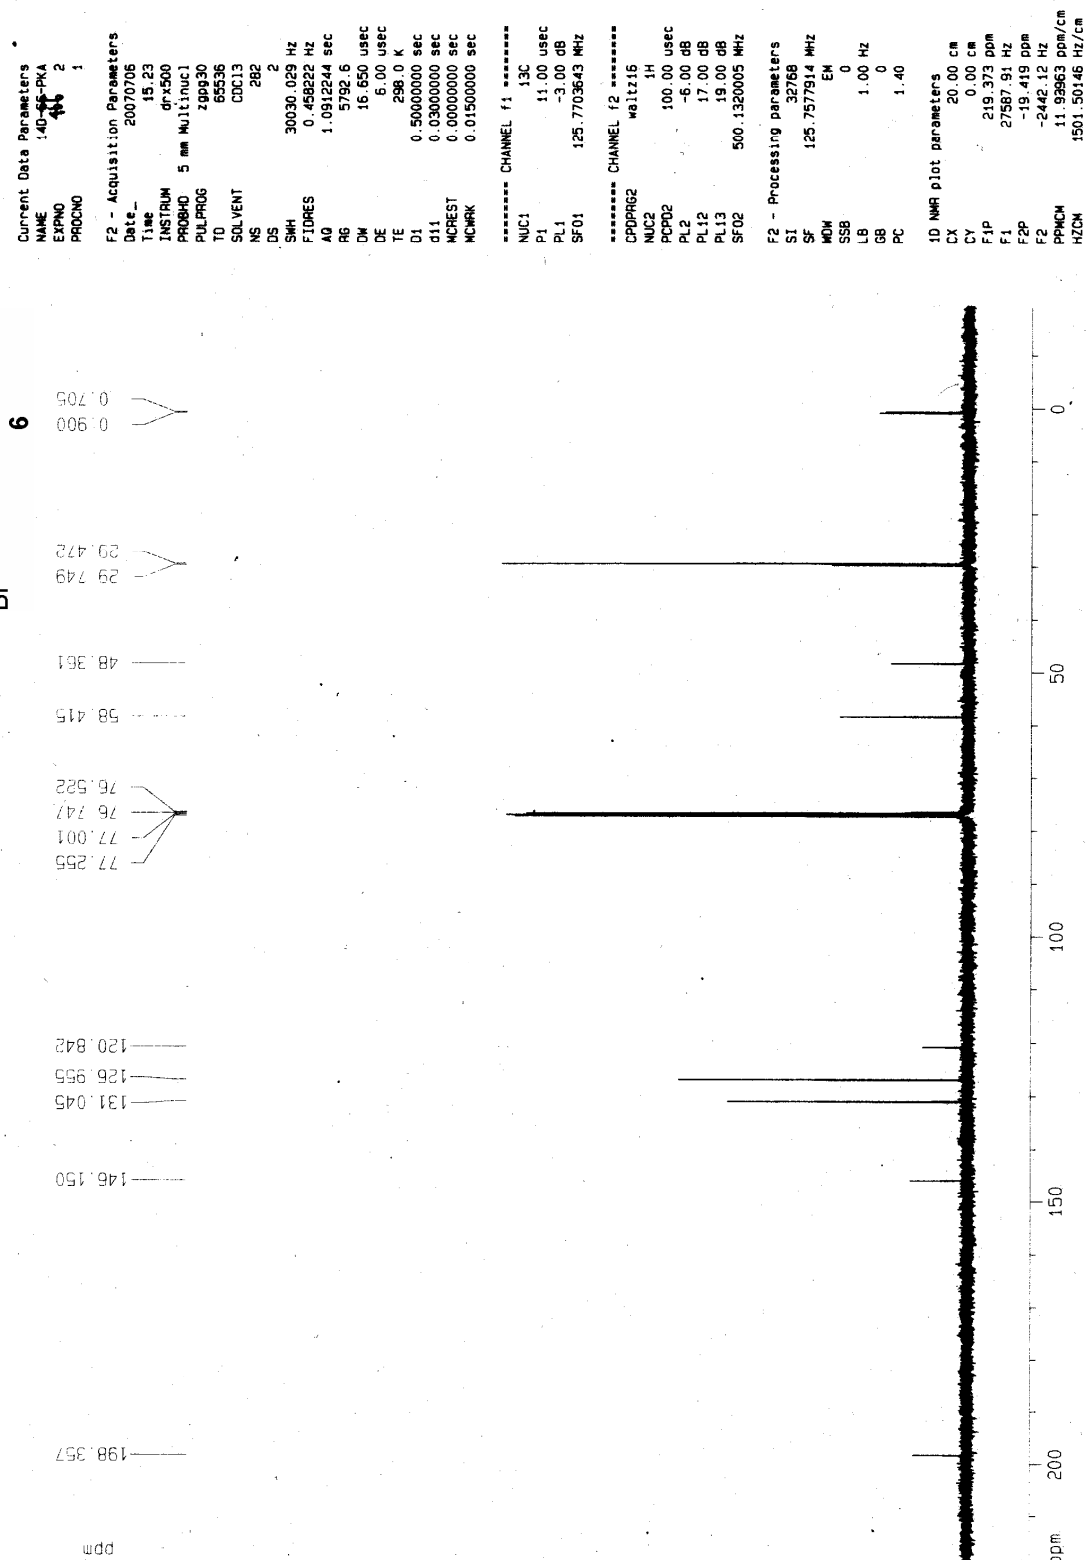



<sup>1</sup>H NMR (500 MHz, CDCl<sub>3</sub>) Spectrum of 7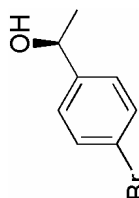

7

## Current Data Parameters

NAME 140-00-PK  
EXPNO 1  
PROCNO 1

## F2 - Acquisition Parameters

Date\_ 20070706  
Time 15.45  
INSTRUM drx500  
PROBHD 5 mm Multinucl  
PULPROG zg30  
TD 65536  
SOLVENT CDCl<sub>3</sub>  
NS 16  
DS 2  
SS 10330.578 Hz  
FIDRES 0.157632 Hz  
AQ 3.1719923 sec  
RG 256  
DW 48.400 usec  
DE 6.00 usec  
TE 298.0 K  
D1 1.00000000 sec  
MCREST 0.00000000 sec  
MCWRK 0.01500000 sec

## ===== CHANNEL f1 =====

NUC1 <sup>1</sup>H  
P1 10.00 usec  
PL1 -6.00 dB  
SF01 500.1330885 MHz

## F2 - Processing parameters

SF 32768  
SF 500.1300140 MHz  
WDW EM  
SSB 0  
LB 0.30 Hz  
GB 0  
PC 1.00

## 10 NMR plot parameters

CX 20.00 cm  
CY 12.50 cm  
FIP 9.000 ppm  
F1 4501.17 Hz  
F2 0.000 ppm  
F2 0.00 Hz  
PPMCH 0.45000 ppm/cm  
HZCM 225.05849 Hz/cm

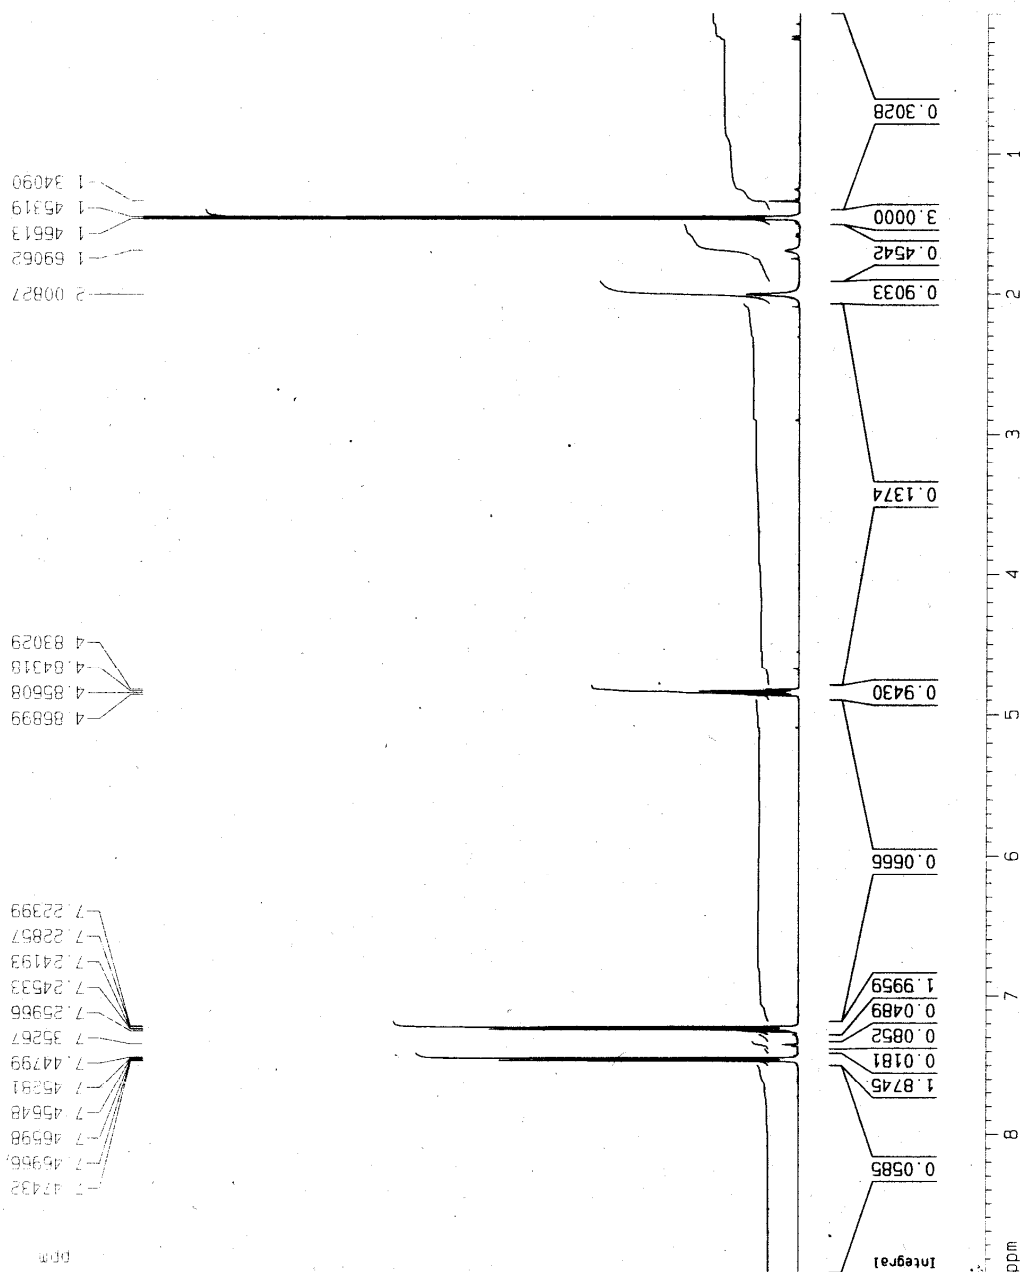

<sup>1</sup>H NMR (500 MHz, CDCl<sub>3</sub>) Spectrum of 4b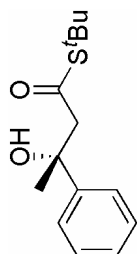

**4b**

Current Data Parameters  
 NAME 14D-acetophenoneDOL  
 EXPNO 1  
 PROCNO 1

F2 - Acquisition Parameters  
 Date\_ 20080116  
 Time 19.55  
 INSTRUM drx500  
 PROBO 5 mm Multinucl  
 PULPROG zg30  
 TD 65536  
 SOLVENT CDCl<sub>3</sub>  
 NS 16  
 DS 2  
 SWH 10330.578 Hz  
 FIDRES 0.157632 Hz  
 AQ 3.1719923 sec  
 RG 71.8  
 DM 48.400 usec  
 DE 6.00 usec  
 TE 298.0 K  
 D1 1.00000000 sec  
 MCREST 0.00000000 sec  
 MCNPK 0.01500000 sec

\*\*\*\*\* CHANNEL f1 \*\*\*\*\*  
 NUC1 1H  
 P1 10.00 usec  
 PL1 -6.00 dB  
 SF01 500.1330885 MHz

F2 - Processing parameters  
 SI 32768  
 SF 500.1330146 MHz  
 WDW EM  
 SSB 0  
 LB 0.30 Hz  
 GB 0  
 PC 1.00

1D NMR plot parameters  
 CX 20.00 cm  
 CY 12.50 cm  
 F1P 9.000 ppm  
 F1 4501.17 Hz  
 F2P 0.000 ppm  
 F2 0.00 Hz  
 PPKWH 0.45000 ppm/cm  
 HZCM 225.05849 Hz/cm

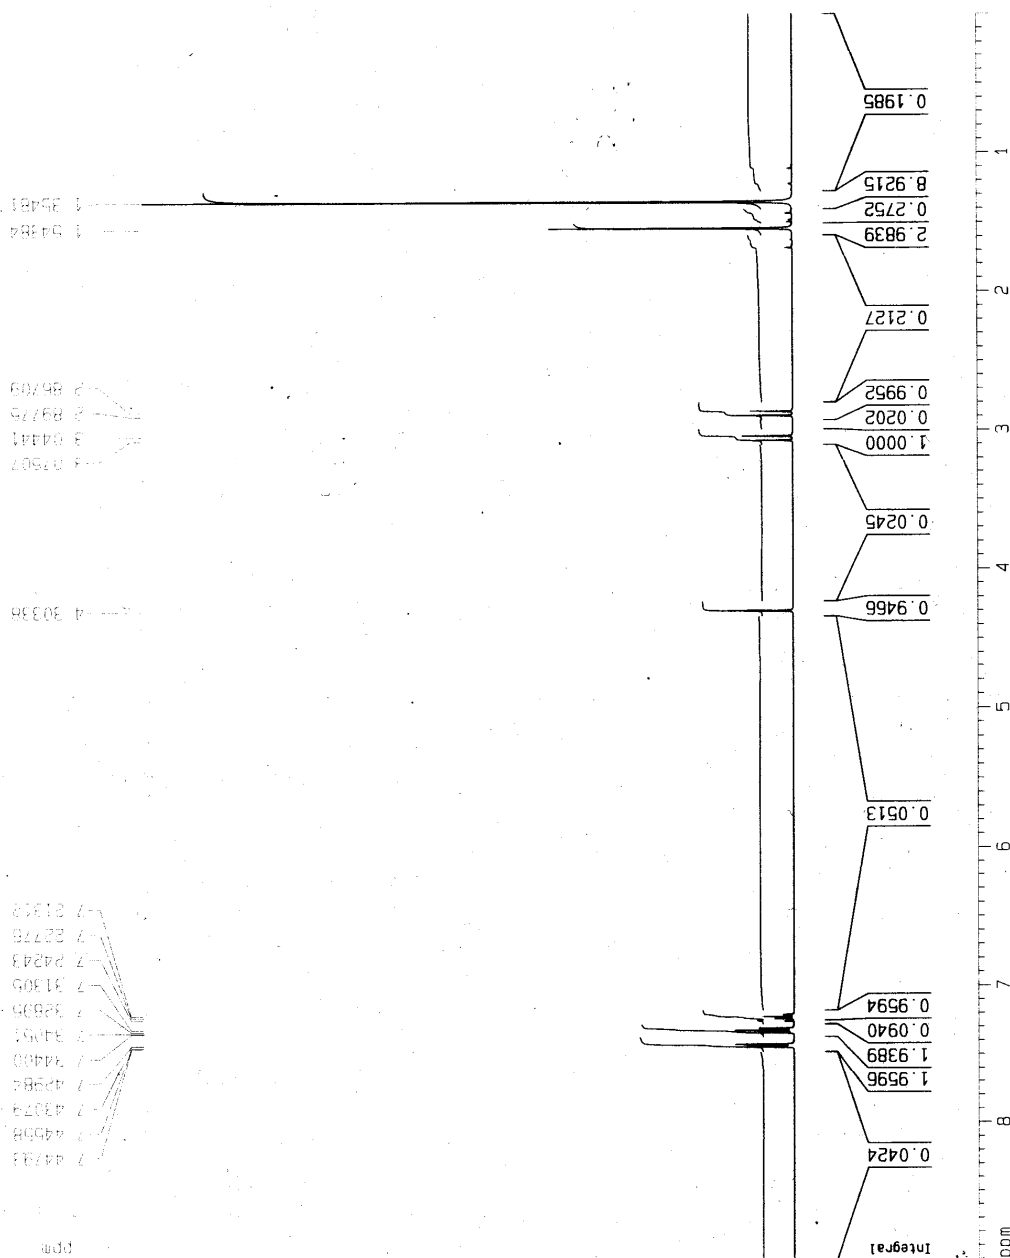

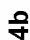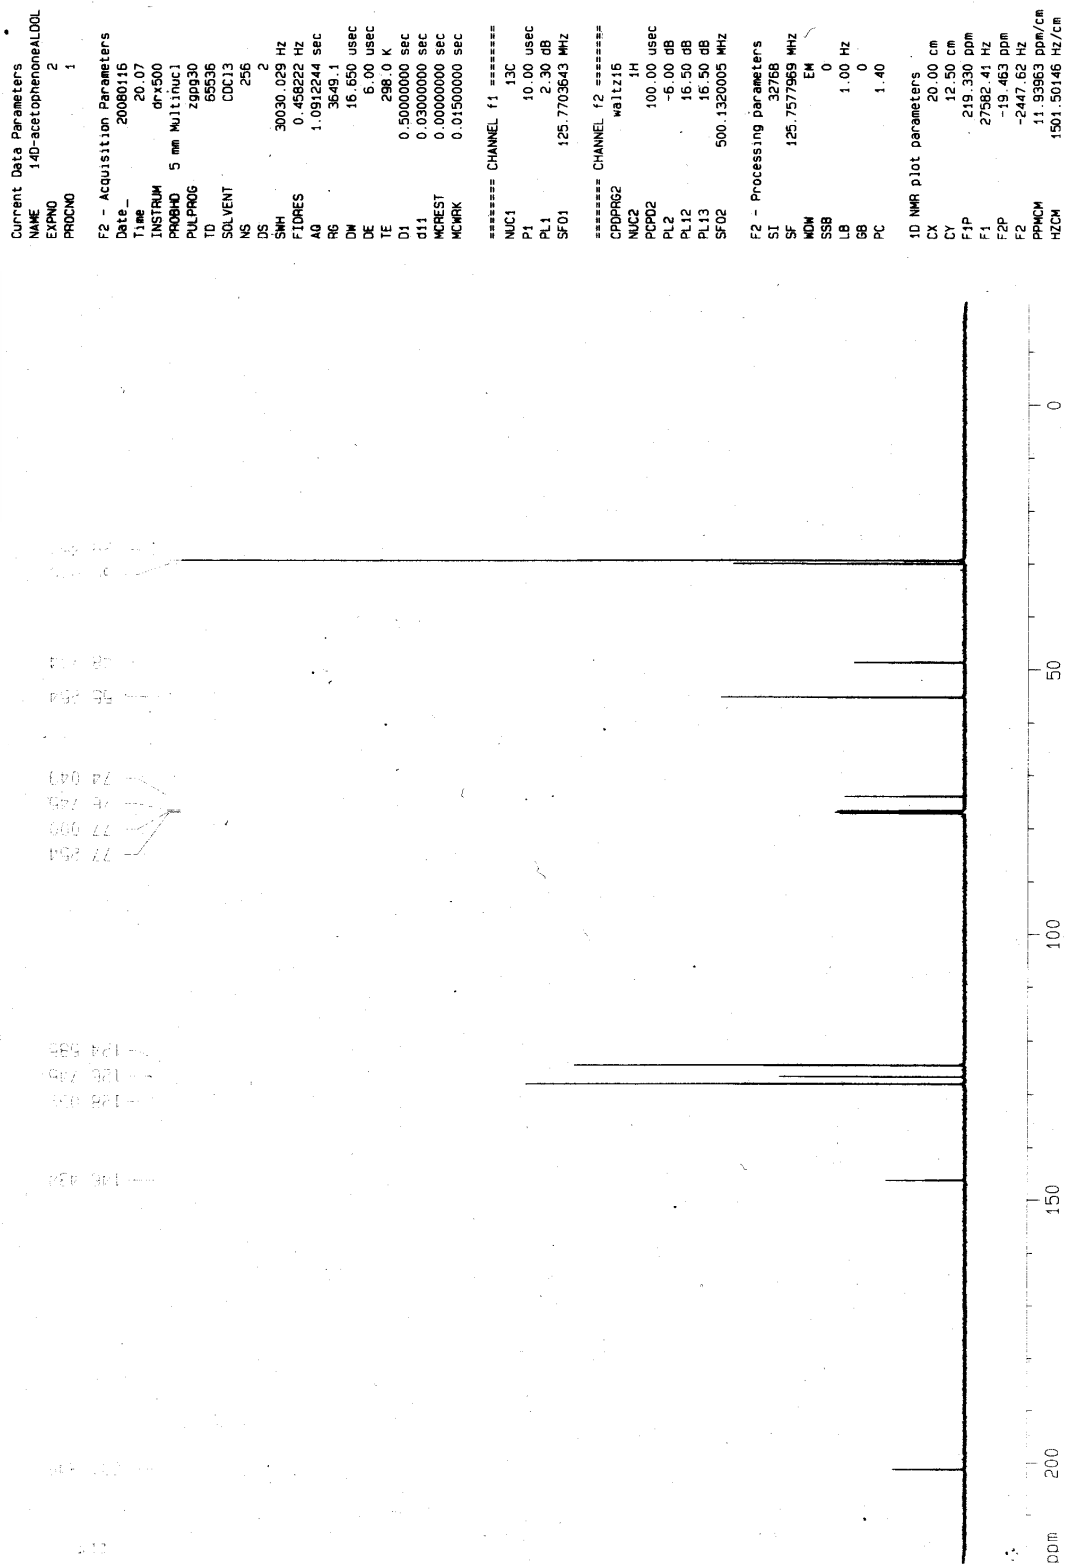

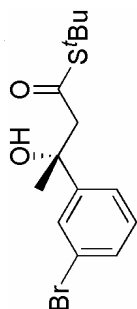

4c

```

Current Data Parameters
=====
NAME      140-140
EXPNO      1
PROCNO     1

F2 - Acquisition Parameters
=====
Date_      20080229
Time       19:01
INSTRUM    drX500
PROBHD     5 mm Multinucl
PULPROG    zg30
TD         65536
SOLVENT    CDC13
NS         32
DS         2
SWH         10330.578 Hz
FIDRES     0.157632 Hz
AQ         3.1719923 sec
RG         71.8
WDW         48.400 usec
DE         6.00 usec
TE         300.0 K
D1         1.00000000 sec
MCRCST     0.00000000 sec
MCWRK      0.01500000 sec

===== CHANNEL f1 =====
NUC1       1H
P1         10.00 usec
PL1        -6.00 dB
SFO1       500.1330885 MHz

F2 - Processing parameters
=====
SI         32768
SF         500.1300137 MHz
WDW        EM
SSB        0
LB         0.30 Hz
GB         0
PC         1.00

1D NMR plot parameters
=====
CX         20.00 cm
CY         12.50 cm
F1P        9.000 ppm
F1         4501.17 Hz
F2P        0.000 ppm
F2         0.00 Hz
PPMCHM     0.45000 ppm/cm
HZCM       225.05849 Hz/cm

```

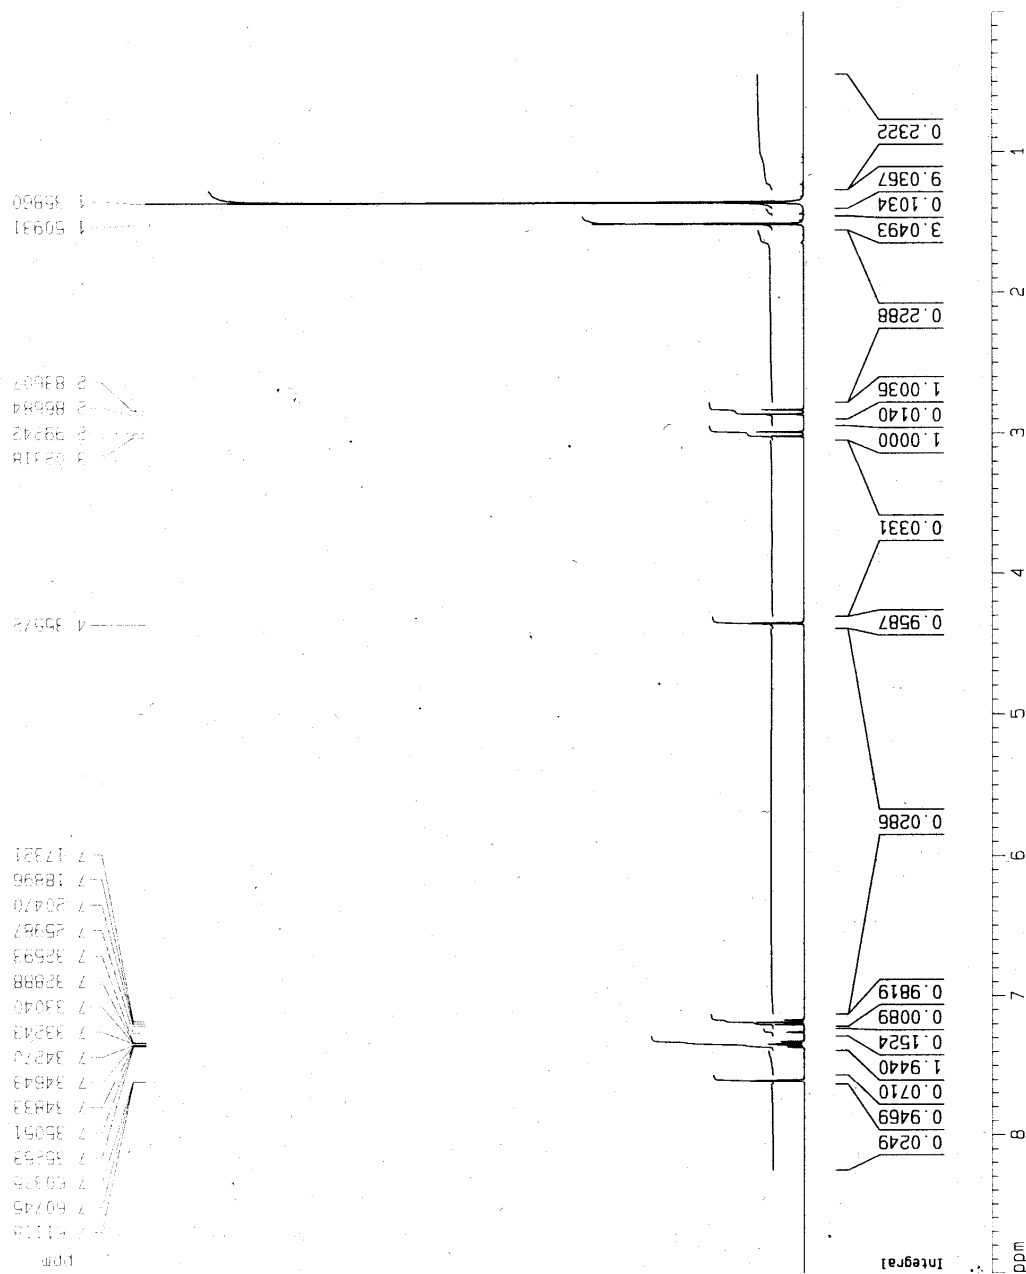

<sup>13</sup>C NMR (125.8 MHz, CDCl<sub>3</sub>) Spectrum of 4c

Current Data Parameters  
NAME 140-P8-  
EXPNO 2  
PROCNO 1

F2 - Acquisition Parameters  
Date\_ 20080229  
Time 19.06  
INSTRUM drx500  
PROBHD 5 mm Multinuc1  
PULPROG zgpg30  
TD 65536  
SOLVENT CDCl3  
NS 138  
DS 2  
SWH 30030.029 Hz  
FIDRES 0.458222 Hz  
AQ 1.0912244 sec  
RG 3649.1  
DM 16.650 usec  
DE 6.00 usec  
TE 298.0 K  
D1 0.50000000 sec  
d11 0.03000000 sec  
ACQRES 0.00000000 sec  
MCWK 0.01500000 sec

===== CHANNEL f1 =====  
NUC1 13C  
P1 10.00 usec  
PL1 2.30 dB  
SF01 125.7703643 MHz

===== CHANNEL f2 =====  
CPDPRG2 waltz16  
NUC2 1H  
PCPD2 100.00 usec  
PL2 -6.00 dB  
PL12 16.50 dB  
PL13 16.50 dB  
SF02 500.1320005 MHz

F2 - Processing parameters  
SI 32768  
SF 125.7577951 MHz  
WDW EM  
SSB 0  
LB 1.00 Hz  
GB 0  
PC 1.40

1D NMR plot parameters  
CX 20.00 cm  
CY 12.50 cm  
FIP 219.344 ppm  
F1 27584.25 Hz  
F2 -19.448 ppm  
F2 -2445.78 Hz  
PPMCM 11.93863 ppm/cm  
HZCM 1501.50146 Hz/cm

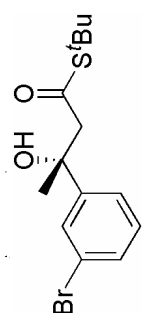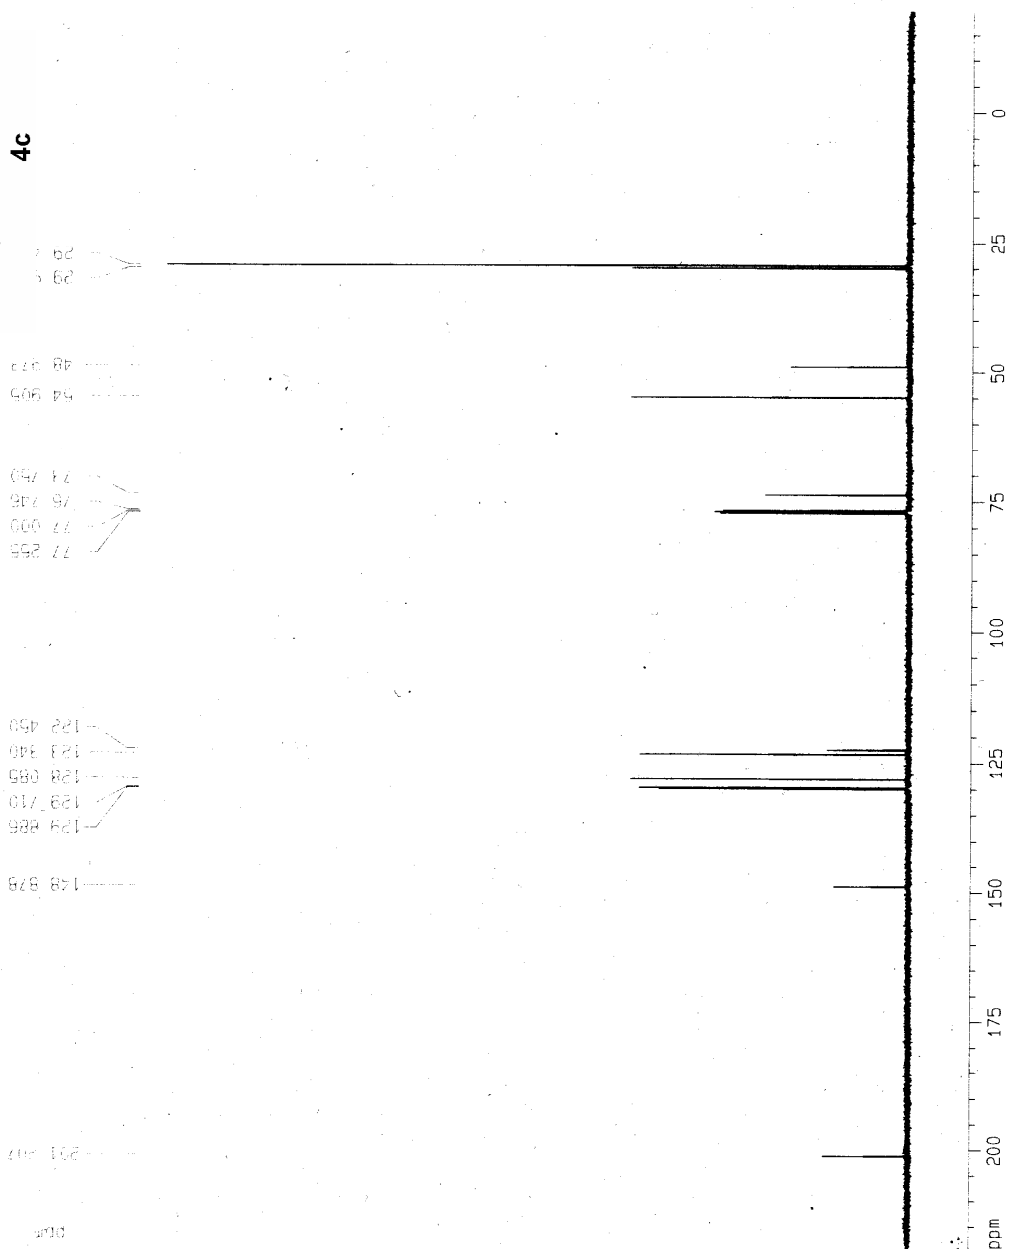

<sup>1</sup>H NMR (500 MHz, CDCl<sub>3</sub>) Spectrum of 4d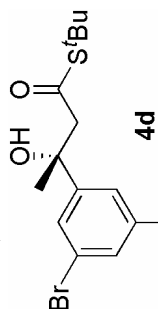

Current Data Parameters  
NAME 14D-562  
EXPNO 1  
PROCNO 1

F2 - Acquisition Parameters  
Date\_ 20080206  
Time 19.22  
INSTRUM drx500  
PROBHD 5 mm Multinucl  
PULPROG zg30  
TD 65536  
SOLVENT CDCl<sub>3</sub>  
NS 16  
DS 2  
SWH 10330.578 Hz  
FIDRES 0.157632 Hz  
AQ 3.171923 sec  
RG 456.1  
DM 48.400 usec  
DE 6.00 usec  
TE 298.0 K  
D1 1.00000000 sec  
MCREST 0.00000000 sec  
MCWRR 0.01500000 sec

===== CHANNEL f1 =====  
NUC1 <sup>1</sup>H  
P1 10.00 usec  
PL1 -6.00 dB  
SF01 500.1330885 MHz

F2 - Processing parameters  
SI 32768  
SF 500.1300131 MHz  
WDW EM  
SSB 0  
LB 0.30 Hz  
GB 0  
PC 1.00

1D NMR plot parameters  
CX 20.00 cm  
CY 12.50 cm  
F1P 9.000 ppm  
F1 4501.17 Hz  
F2P 0.000 ppm  
F2 0.00 Hz  
PPMCM 0.45000 ppm/cm  
HZCM 225.05849 Hz/cm

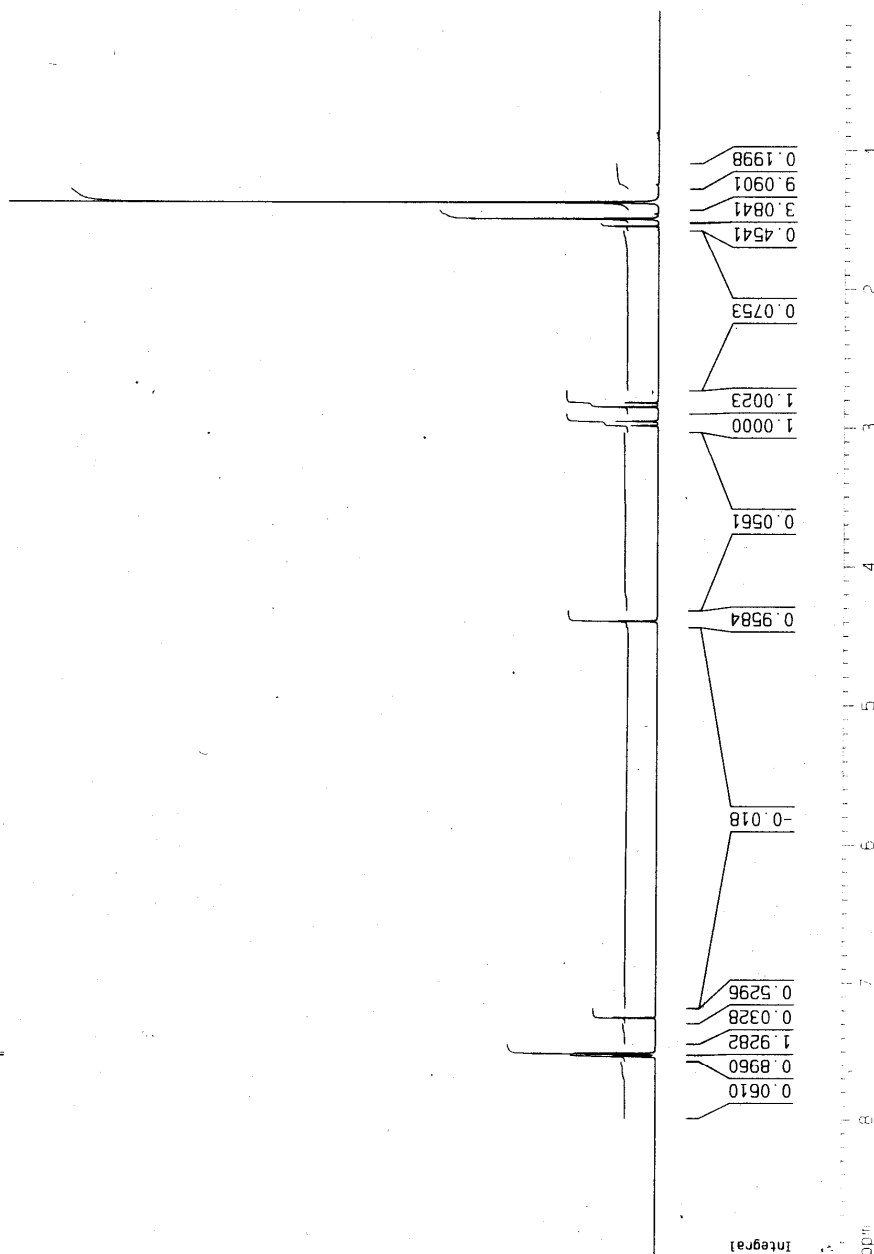

<sup>13</sup>C NMR (125.8 MHz, CDCl<sub>3</sub>) Spectrum of 4d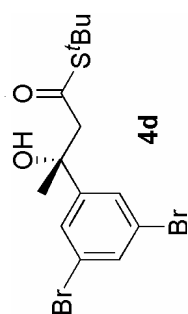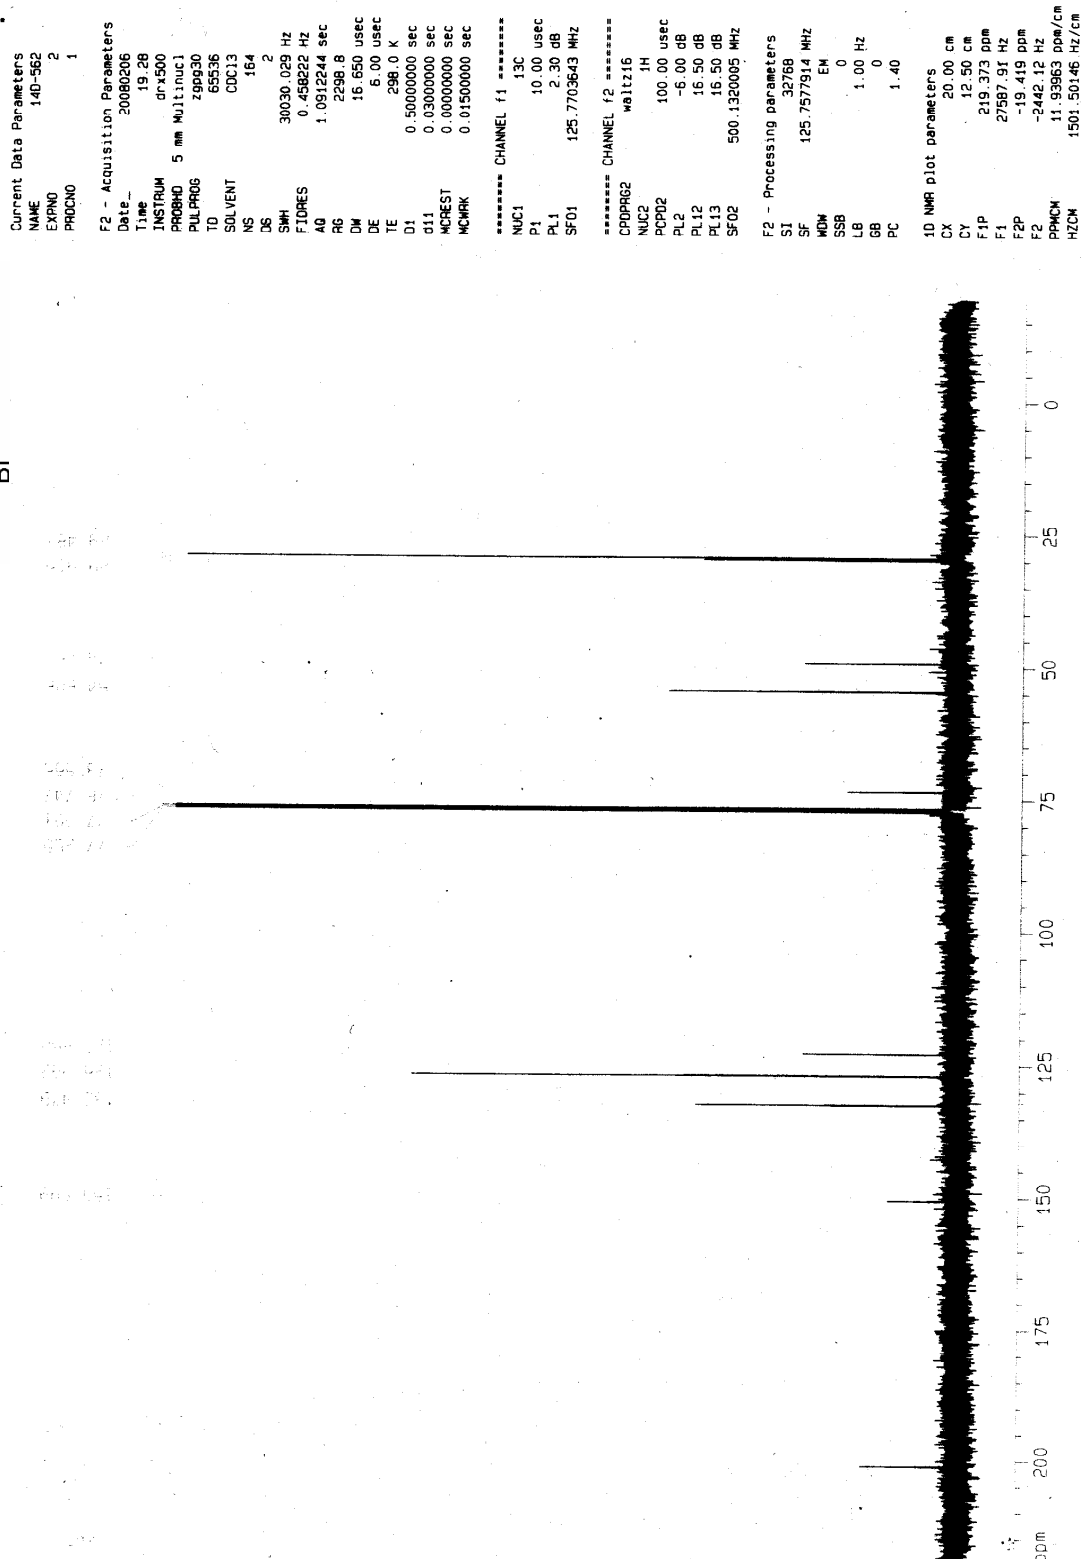

<sup>1</sup>H NMR (500 MHz, CDCl<sub>3</sub>) Spectrum of 4e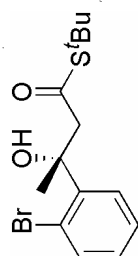

Current Data Parameters  
NAME 14D-555-PA  
EXPNO 1  
PROCNO 1

F2 - Acquisition Parameters  
Date\_ 20080129  
Time 12.56  
INSTRUM drx500  
PROBHD 5 mm Multinucl  
PULPROG zg30  
TD 65536  
SOLVENT CDCl<sub>3</sub>  
NS 16  
DS 2  
SMH 10330.578 Hz  
FIDRES 0.157632 Hz  
AQ 3.1719923 sec  
RG 114  
DM 48.400 usec  
DE 6.00 usec  
TE 298.0 K  
D1 1.00000000 sec  
MCREST 0.00000000 sec  
MCWPK 0.01500000 sec

===== CHANNEL f1 =====  
NUC1 1H  
P1 10.00 usec  
PL1 -6.00 dB  
SF01 500.1330885 MHz

F2 - Processing parameters  
SI 32768  
SF 500.1300127 MHz  
WDW EM  
SSB 0  
LB 0.30 Hz  
GB 0  
PC 1.00

1D NMR plot parameters  
CX 20.00 cm  
CY 12.50 cm  
F1P 9.000 ppm  
F1 4501.17 Hz  
F2P 0.000 ppm  
F2 0.00 Hz  
PPMCM 0.45000 ppm/cm  
HZCM 225.05849 Hz/cm

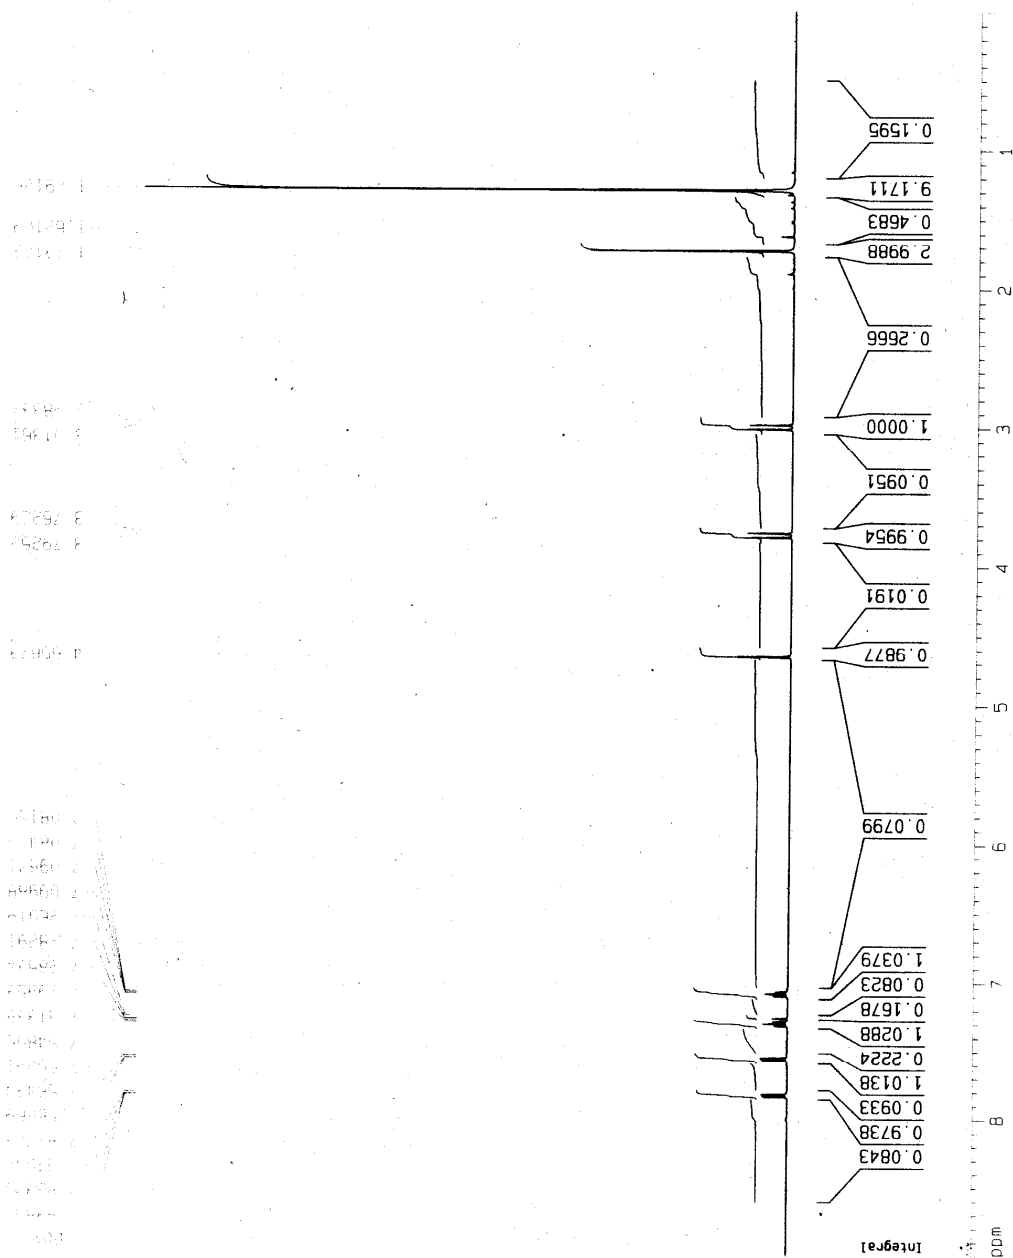



<sup>13</sup>C NMR (125.8 MHz, CDCl<sub>3</sub>) Spectrum of 4e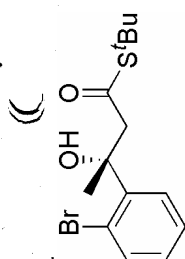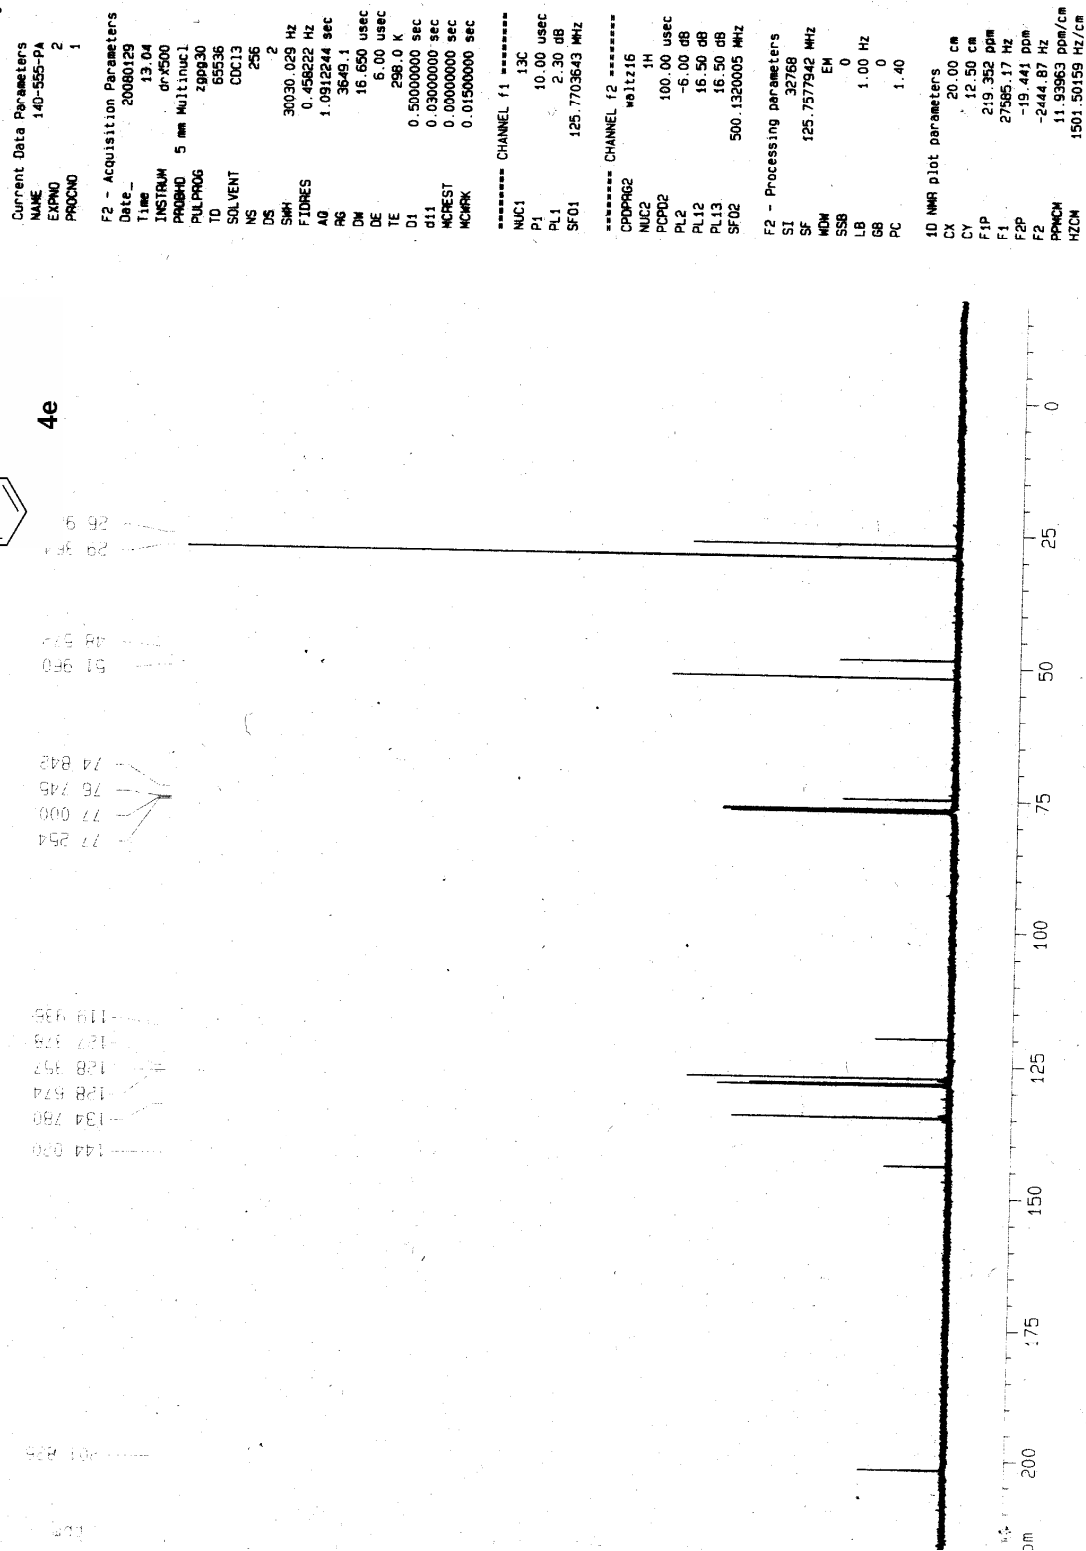

<sup>1</sup>H NMR (500 MHz, CDCl<sub>3</sub>) Spectrum of 4f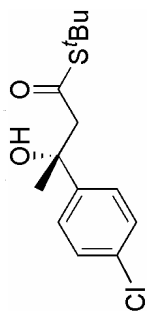

Current Data Parameters  
NAME 140-PC1  
EXPNO 1  
PROCNO 1

F2 - Acquisition Parameters  
Date\_ 20080229  
Time 18.50  
INSTRUM drx500  
PROBHD 5 mm Multinucl  
PULPROG zg30  
TD 65536  
SOLVENT CDCl<sub>3</sub>  
NS 32  
DS 2  
SWH 10330.578 Hz  
FIDRES 0.157632 Hz  
AQ 3.1719923 sec  
RG 71.8  
DN 48.400 usec  
DE 6.00 usec  
TE 298.0 K  
D1 1.00000000 sec  
MCREST 0.00000000 sec  
MCWPK 0.01500000 sec

===== CHANNEL f1 =====  
NUC1 1H  
P1 10.00 usec  
PL1 -6.00 dB  
SF01 500.130885 MHz

F2 - Processing parameters  
SI 32768  
SF 500.1300137 MHz  
WDW EM  
SSB 0  
LB 0.30 Hz  
GB 0  
PC 1.00

1D NMR plot parameters  
CX 20.00 cm  
CY 12.50 cm  
FIP 9.000 ppm  
F1 4501.17 Hz  
F2 0.000 ppm  
F2 0.00 Hz  
PPMCH 0.45000 ppm/cm  
HZCM 225.05849 Hz/cm

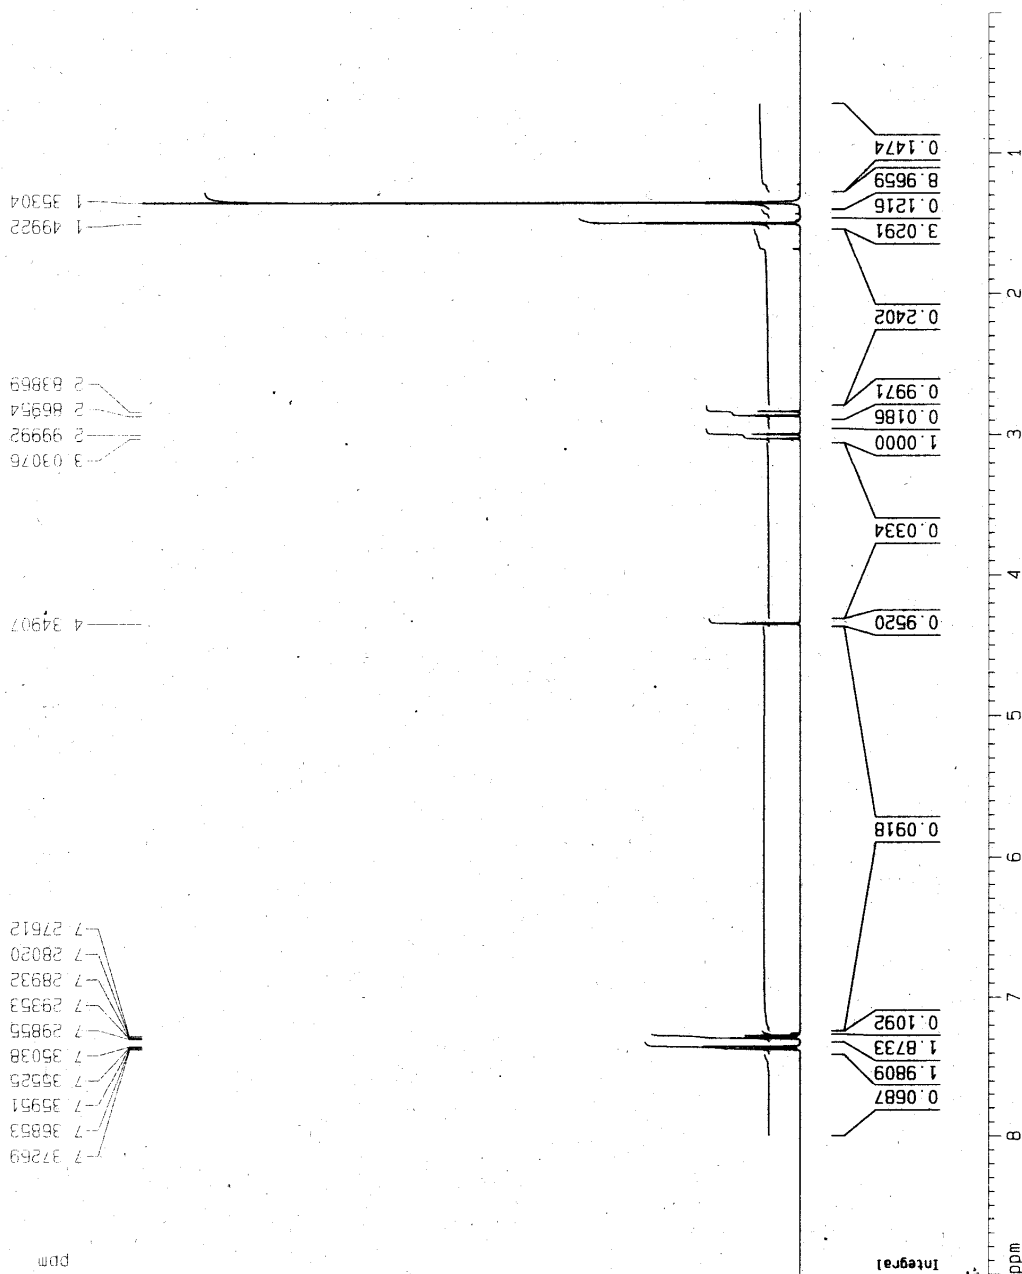

<sup>13</sup>C NMR (125.8 MHz, CDCl<sub>3</sub>) Spectrum of 4f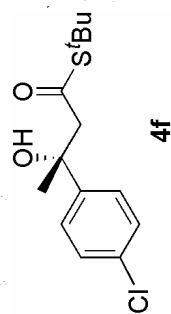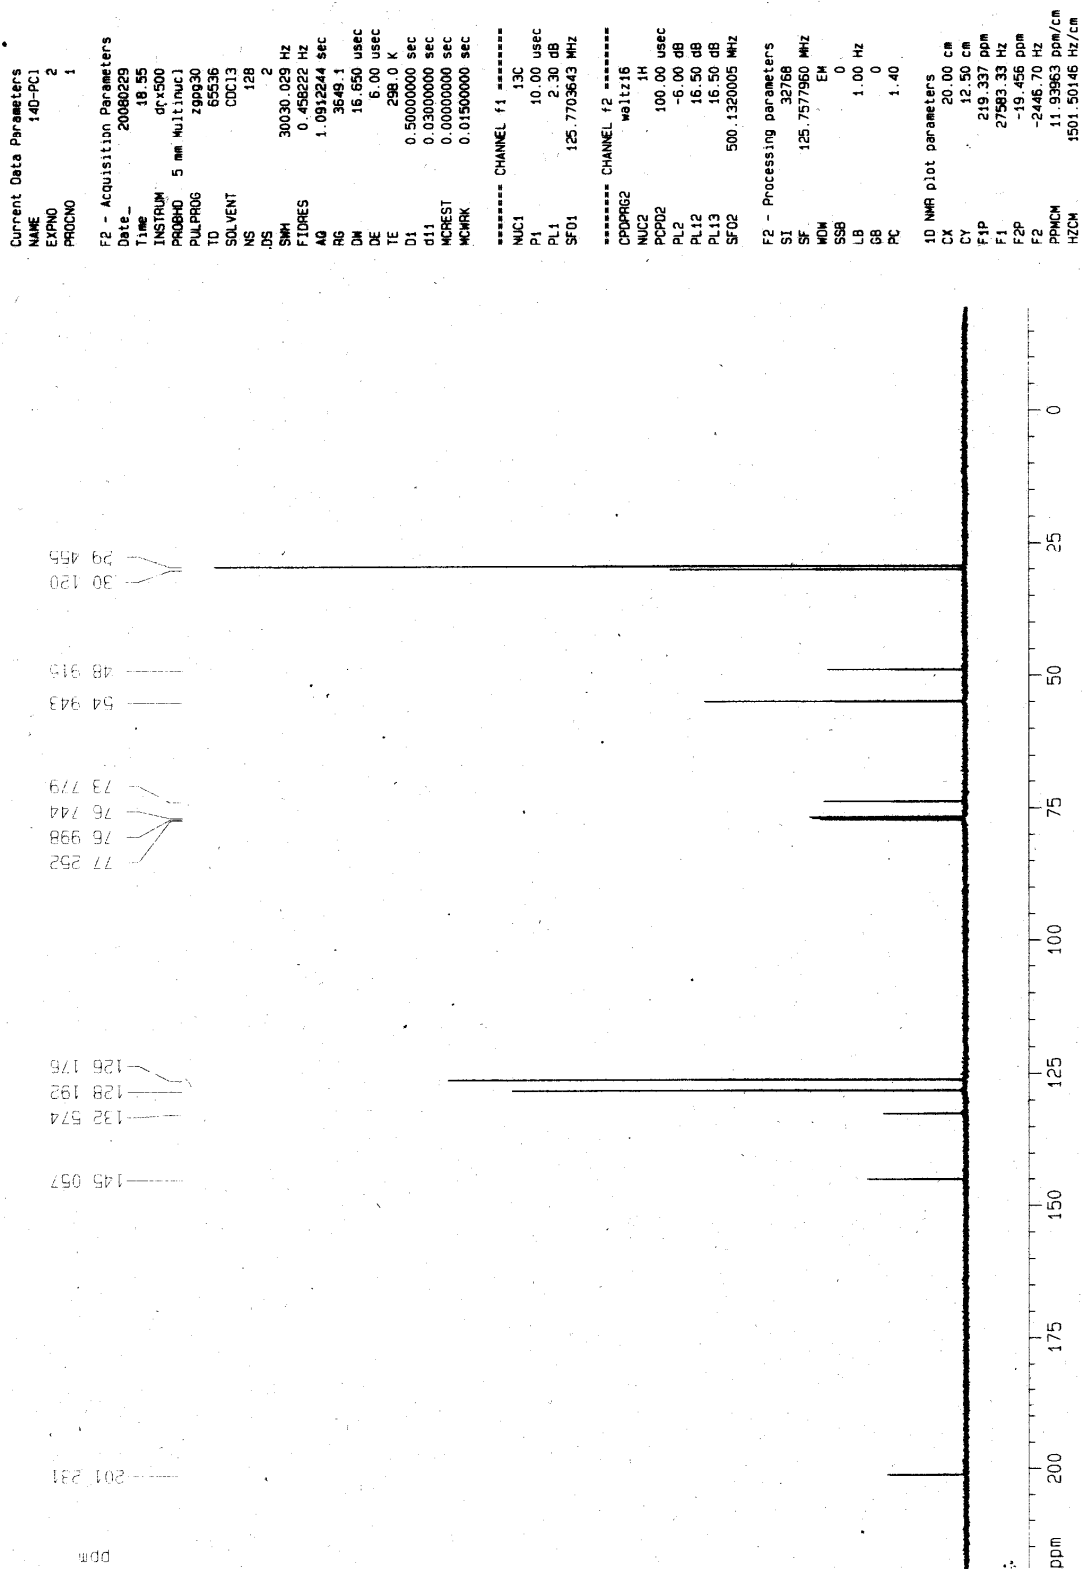

<sup>1</sup>H NMR (500 MHz, CDCl<sub>3</sub>) Spectrum of 4g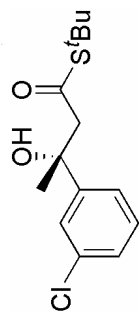

4g

Current Data Parameters  
NAME 140-466-BUNSHU  
EXPNO 1  
PROCNO 1

F2 - Acquisition Parameters  
Date\_ 20080228  
Time 19.01  
INSTRUM drx500  
PROBHD 5 mm Multinuc1  
PULPROG zg30  
TD 65536  
SOLVENT CDCl3  
NS 32  
DS 2  
SWH 10330.578 Hz  
FIDRES 0.157632 Hz  
AQ 3.1719923 sec  
RG 64  
DM 48.400 usec  
DE 6.00 usec  
TE 298.0 K  
D1 1.00000000 sec  
MCREST 0.00000000 sec  
MCNMRK 0.01500000 sec

===== CHANNEL f1 =====  
NUC1 1H  
P1 10.00 usec  
PL1 -6.00 dB  
SF01 500.1330885 MHz

F2 - Processing parameters  
SI 32768  
SF 500.1300134 MHz  
WDW EM  
SSB 0  
LB 0.30 Hz  
GB 0  
PC 1.00

1D NMR plot parameters  
CX 20.00 cm  
CY 12.50 cm  
F1P 9.000 ppm  
F1 4501.17 Hz  
F2P 0.000 ppm  
F2 0.00 Hz  
PPMCM 0.45000 ppm/cm  
HZCM 225.05849 Hz/cm

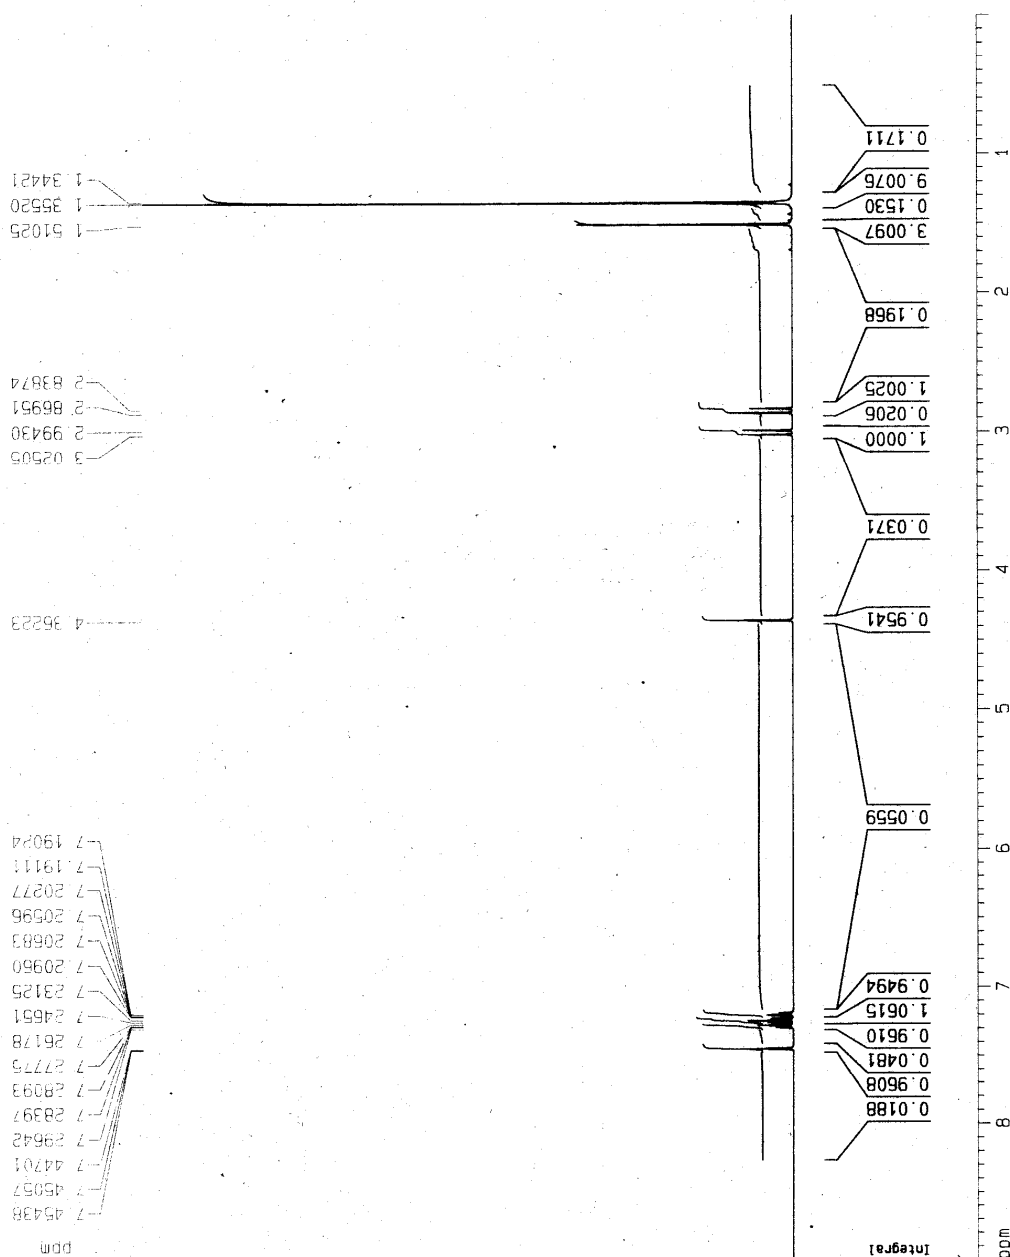

<sup>13</sup>C NMR (125.8 MHz, CDCl<sub>3</sub>) Spectrum of 4g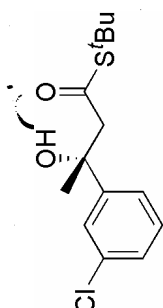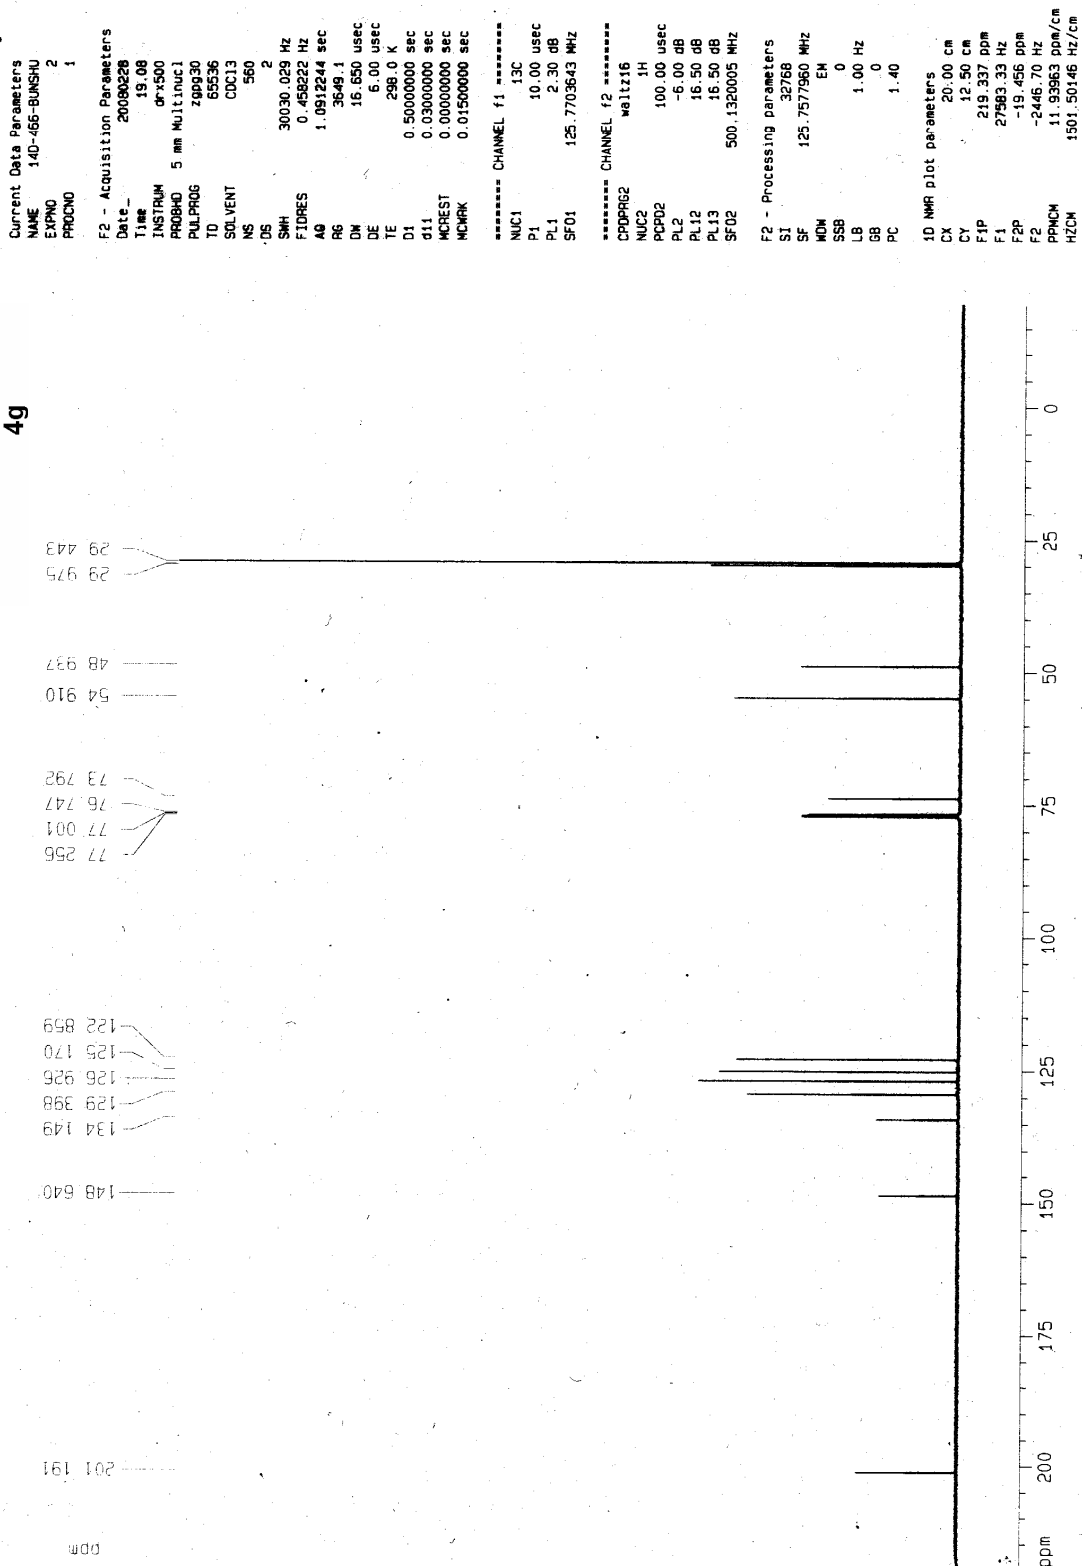

<sup>1</sup>H NMR (500 MHz, CDCl<sub>3</sub>) Spectrum of 4h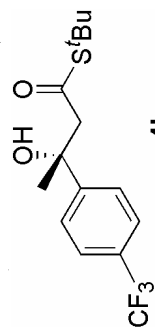

Current Data Parameters  
 NAME 140-548-PM  
 EXPNO 1  
 PROCNO 1

F2 - Acquisition Parameters  
 Date\_ 20080122  
 Time 15.29  
 INSTRUM drx500  
 PROBHD 5 mm Multinucl  
 PULPROG zg30  
 TD 65536  
 SOLVENT CDCl<sub>3</sub>  
 NS 16  
 DS 2  
 SWH 10330.578 Hz  
 FIDRES 0.157632 Hz  
 AQ 3.171923 sec  
 RG 101.5  
 DM 48.400 usec  
 DE 5.00 usec  
 TE 298.0 K  
 D1 1.00000000 sec  
 MCREST 0.00000000 sec  
 MCWRR 0.01500000 sec

===== CHANNEL f1 =====  
 NUC1 1H  
 P1 10.00 usec  
 PL1 -6.00 dB  
 SF01 500.1330885 MHz

F2 - Processing parameters  
 SI 32768  
 SF 500.1330131 MHz  
 WDW EM  
 SSB 0  
 LB 0.30 Hz  
 GB 0  
 PC 1.00

1D NMR plot parameters  
 CX 20.00 cm  
 CY 12.50 cm  
 FIP 9.000 ppm  
 F1 4501.17 Hz  
 F2 0.000 ppm  
 F2 0.00 Hz  
 PPMCM 0.45000 ppm/cm  
 HZCM 225.05849 Hz/cm

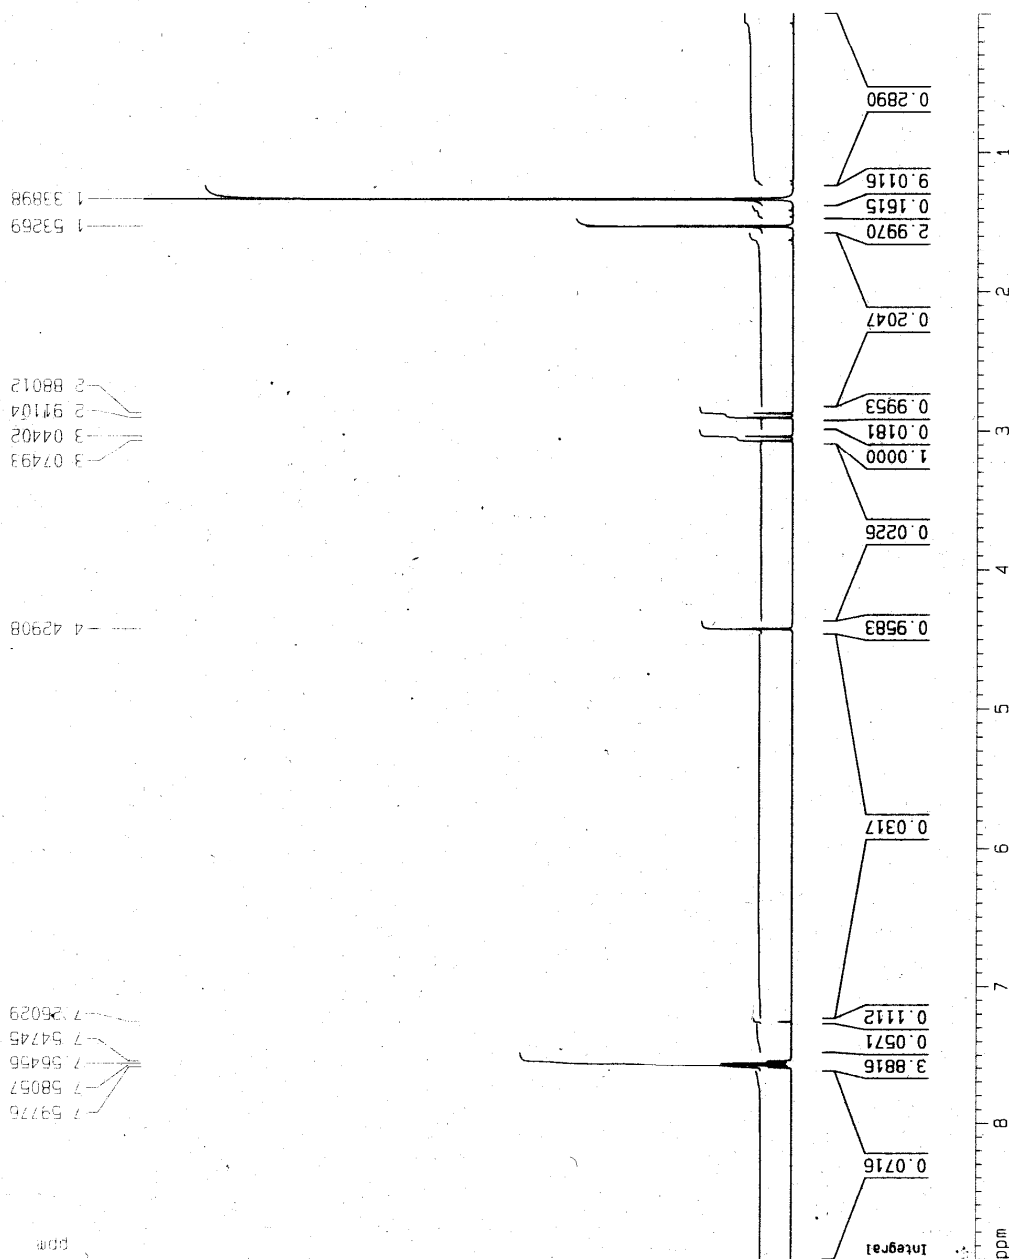

<sup>13</sup>C NMR (125.8 MHz, CDCl<sub>3</sub>) Spectrum of 4h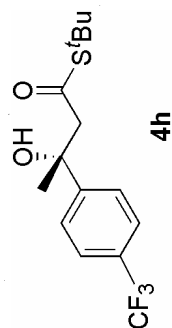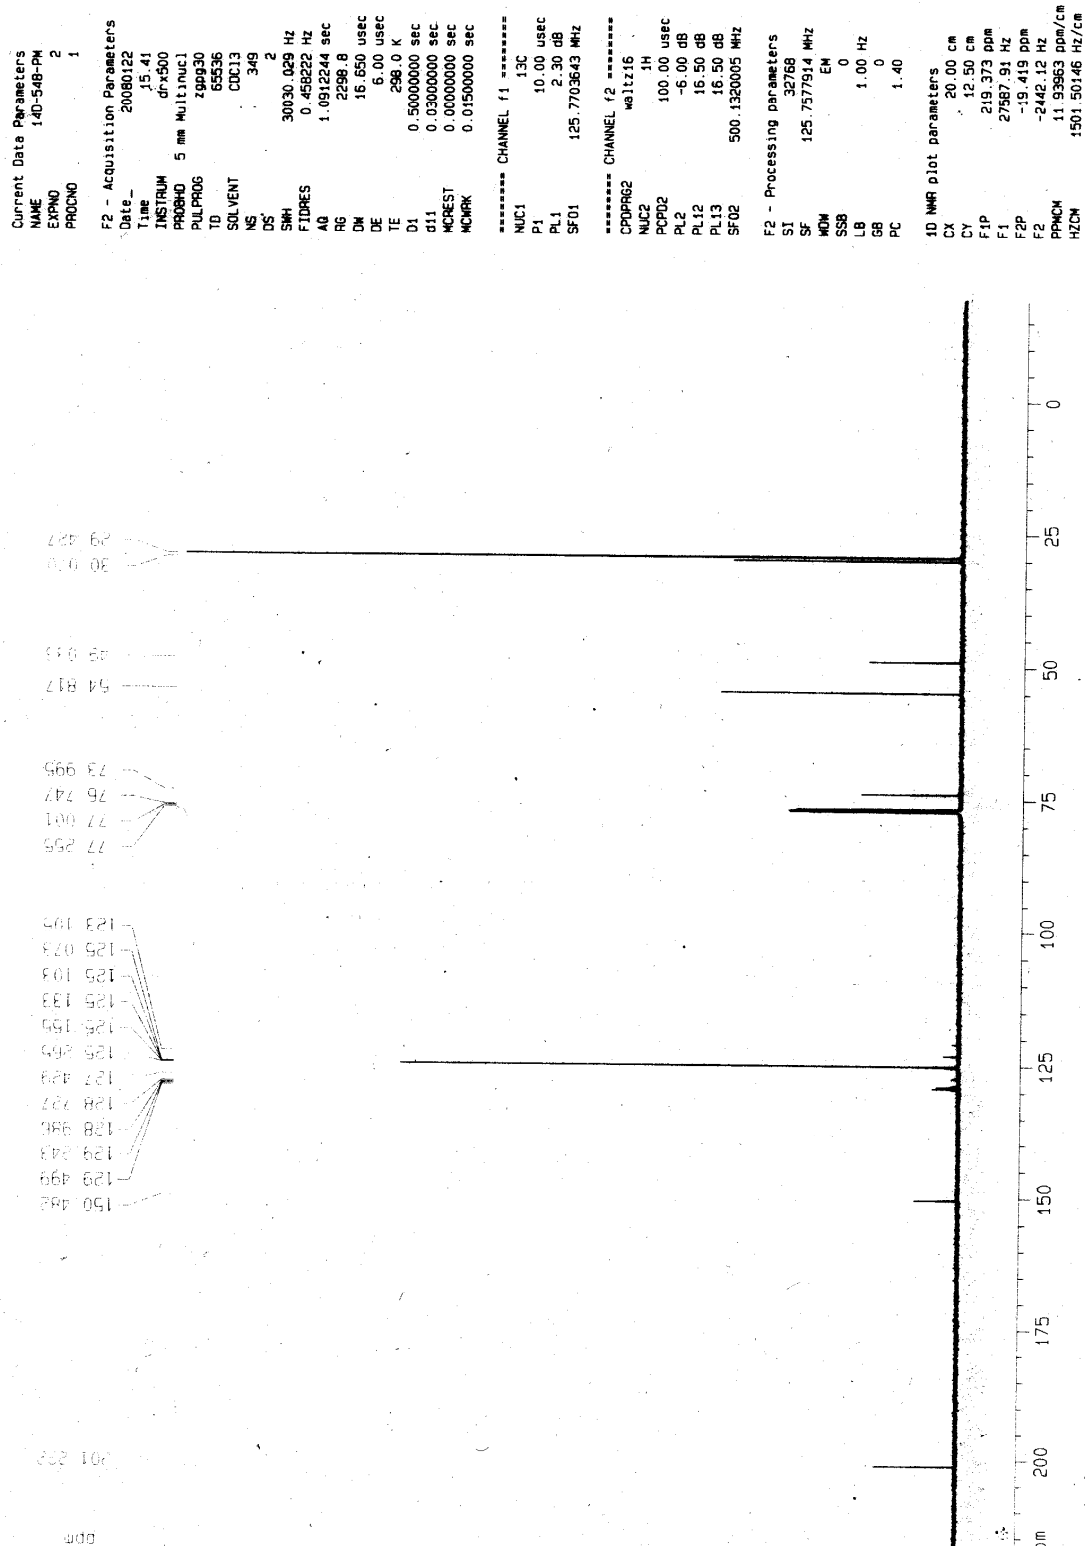

<sup>1</sup>H NMR (500 MHz, CDCl<sub>3</sub>) Spectrum of 4i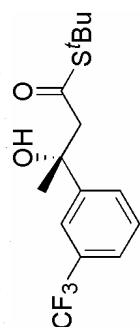

4i

## Current Data Parameters

NAME 140-468-BUNSHU  
EXPNO 1  
PROCNO 1

## F2 - Acquisition Parameters

Date\_ 20080228  
Time 18.44  
INSTRUM drx500  
PROBHD 5 mm Multinucl  
PULPROG zg30  
TD 65536  
SOLVENT CDCl<sub>3</sub>  
NS 32  
DS 2  
SMH 10330.578 Hz  
FIDRES 0.157632 Hz  
AQ 3.171923 sec  
RG 45.3  
DM 48.400 usec  
DE 6.00 usec  
TE 298.0 K  
D1 1.0000000 sec  
MCREST 0.0000000 sec  
MCWIRK 0.0150000 sec

## ===== CHANNEL f1 =====

NUC1 1H  
P1 10.00 usec  
PL1 -6.00 dB  
SF01 500.1330885 MHz

## F2 - Processing parameters

SI 32768  
SF 500.1330134 MHz  
WDW EM  
SSB 0  
LB 0.30 Hz  
GB 0  
PC 1.00

## 1D NMR plot parameters

CX 20.00 cm  
CY 12.50 cm  
F1P 9.000 ppm  
F1 4501.17 Hz  
F2P 0.000 ppm  
F2 0.00 Hz  
PPMCM 0.45000 ppm/cm  
HZCM 225.05849 Hz/cm

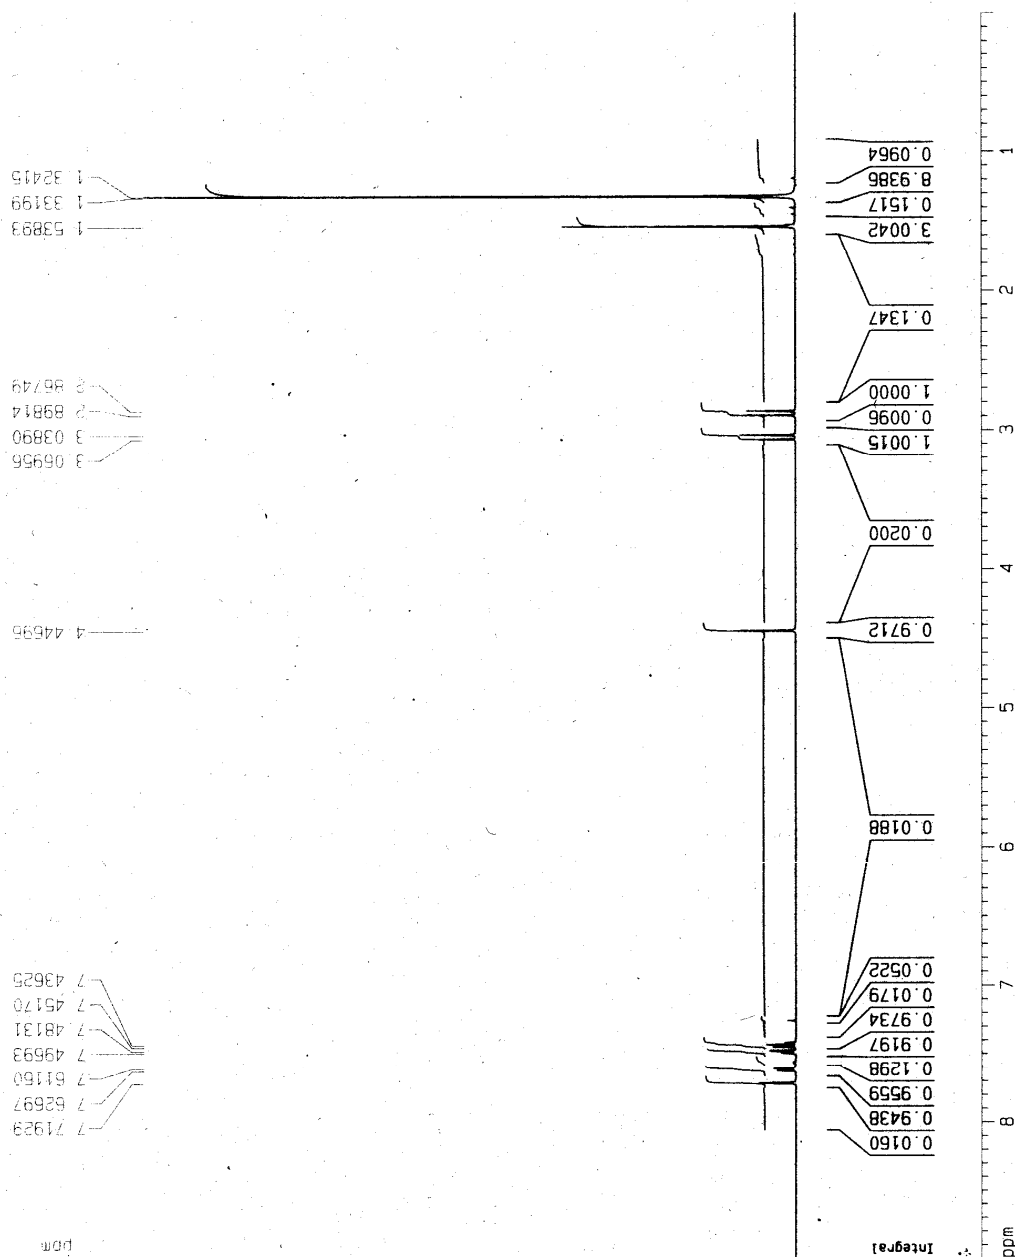



<sup>13</sup>C NMR (125.8 MHz, CDCl<sub>3</sub>) Spectrum of 4i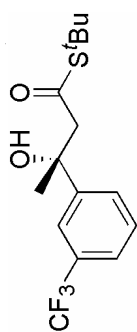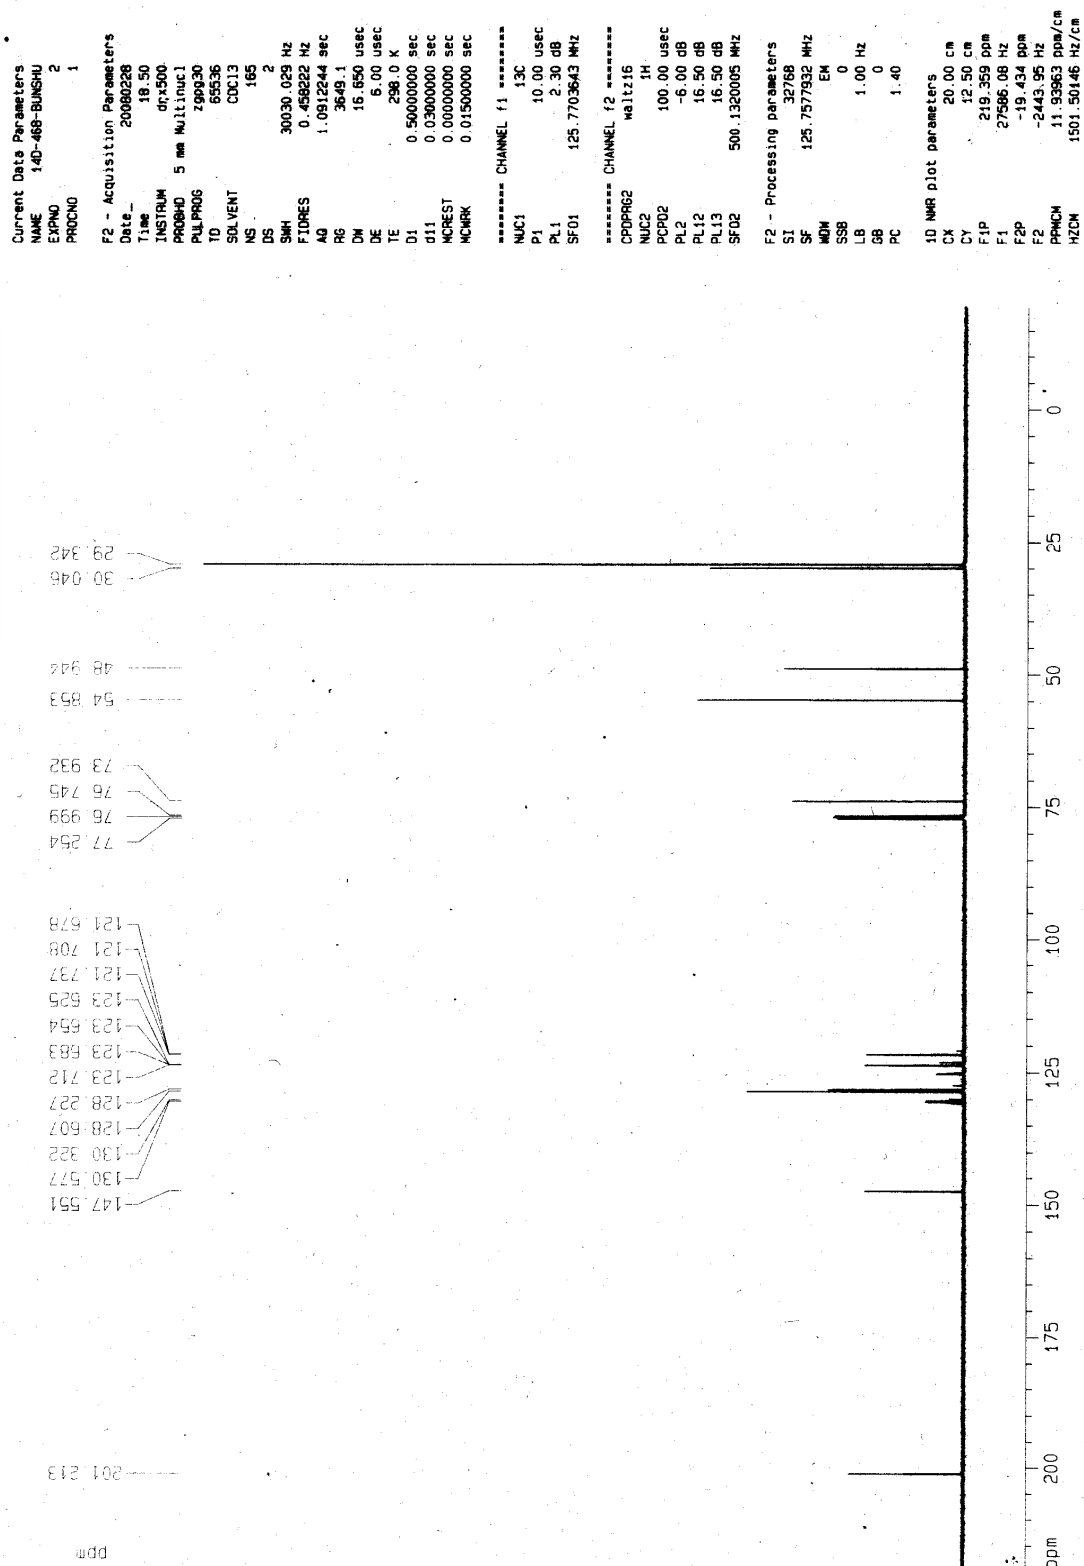

<sup>1</sup>H NMR (500 MHz, CDCl<sub>3</sub>) Spectrum of 4j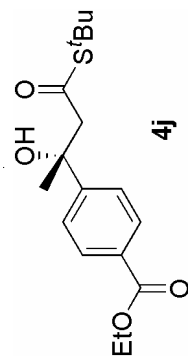

4j

## Current Data Parameters

NAME 140-571-PA  
EXPNO 1  
PROCNO 1

## F2 - Acquisition Parameters

Date\_ 20060307  
Time 18.58  
INSTRUM drx500  
PROBHD 5 mm Multinuc1  
PULPROG zg30  
TD 65536  
SOLVENT CDCl3  
NS 32  
DS 2  
SWH 10330.578 Hz  
FIDRES 0.157532 Hz  
AQ 3.1719923 sec  
RG 287.4  
DM 48.400 usec  
DE 6.00 usec  
TE 298.0 K  
D1 1.00000000 sec  
MCREST 0.00000000 sec  
MCHWK 0.01500000 sec

## \*\*\*\*\* CHANNEL f1 \*\*\*\*\*

NUC1 1H  
P1 10.00 usec  
PL1 -6.00 dB  
SF01 500.1330885 MHz

## F2 - Processing parameters

SI 32768  
SF 500.1300137 MHz  
WDW EM  
SSB 0  
LB 0.30 Hz  
GB 0  
PC 1.00

## 1D NMR plot parameters

CX 20.00 cm  
CY 12.50 cm  
F1P 9.000 ppm  
F1 4501.17 Hz  
F2P 0.000 ppm  
F2 0.00 Hz  
PPMCM 0.45000 ppm/cm  
HZCM 225.05849 Hz/cm

1 34090  
1 37372  
1 38792  
1 40281  
1 52491  
1 59578

2 88028  
2 91128  
3 08016  
3 09118

4 41214  
4 38889  
4 37462  
4 36039  
4 34512

7 25981  
7 49556  
7 49885  
7 50894  
7 51236  
7 99620  
7 99953  
8 00955  
8 01329

ppm

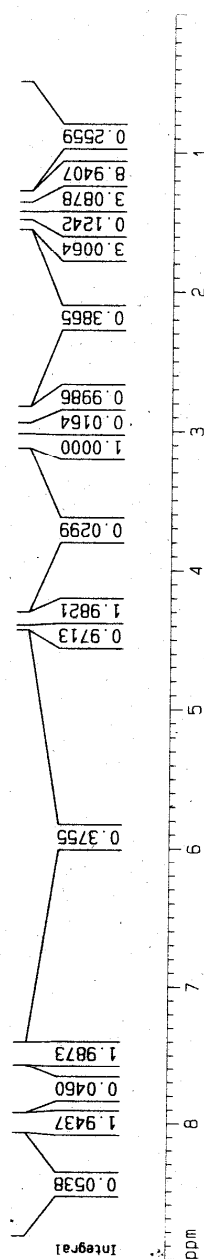

<sup>13</sup>C NMR (125.8 MHz, CDCl<sub>3</sub>) Spectrum of 4j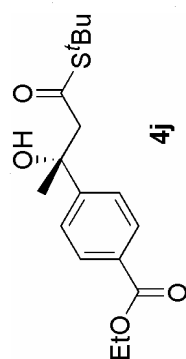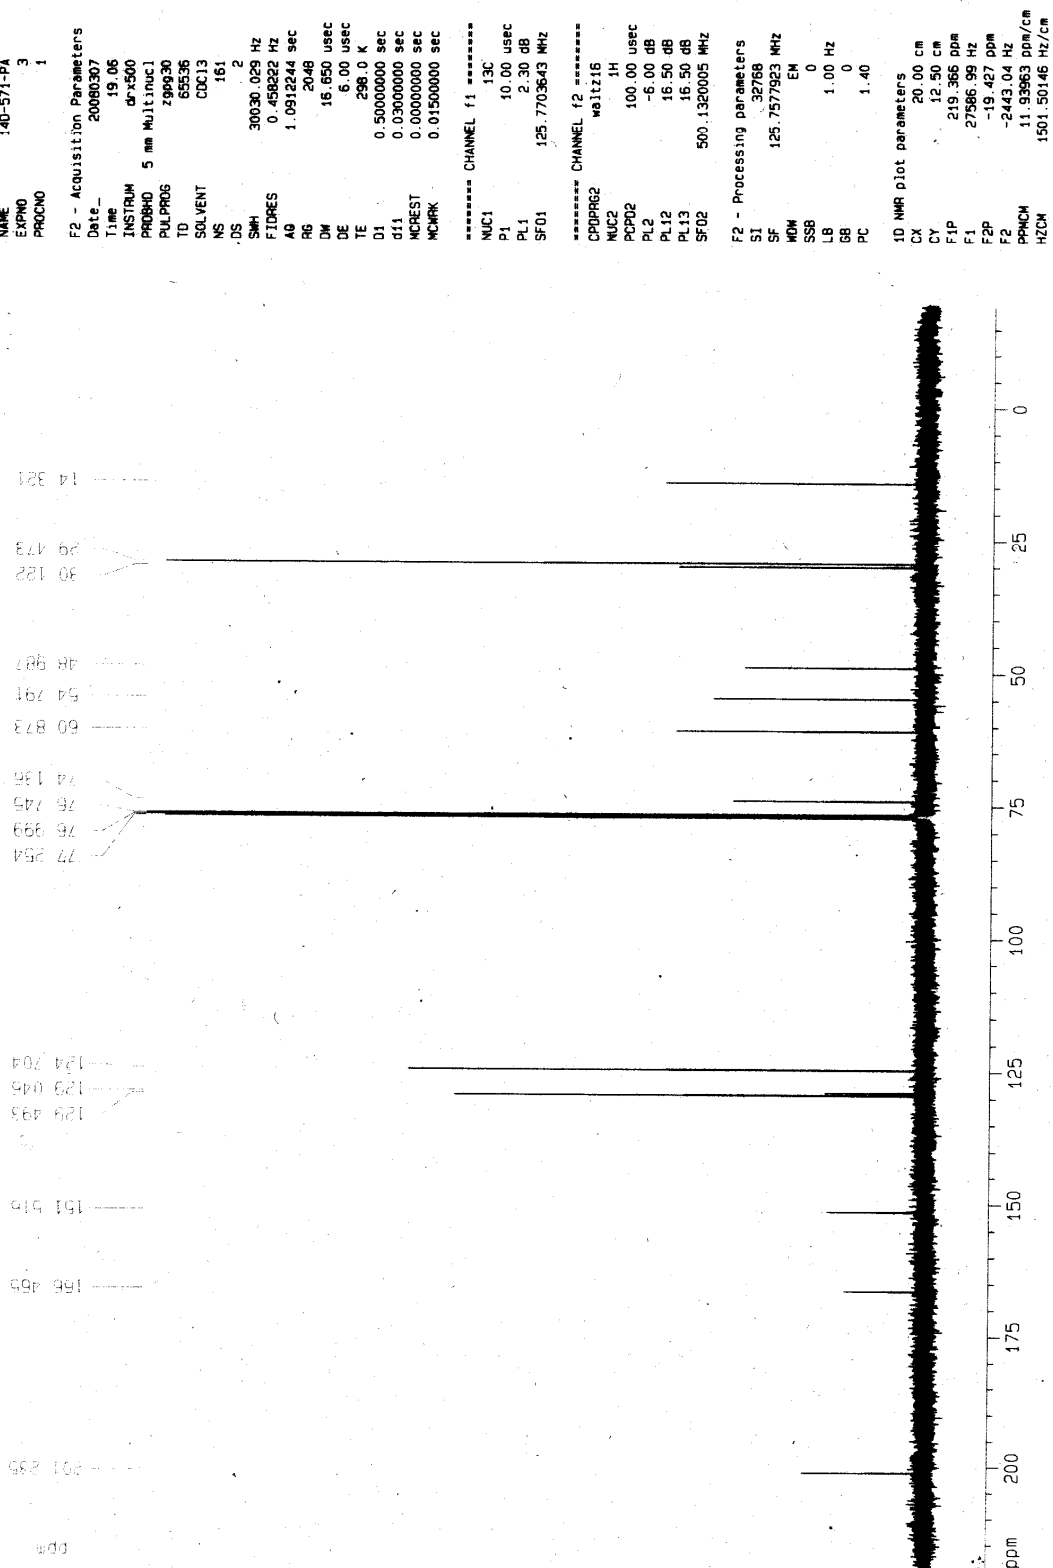

<sup>1</sup>H NMR (500 MHz, CDCl<sub>3</sub>) Spectrum of 4k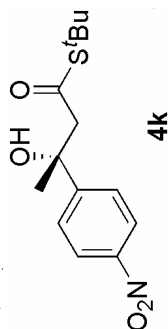

Current Data Parameters  
 NAME 140-516-PA  
 EXPNO 1  
 PROCNO 1

F2 - Acquisition Parameters  
 Date\_ 20071102  
 Time 18.24  
 INSTRUM drx500  
 PROBHD 5 mm Multinucl  
 PULPROG zg30  
 TD 65536  
 SOLVENT CDCl<sub>3</sub>  
 NS 16  
 DS 2  
 SMH 10330.578 Hz  
 FIDRES 0.157632 Hz  
 AQ 3.1719923 sec  
 RG 161.3  
 DW 48.400 usec  
 DE 6.00 usec  
 TE 296.1 K  
 D1 1.00000000 sec  
 MCREST 0.00000000 sec  
 MCWIRK 0.01500000 sec

===== CHANNEL f1 =====  
 NUC1 <sup>1</sup>H  
 P1 10.00 usec  
 PL1 -6.00 dB  
 SF01 500.1330885 MHz

F2 - Processing parameters  
 SI 32768  
 SF 500.1300143 MHz  
 WDW EM  
 SSB 0  
 LB 0.30 Hz  
 GB 0  
 PC 1.00

1D NMR plot parameters  
 CX 20.00 cm  
 CY 12.50 cm  
 F1P 9.000 ppm  
 F1 4501.17 Hz  
 F2P 0.000 ppm  
 F2 0.00 Hz  
 PPMCM 0.45000 ppm/cm  
 HZCM 225.05852 Hz/cm

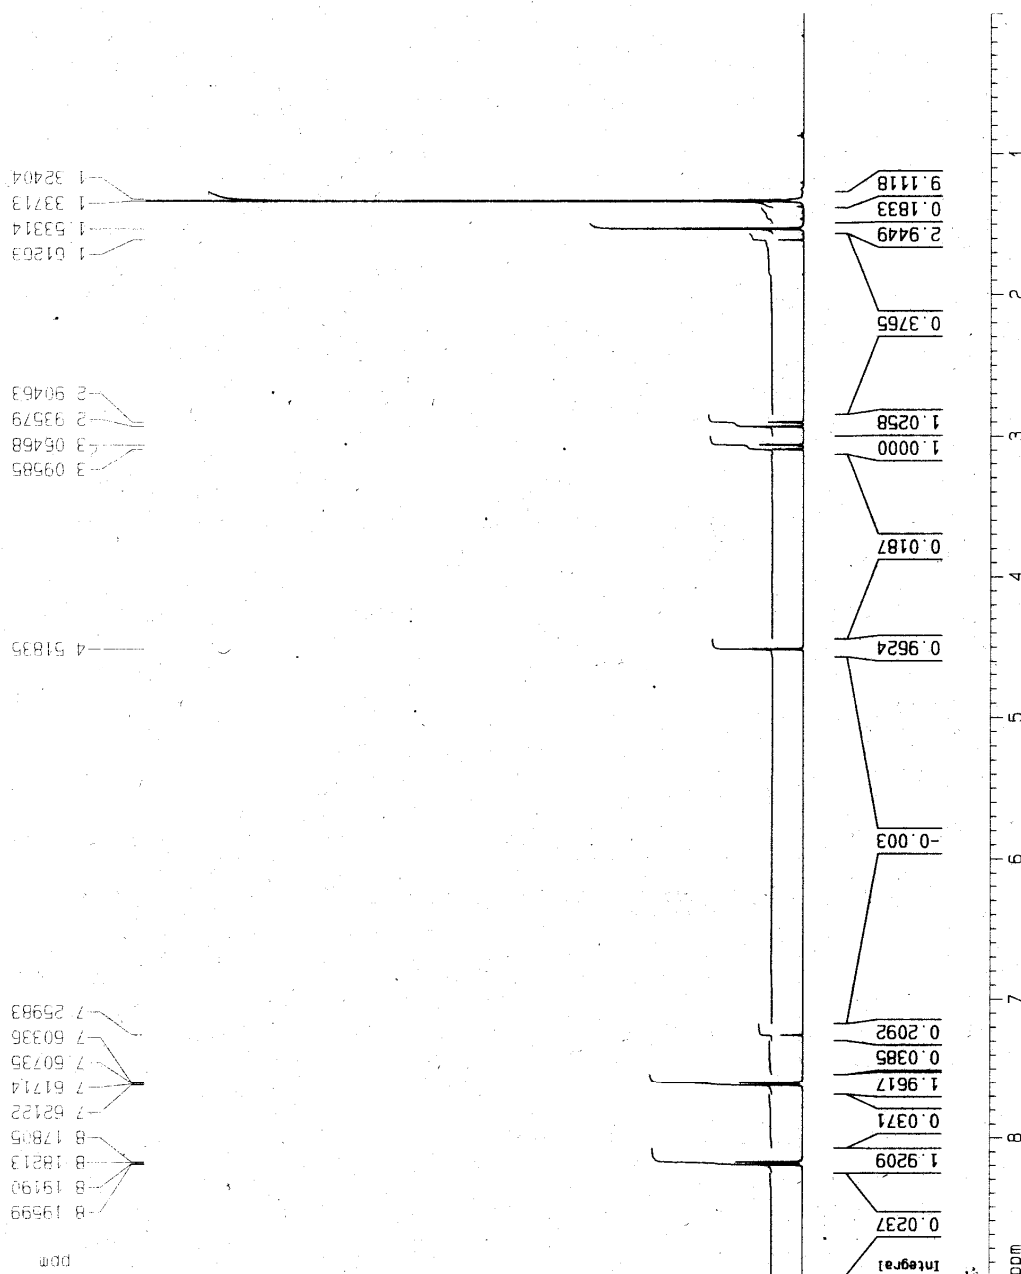

<sup>13</sup>C NMR (125.8 MHz, CDCl<sub>3</sub>) Spectrum of 4k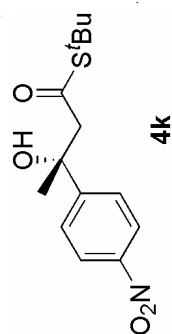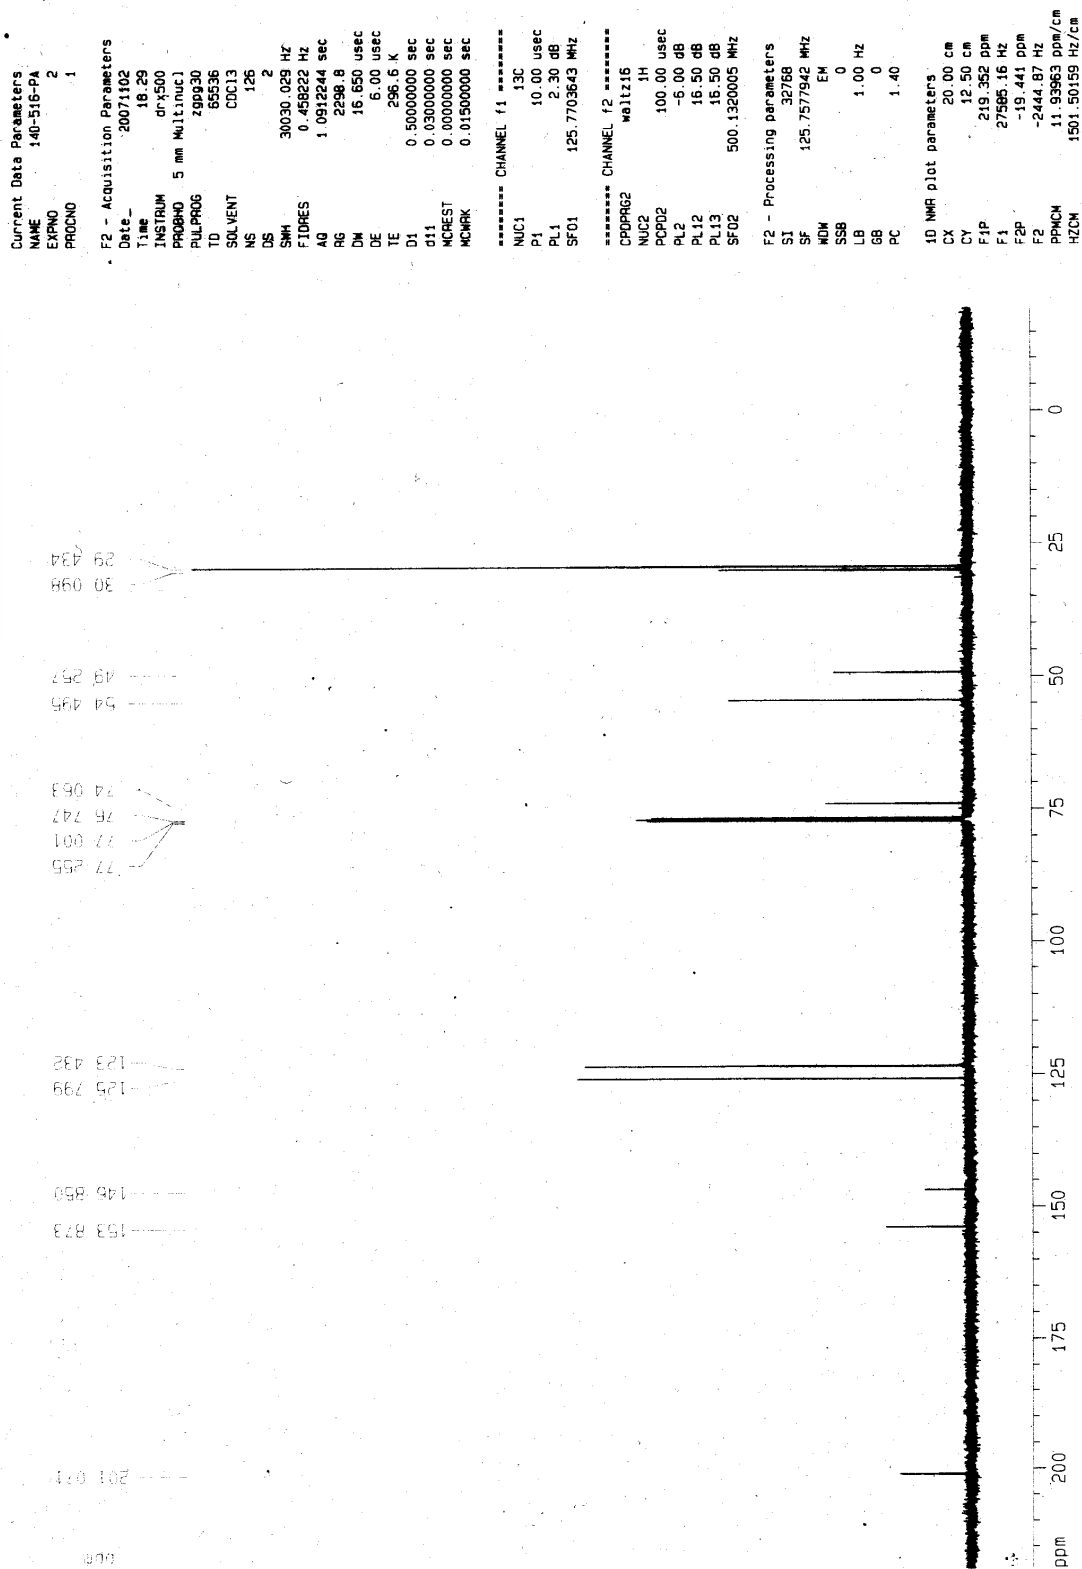

<sup>1</sup>H NMR (500 MHz, CDCl<sub>3</sub>) Spectrum of 4I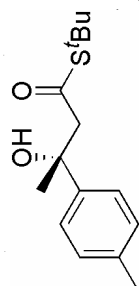

Current Data Parameters  
 NAME 140-MePhCDet  
 EXPNO 1  
 PROCNO 1

F2 - Acquisition Parameters  
 Date\_ 20080303  
 Time 20.27  
 INSTRUM drx500  
 PROBHD 5 mm Multinuc1  
 PULPROG zg30  
 TD 65536  
 SOLVENT CDCl3  
 NS 32  
 DS 2  
 SWH 10330.578 Hz  
 FIDRES 0.157632 Hz  
 AQ 3.1719823 sec  
 RG 45.3  
 DW 48.400 usec  
 DE 6.00 usec  
 TE 298.0 K  
 D1 1.00000000 sec  
 MCREST 0.00000000 sec  
 MCWRR 0.01500000 sec

===== CHANNEL f1 =====  
 NUC1 1H  
 P1 10.00 usec  
 PL1 -6.00 dB  
 SF01 500.1330885 MHz

F2 - Processing parameters  
 SI 32768  
 SF 500.1300134 MHz  
 WDW EM  
 SSB 0  
 LB 0.30 Hz  
 GB 0  
 PC 1.00

1D NMR plot parameters  
 CX 20.00 cm  
 CY 12.50 cm  
 FIP 9.000 ppm  
 F1 4501.17 Hz  
 F2 0.000 ppm  
 F2 0.00 Hz  
 PPMCH 0.45000 ppm/cm  
 HZCM 225.05849 Hz/cm

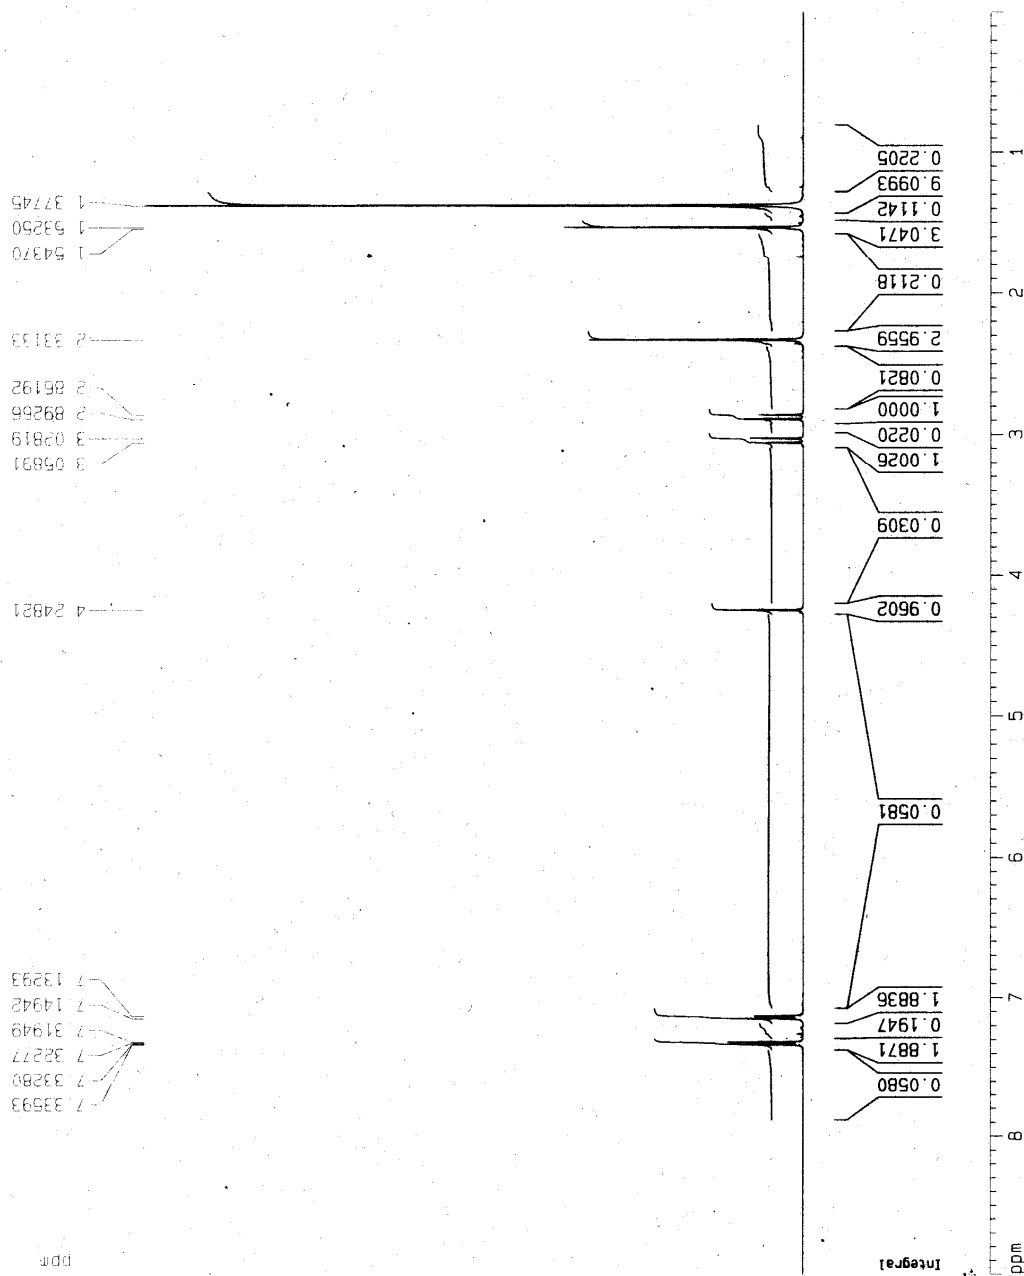

<sup>13</sup>C NMR (125.8 MHz, CDCl<sub>3</sub>) Spectrum of 4I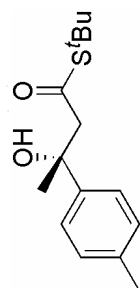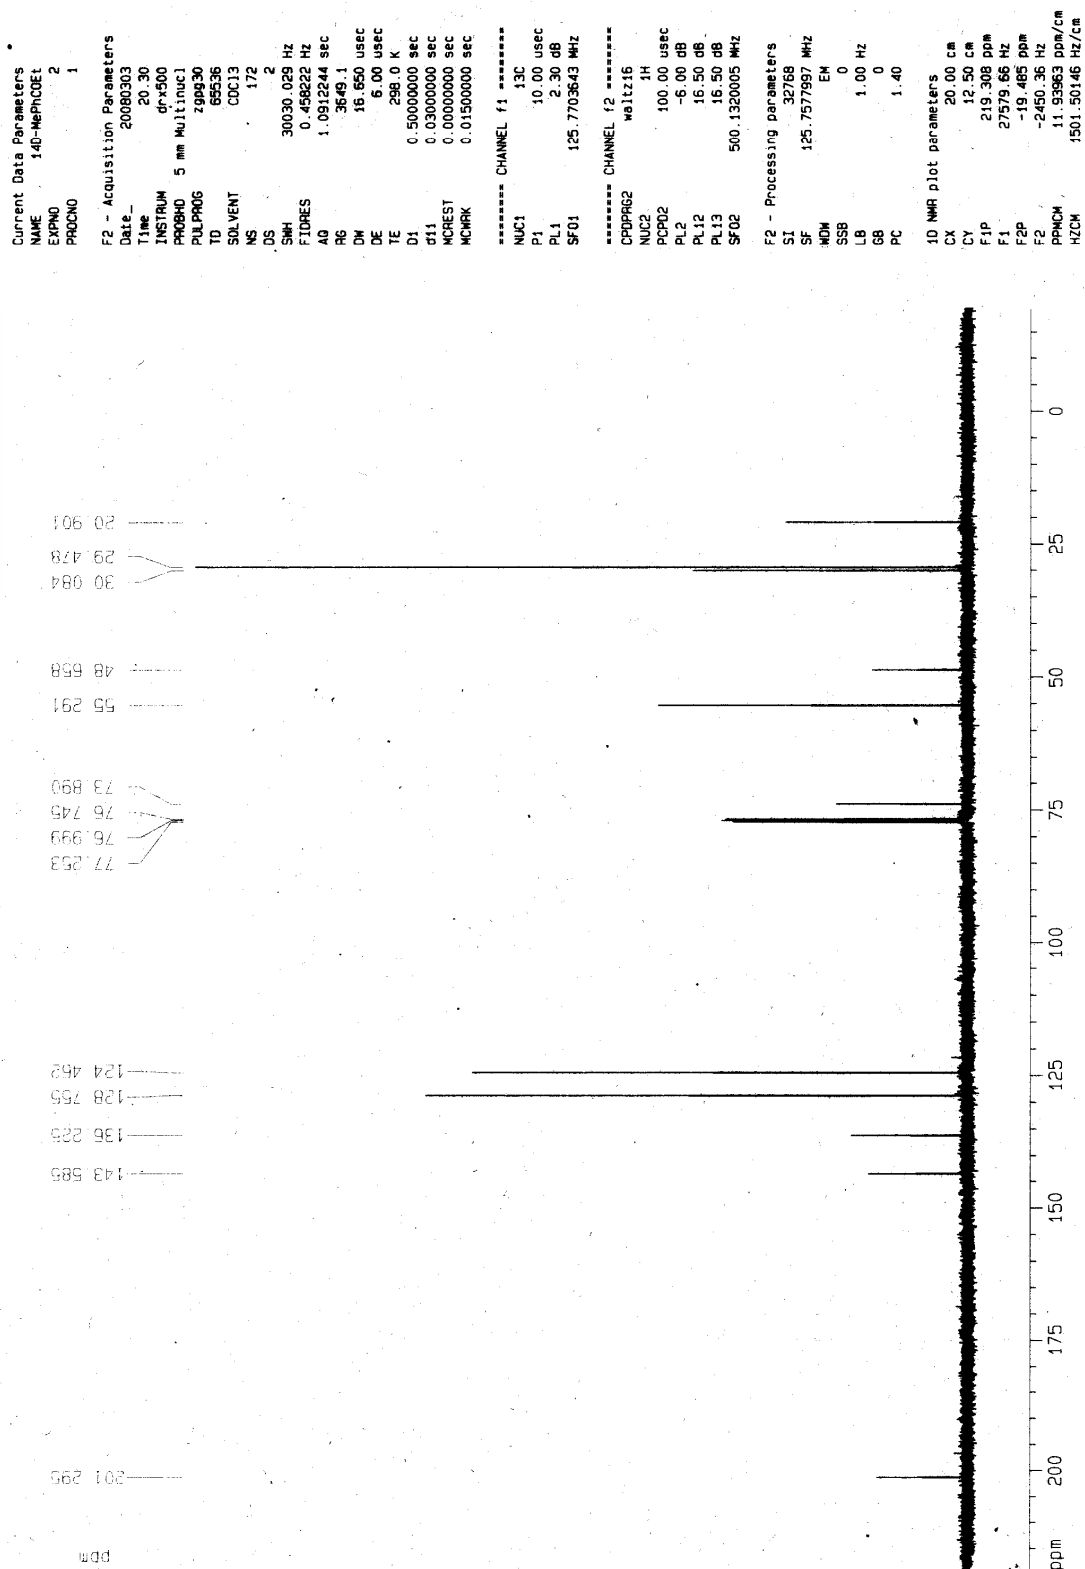

<sup>1</sup>H NMR (500 MHz, CDCl<sub>3</sub>) Spectrum of 4m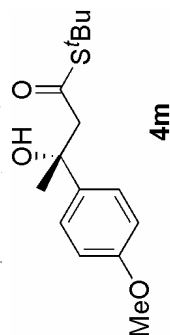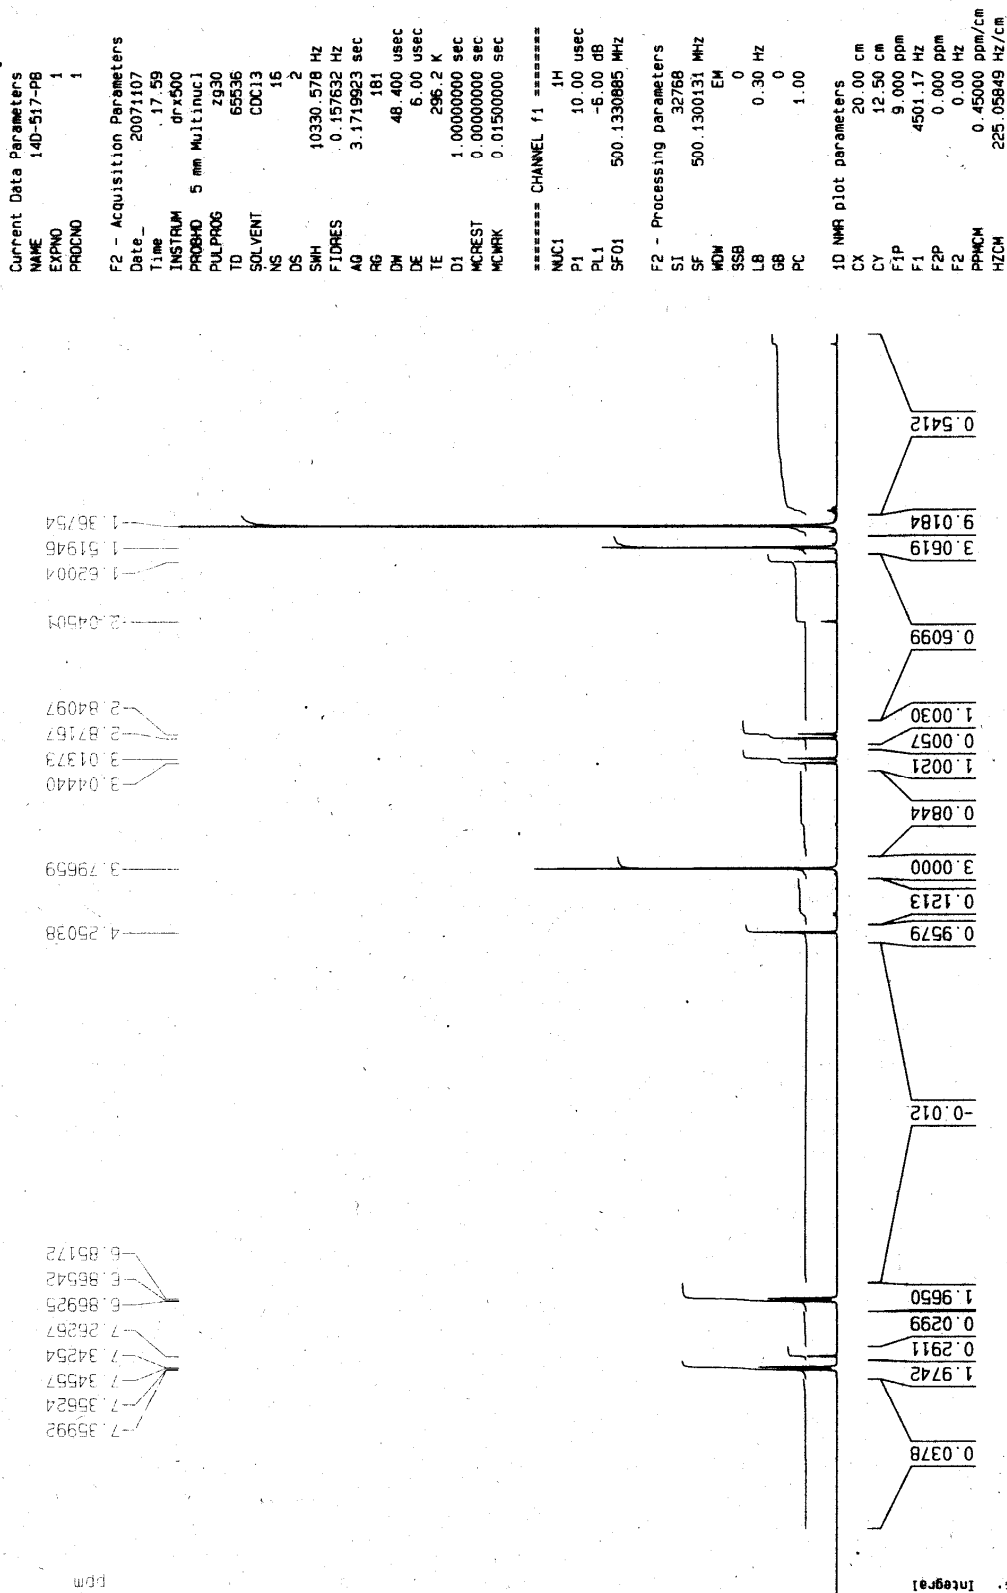



<sup>13</sup>C NMR (125.8 MHz, CDCl<sub>3</sub>) Spectrum of 4m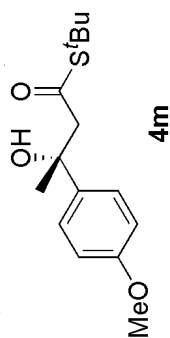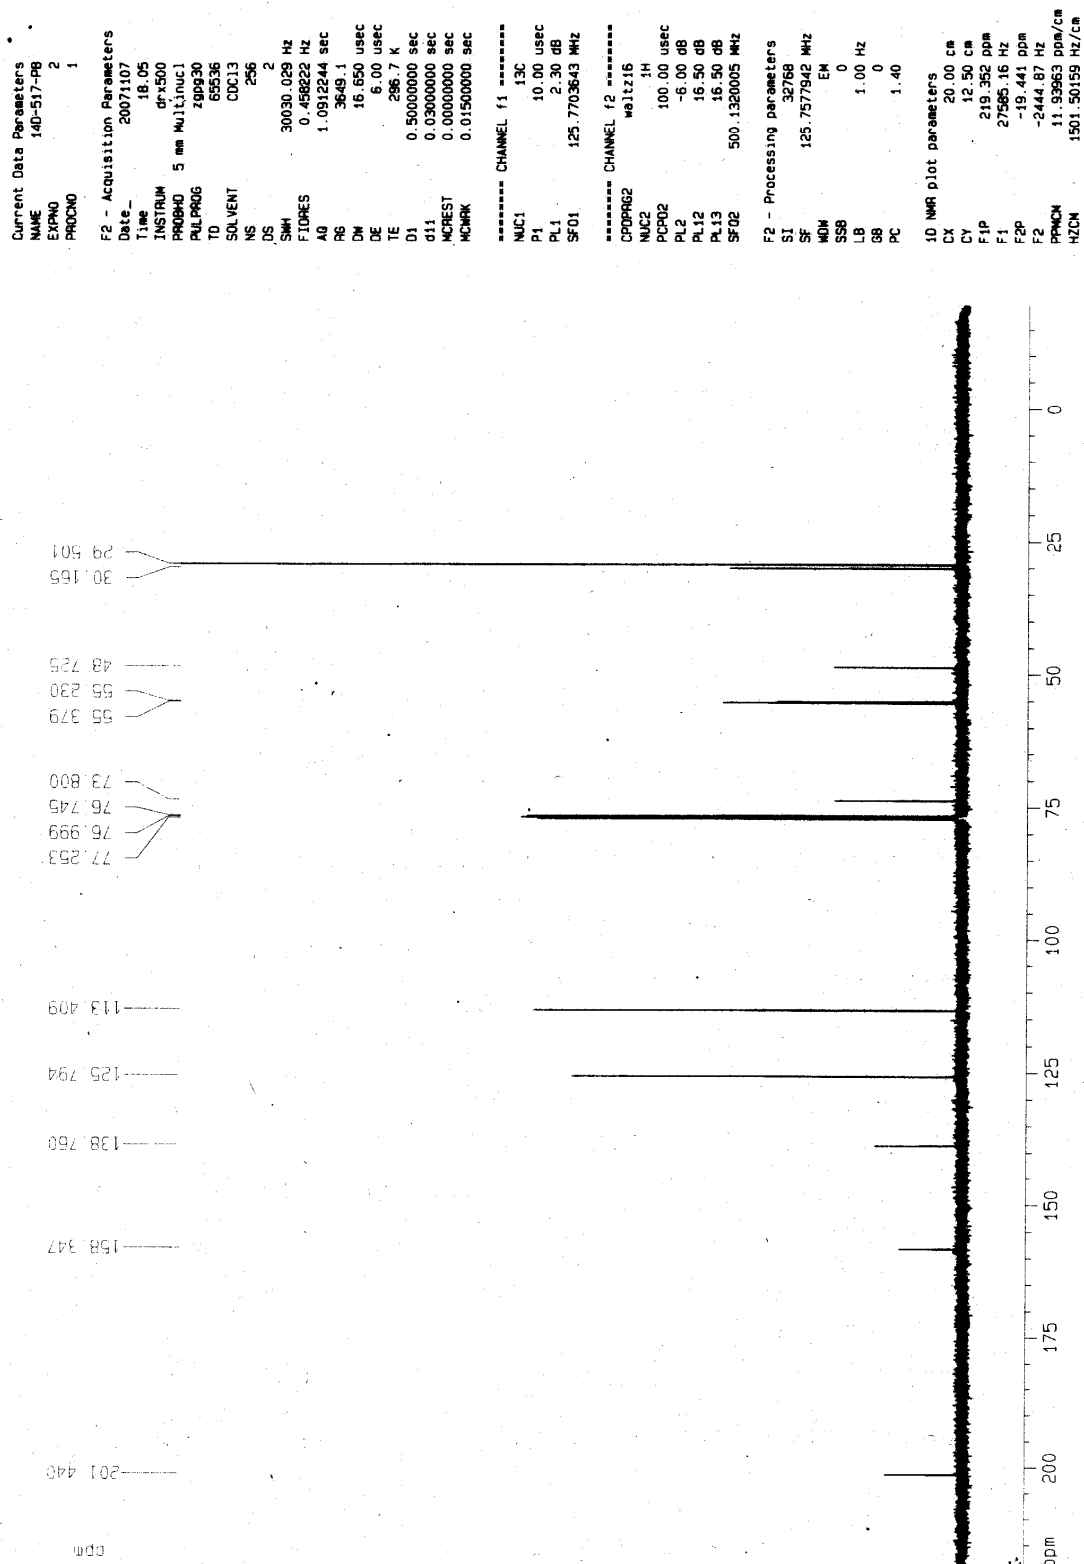

<sup>1</sup>H NMR (500 MHz, CDCl<sub>3</sub>) Spectrum of 4n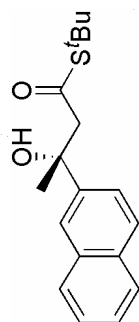

4n

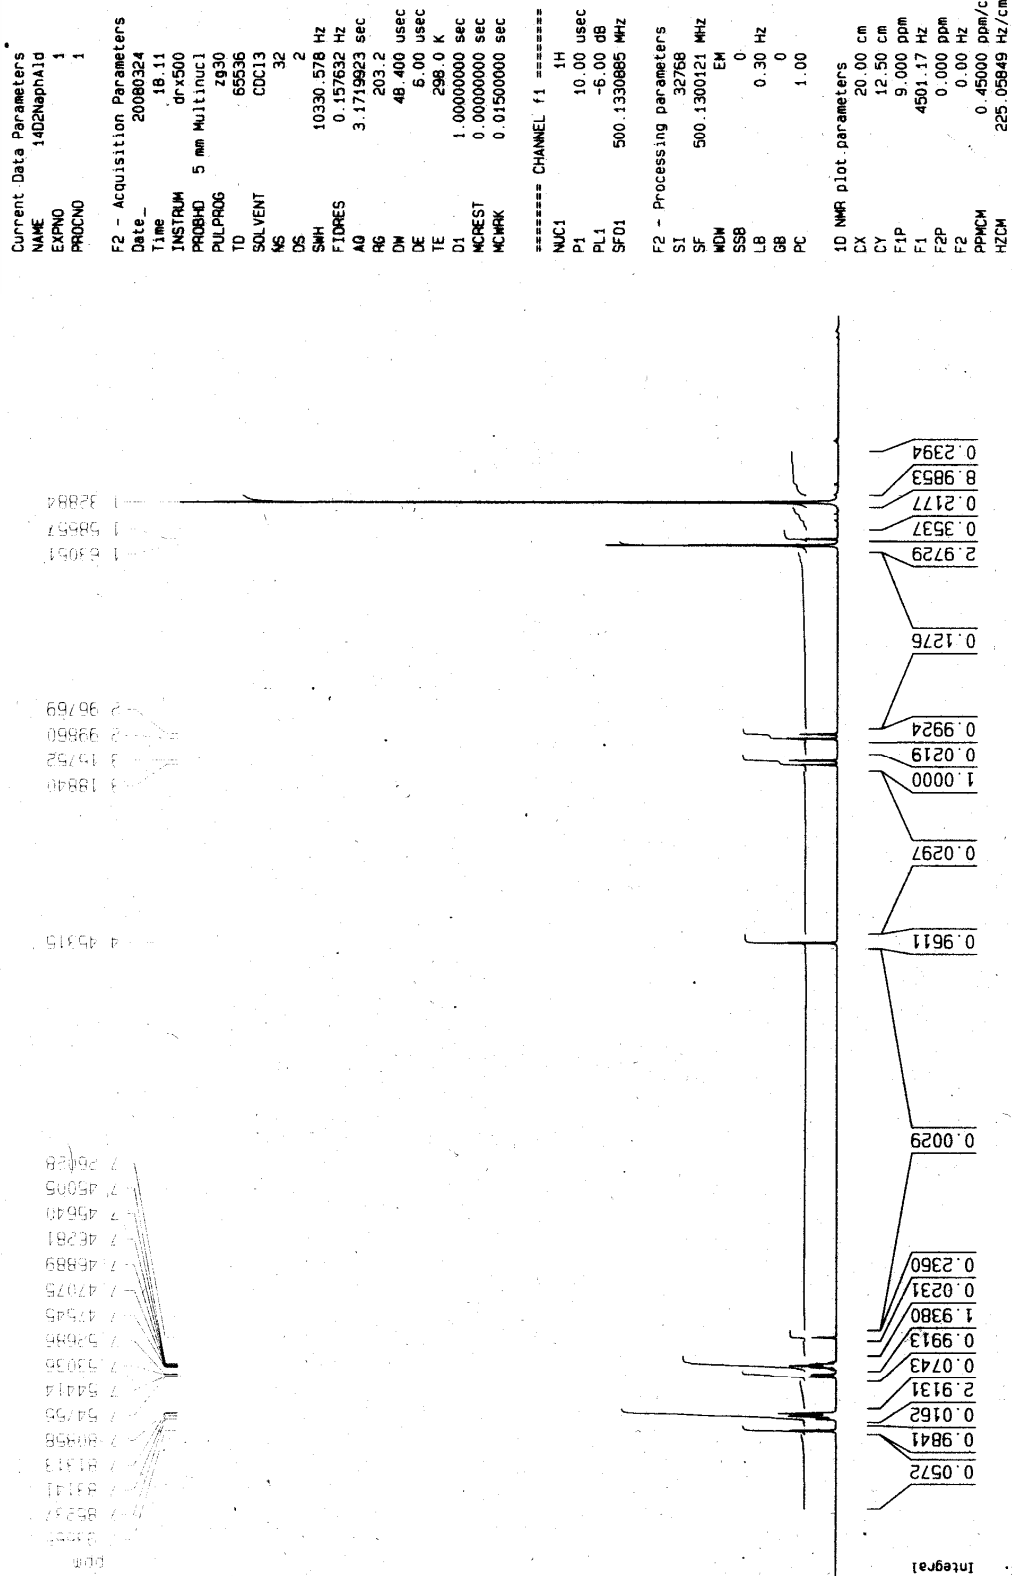

<sup>13</sup>C NMR (125.8 MHz, CDCl<sub>3</sub>) Spectrum of 4n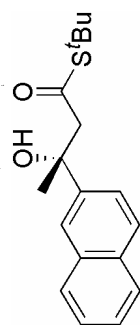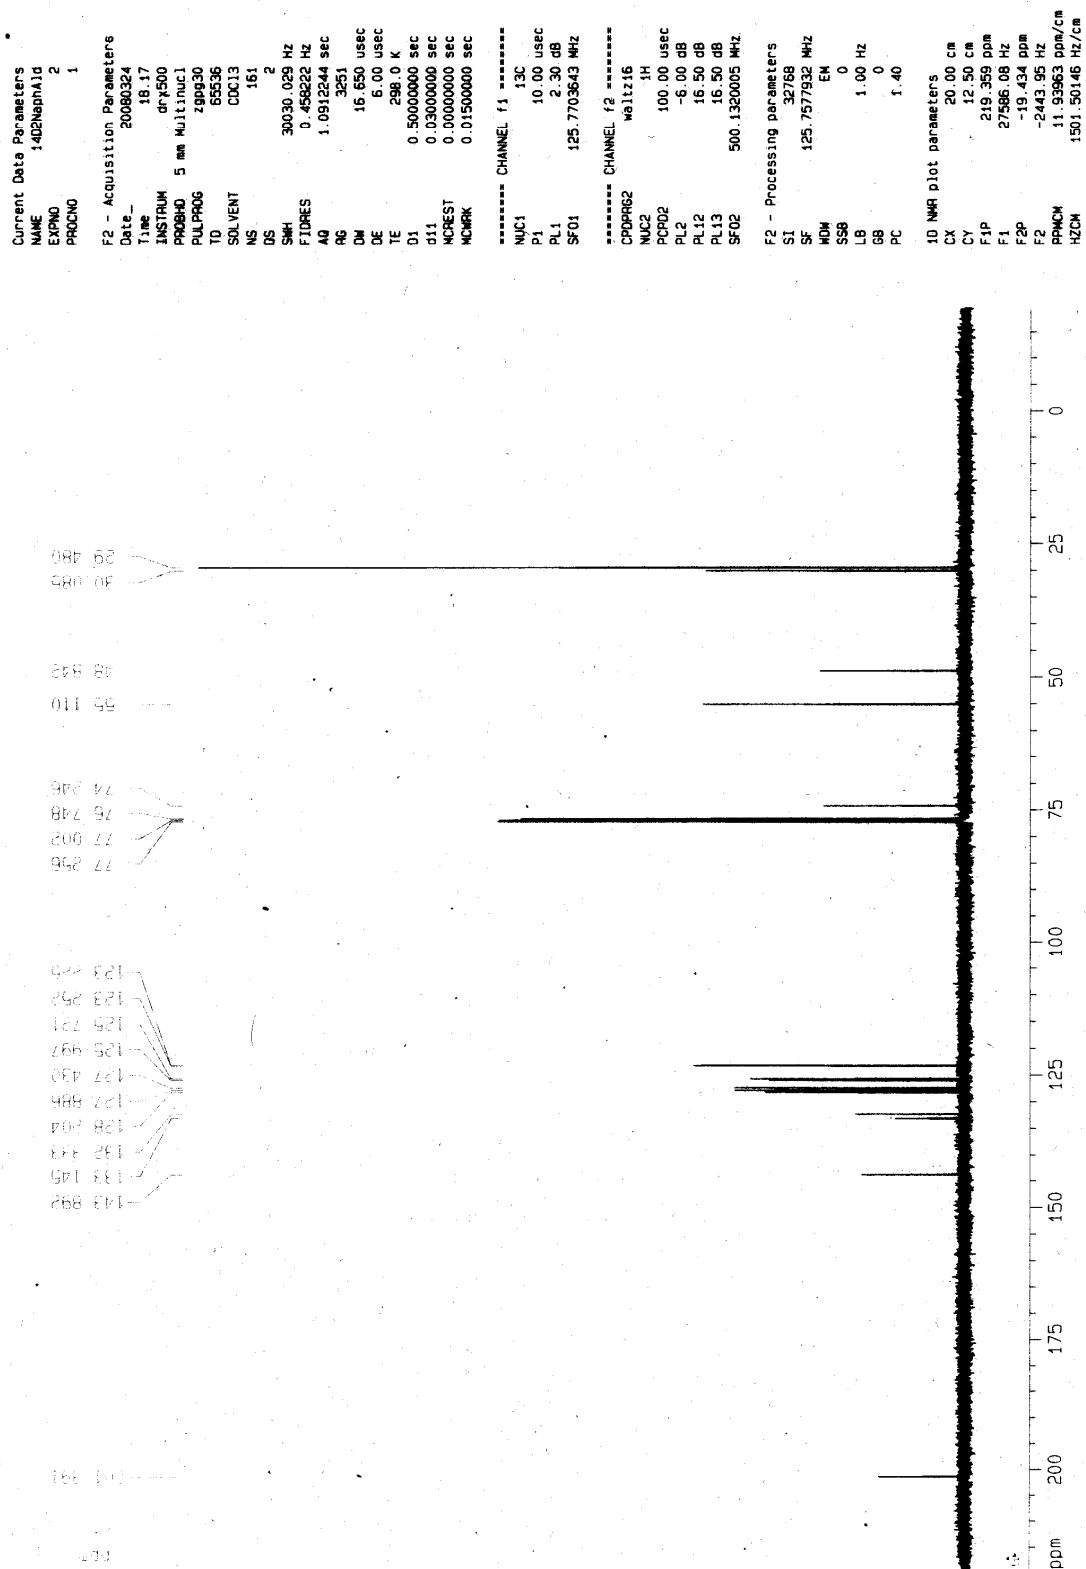

<sup>1</sup>H NMR (500 MHz, CDCl<sub>3</sub>) Spectrum of 4o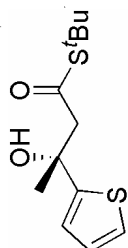

4o

Current Data Parameters  
 NAME 14D-528-PA  
 EXPNO 1  
 PROCNO 1

F2 - Acquisition Parameters  
 Date\_ 20071126  
 Time 17.32  
 INSTRUM drx500  
 PROBD 5 mm Multinuc1  
 PULPROG zg30  
 TD 65536  
 SOLVENT CDCl3  
 NS 16  
 DS 2  
 SWH 10330.578 Hz  
 FIDRES 0.157632 Hz  
 AQ 3.1719923 sec  
 RG 101.6  
 DM 48.400 usec  
 DE 6.00 usec  
 TE 298.0 K  
 D1 1.00000000 sec  
 MCREST 0.00000000 sec  
 MCWRR 0.01500000 sec

===== CHANNEL f1 =====  
 NUC1 <sup>1</sup>H  
 P1 10.00 usec  
 PL1 -6.00 dB  
 SF01 500.1330885 MHz

F2 - Processing parameters  
 SI 32768  
 SF 500.1300143 MHz  
 WDW EM  
 SSB 0  
 LB 0.30 Hz  
 GB 0  
 PC 1.00

1D NMR plot parameters  
 CX 20.00 cm  
 CY 0.00 cm  
 F1P 9.000 ppm  
 F1 4501.17 Hz  
 F2P 0.000 ppm  
 F2 0.00 Hz  
 PPMCM 0.45000 ppm/cm  
 HZCM 225.05849 Hz/cm

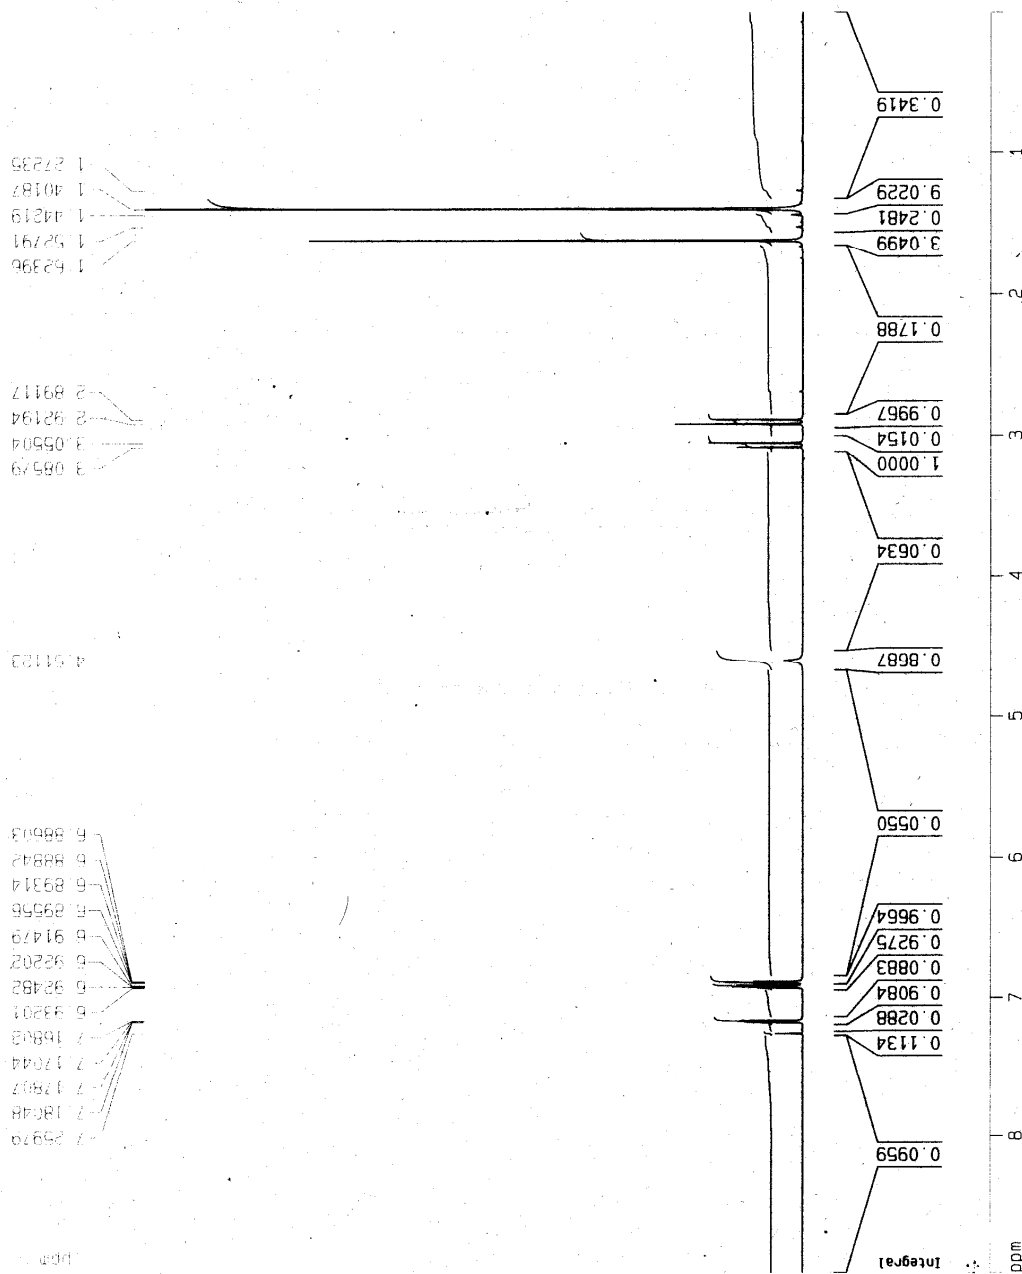

<sup>13</sup>C NMR (125.8 MHz, CDCl<sub>3</sub>) Spectrum of 4o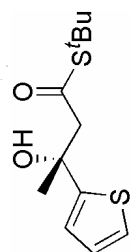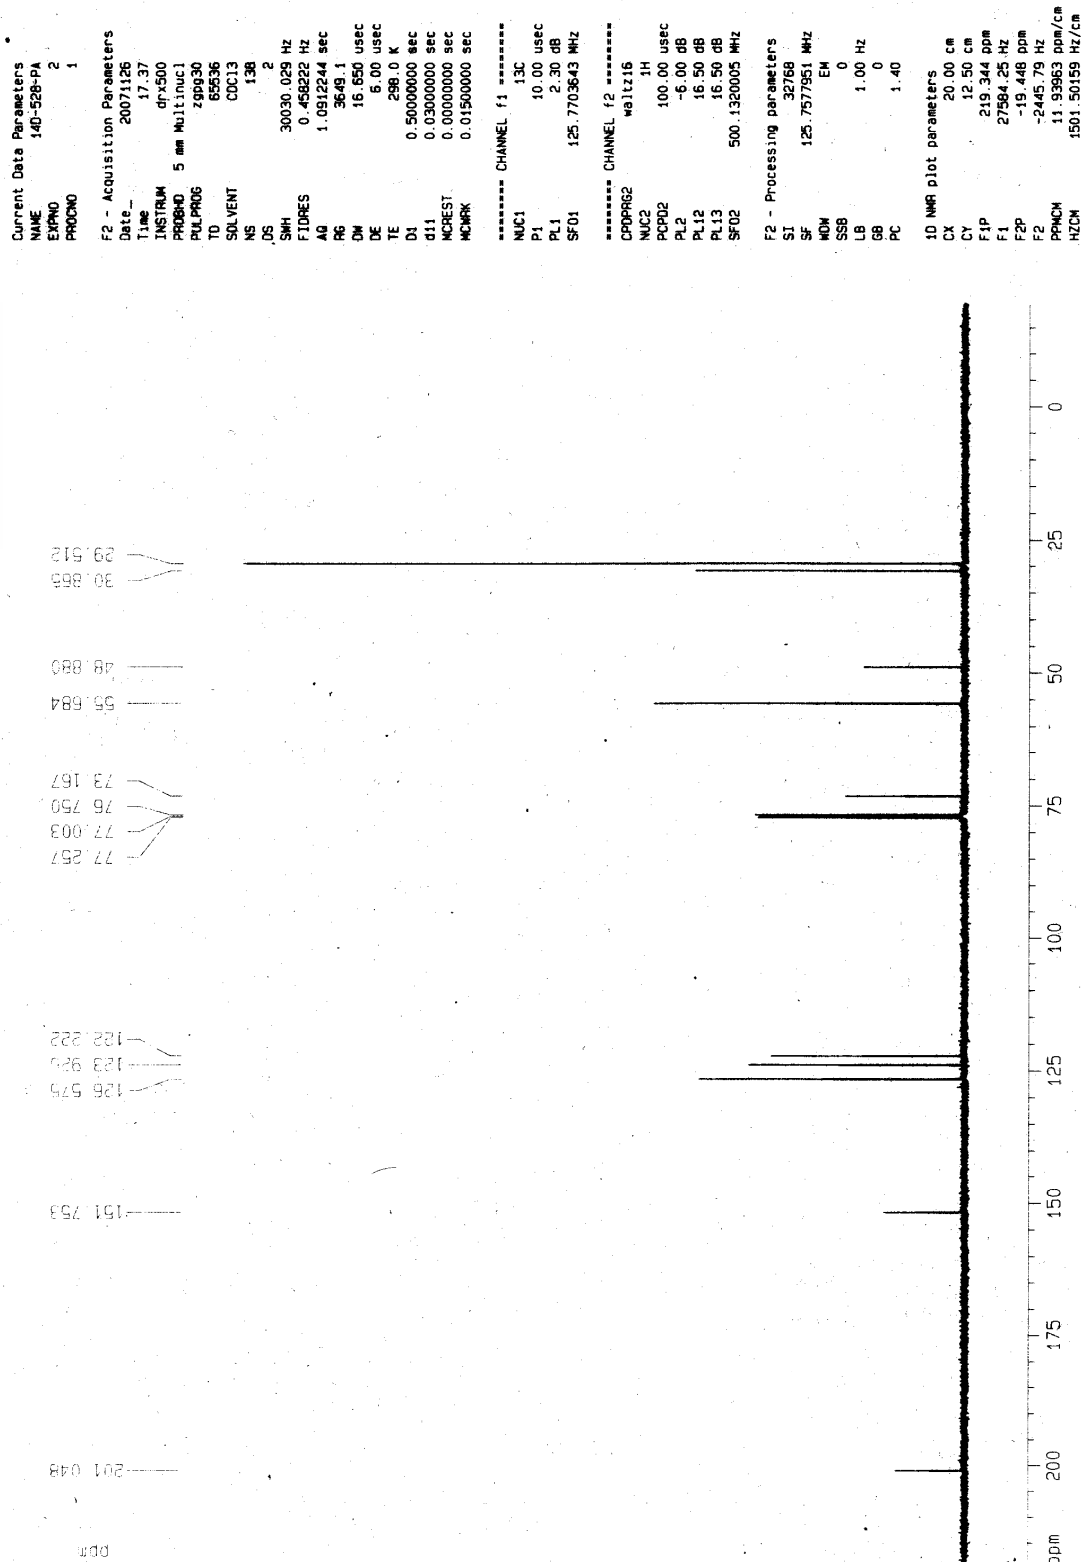

<sup>1</sup>H NMR (500 MHz, CDCl<sub>3</sub>) Spectrum of 4p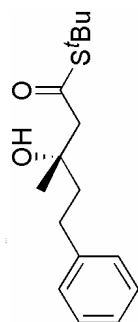

4p

Current Data Parameters  
 NAME 140-523-2A  
 EXPNO 1  
 PROCNO 1

F2 - Acquisition Parameters  
 Date\_ 20071219  
 Time 20:33  
 INSTRUM drx500  
 PROBO 5 mm Multinucl  
 PULPROG zg30  
 TD 65536  
 SOLVENT CDCl<sub>3</sub>  
 NS 32  
 DS 2  
 SMH 10330.578 Hz  
 FIDRES 0.157632 Hz  
 AQ 3.1719923 sec  
 RG 32  
 DM 48.400 usec  
 DE 6.00 usec  
 TE 297.5 K  
 D1 1.00000000 sec  
 MCREST 0.00000000 sec  
 MCWAK 0.01500000 sec

===== CHANNEL f1 =====  
 NUC1 1H  
 P1 10.00 usec  
 PL1 -6.00 dB  
 SF01 500.1330885 MHz

F2 - Processing parameters  
 SI 32768  
 SF 500.1300143 MHz  
 WDW EM  
 SSB 0  
 LB 0.30 Hz  
 GB 0  
 PC 1.00

1D NMR plot parameters  
 CX 20.00 cm  
 CY 12.50 cm  
 F1P 9.000 ppm  
 F1 4501.17 Hz  
 F2P 0.000 ppm  
 F2 0.00 Hz  
 PPMCM 0.45000 ppm/cm  
 HZCM 225.05849 Hz/cm

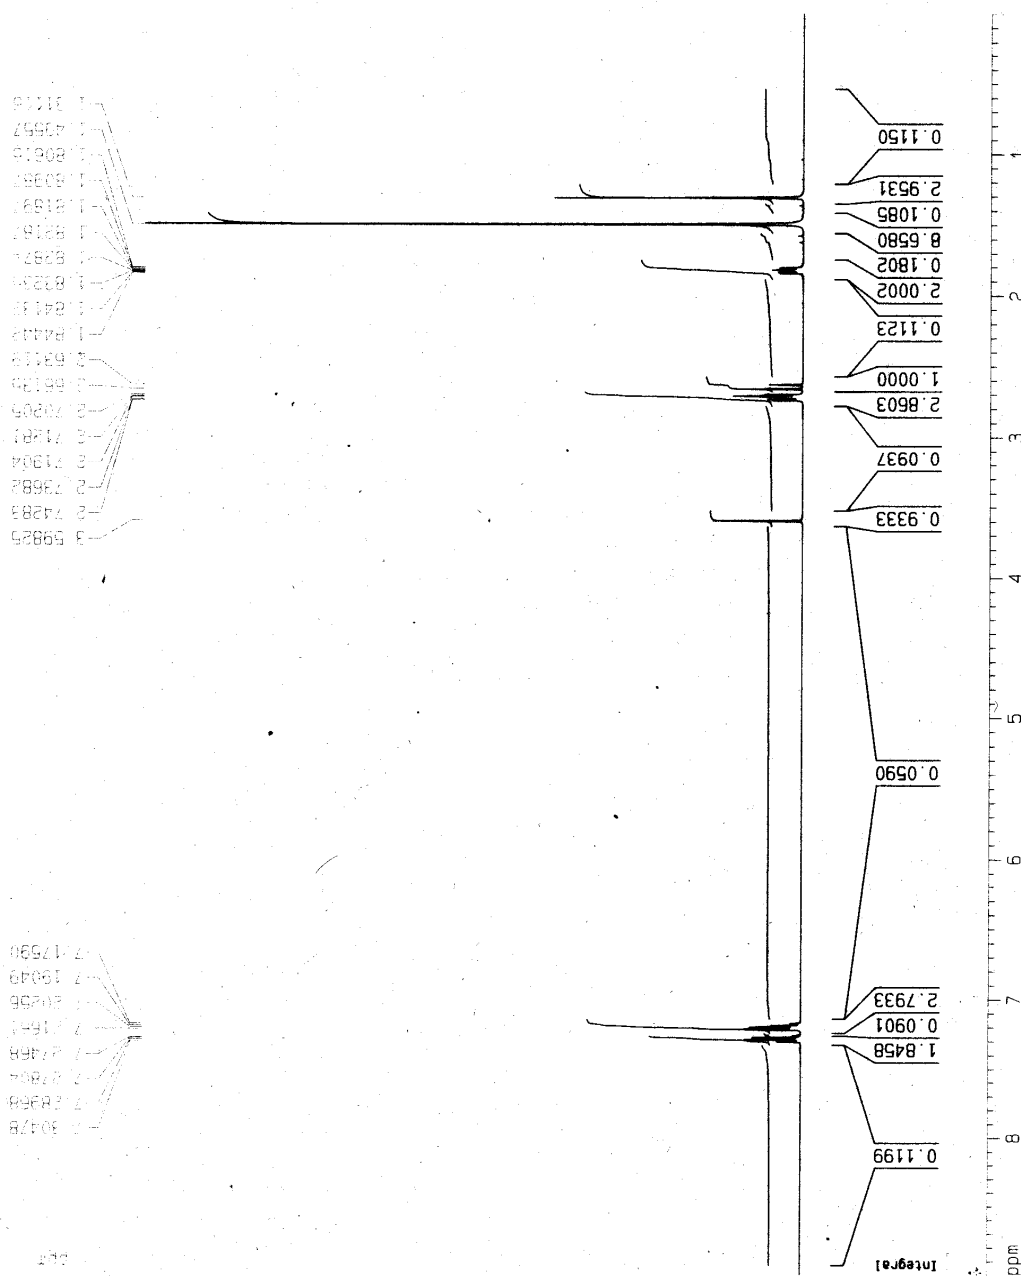

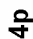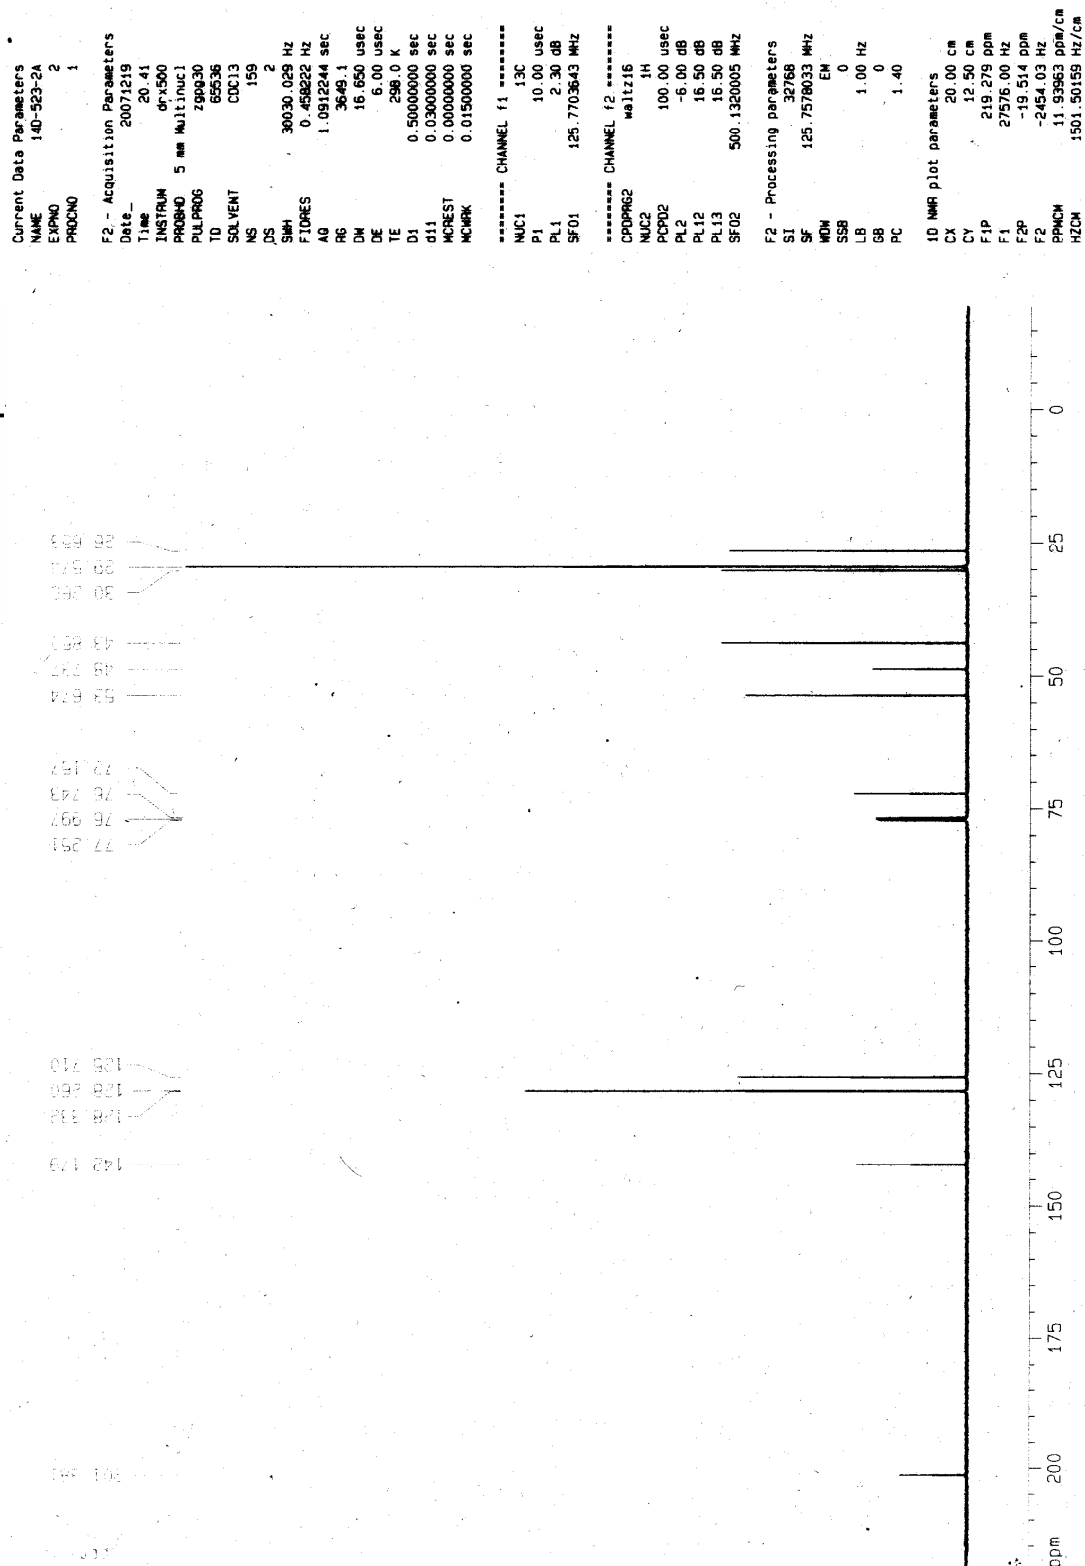

1

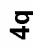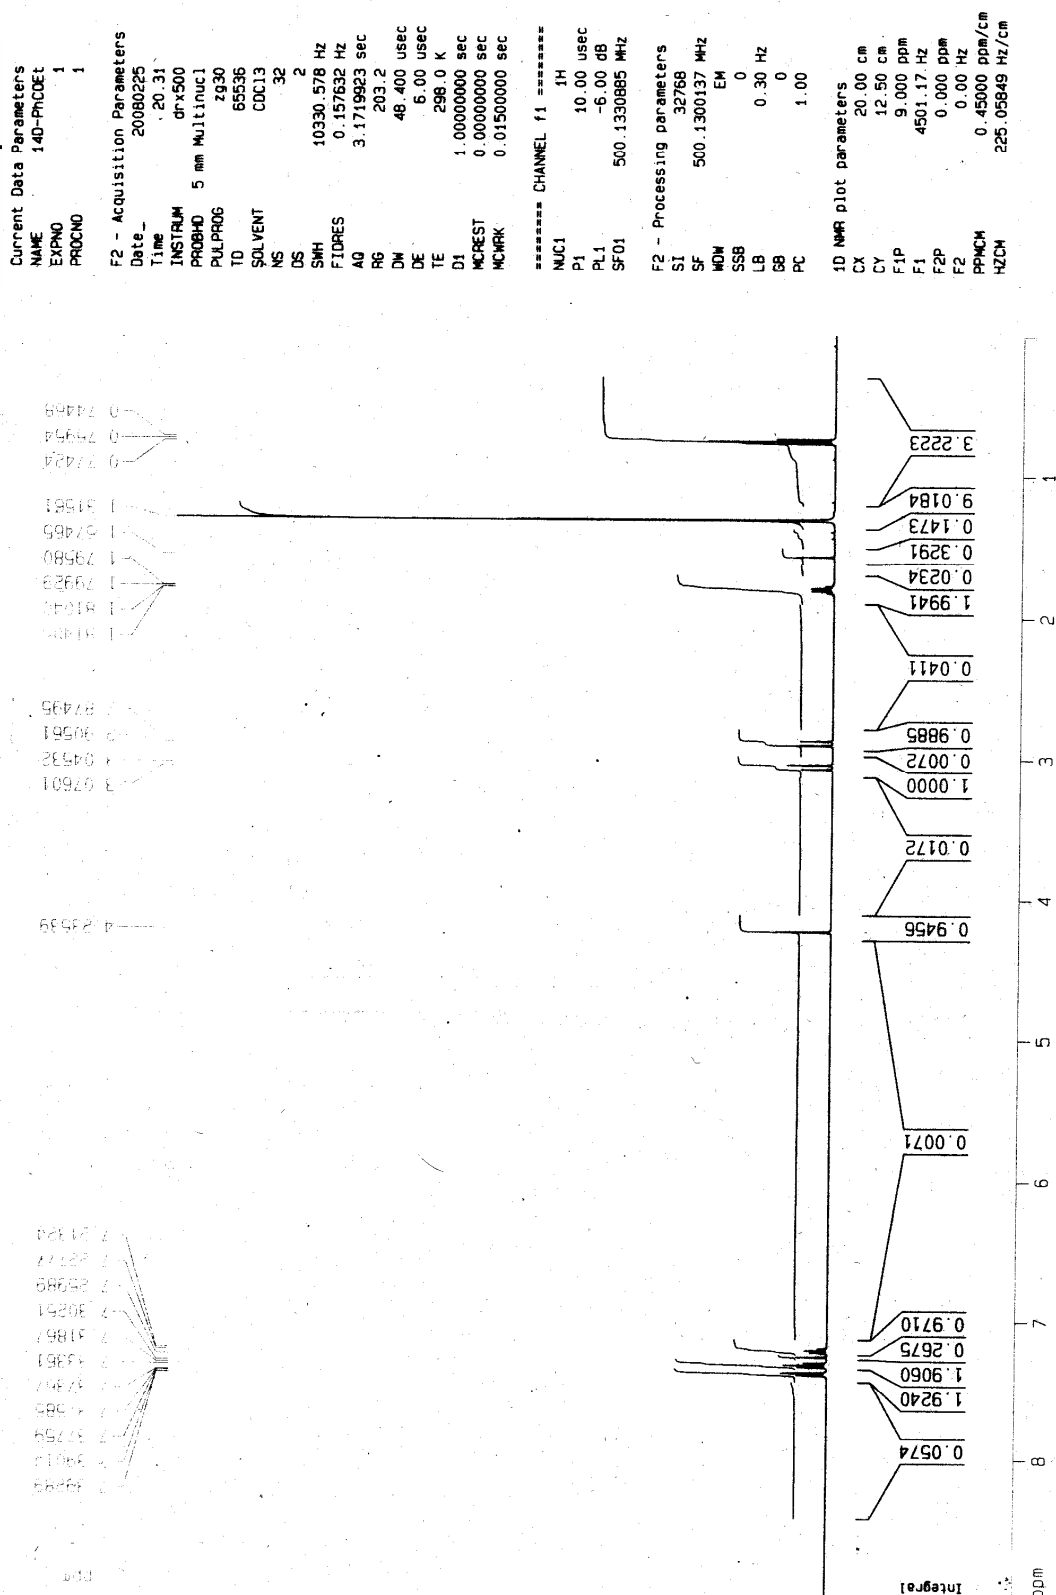



<sup>13</sup>C NMR (125.8 MHz, CDCl<sub>3</sub>) Spectrum of 4q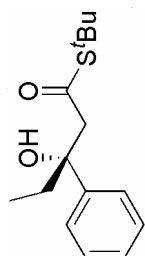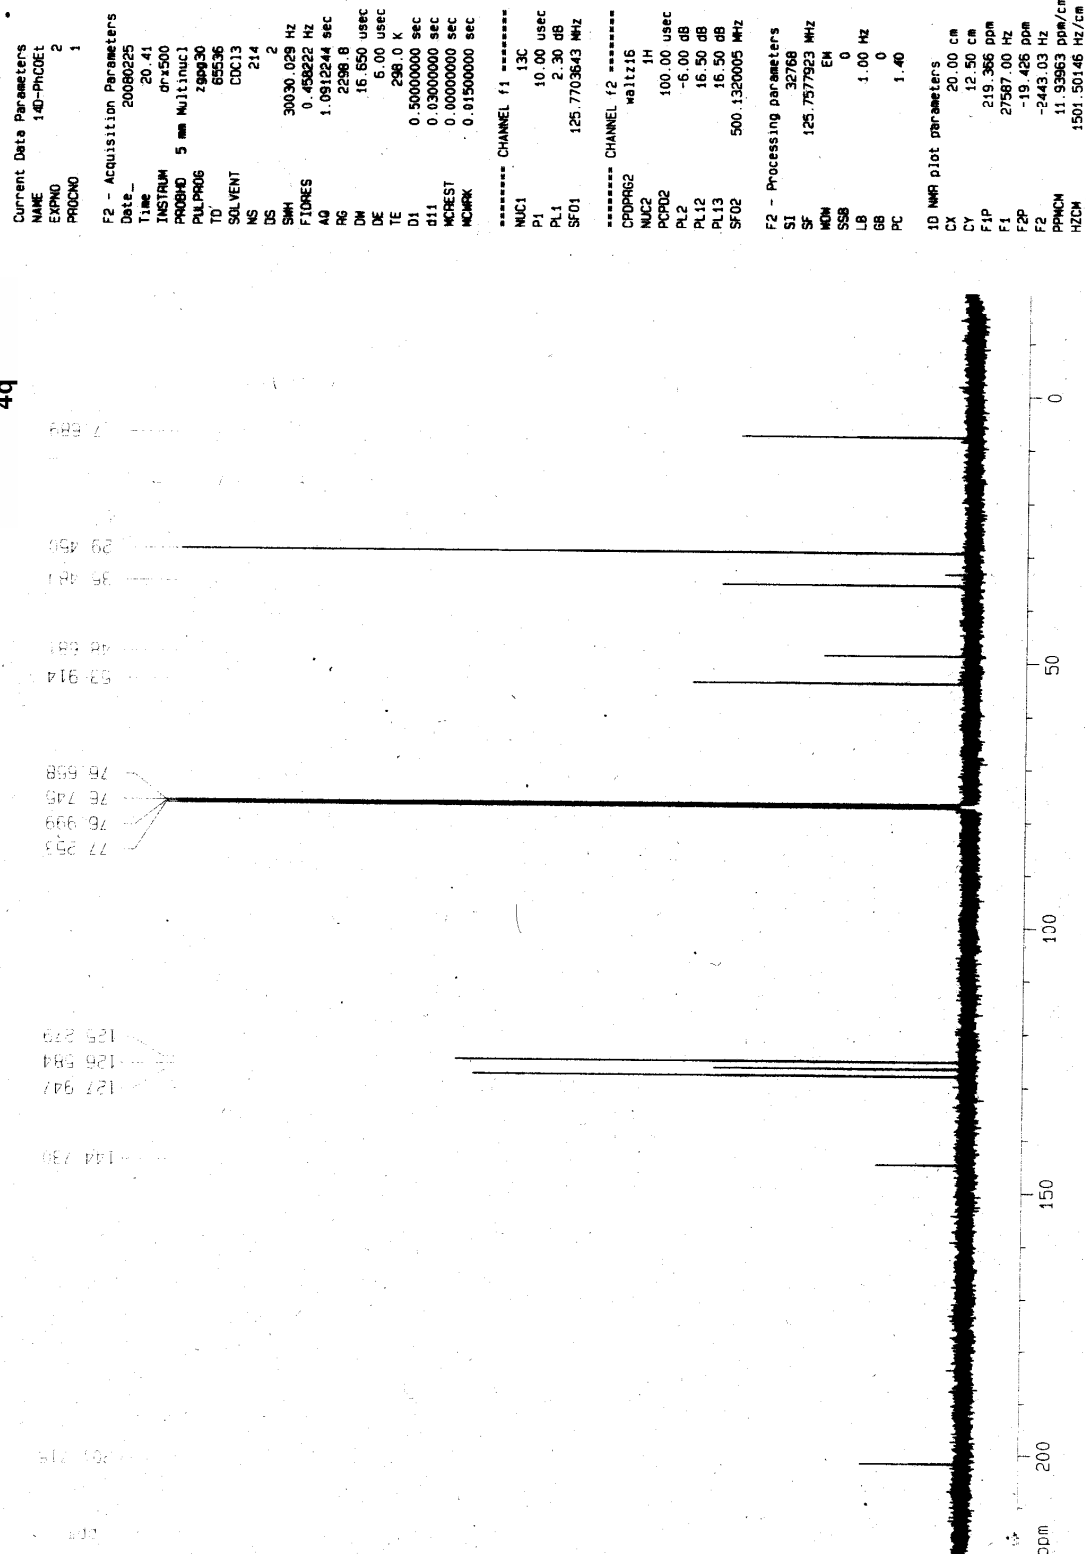

<sup>1</sup>H NMR (500 MHz, CDCl<sub>3</sub>) Spectrum of 11a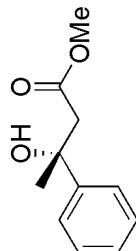

11a

NAME 140-531Me  
EXPNO 1  
PROCNO 1

F2 - Acquisition Parameters  
Date\_ 20071121  
Time 18 57  
INSTRUM gn500  
PROBHD 5 mm Multinuc1  
PULPROG zg30  
TD 65536  
SOLVENT CDCl3  
NS 16  
DS 2  
SWH 10330.578 Hz  
FIDRES 0.157632 Hz  
AQ 3.1719923 sec  
RG 80.6  
DM 48.400 usec  
DE 6.00 usec  
TE 298.0 K  
D1 1.00000000 sec  
MCREST 0.00000000 sec  
MCWRR 0.01500000 sec

===== CHANNEL f1 =====  
NUC1 1H  
P1 10.00 usec  
PL1 -6.00 dB  
SFO1 500.1330885 MHz

F2 - Processing parameters  
SI 32768  
SF 500.1300140 MHz  
WDW EM  
SSB 0  
LB 0.30 Hz  
GB 0  
PC 1.00

1D NMR plot parameters  
CX 20.00 cm  
CY 12.50 cm  
F1P 9.000 ppm  
F1 4501.17 Hz  
F2P 0.000 ppm  
F2 0.00 Hz  
PPMCM 0.45000 ppm/cm  
HZCM 225.05849 Hz/cm

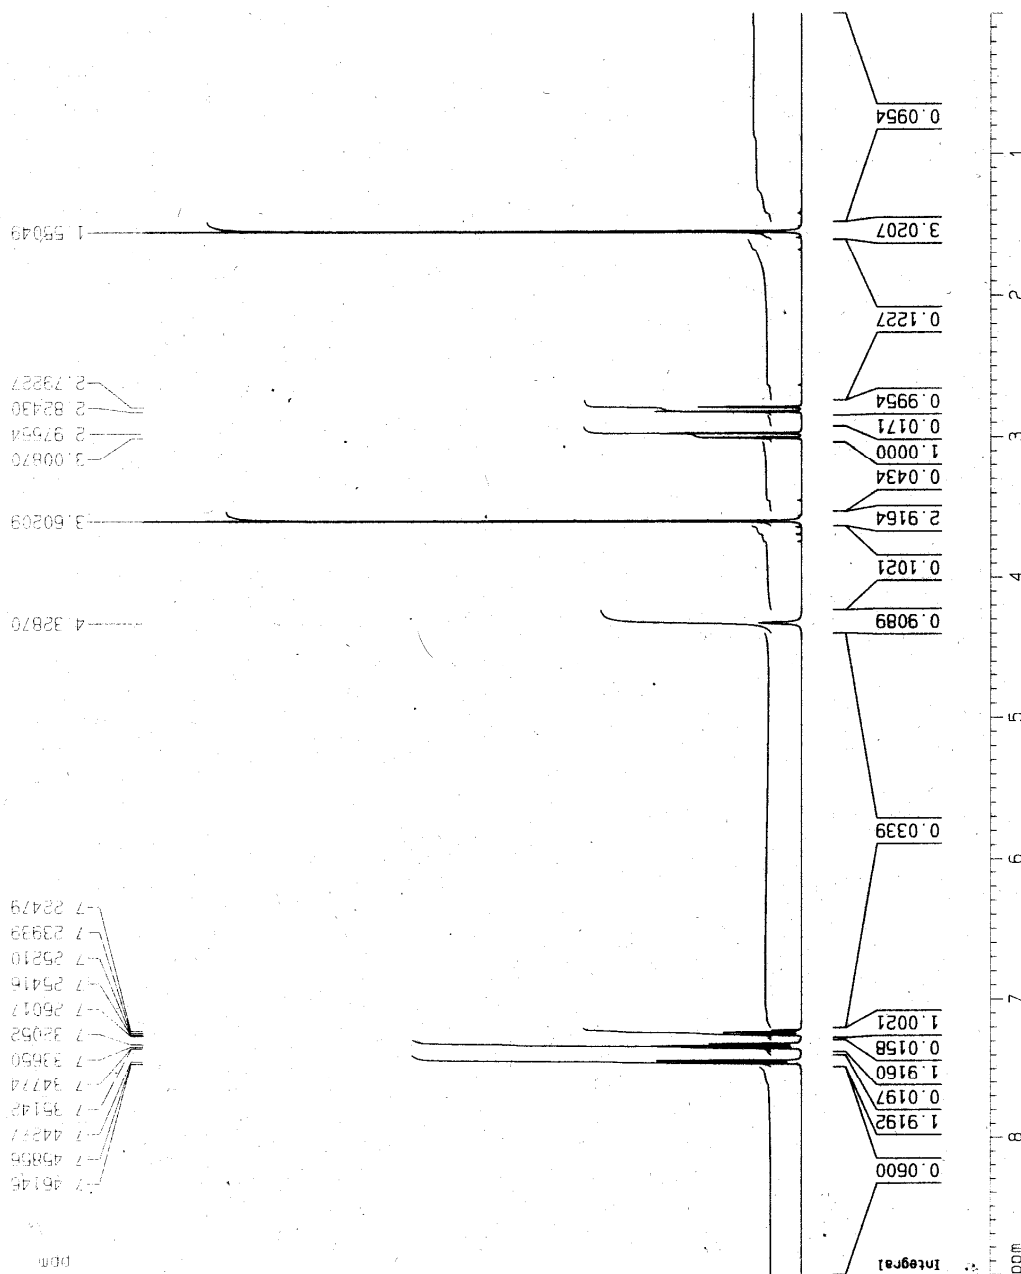

<sup>1</sup>H NMR (500 MHz, CDCl<sub>3</sub>) Spectrum of 11b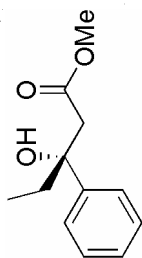

11b

Current Data Parameters  
 NAME 14D-529et  
 EXPNO 1  
 PROCNO 1

F2 - Acquisition Parameters  
 Date\_ 20071121  
 Time 18.43  
 INSTRUM drx500  
 PROBHD 5 mm Multinuc1  
 PULPROG zg30  
 TD 65536  
 SOLVENT CDCl3  
 NS 16  
 DS 2  
 SWH 10330.578 Hz  
 FIDRES 0.157632 Hz  
 AQ 3.1719923 sec  
 RG 181  
 DM 48.400 usec  
 DE 6.00 usec  
 TE 298.0 K  
 D1 1.00000000 sec  
 MCREST 0.00000000 sec  
 MCWRR 0.01500000 sec

===== CHANNEL f1 =====  
 NUC1 1H  
 P1 10.00 usec  
 PL1 -6.00 dB  
 SF01 500.1330885 MHz

F2 - Processing parameters  
 SI 32768  
 SF 500.1300143 MHz  
 WDW EM  
 SSB 0  
 LB 0.30 Hz  
 GB 0  
 PC 1.00

1D NMR plot parameters  
 CX 20.00 cm  
 CY 12.50 cm  
 F1P 9.000 ppm  
 F1 4501.17 Hz  
 F2P 0.000 ppm  
 F2 0.00 Hz  
 PPMCM 0.45000 ppm/cm  
 HZCM 225.05849 Hz/cm

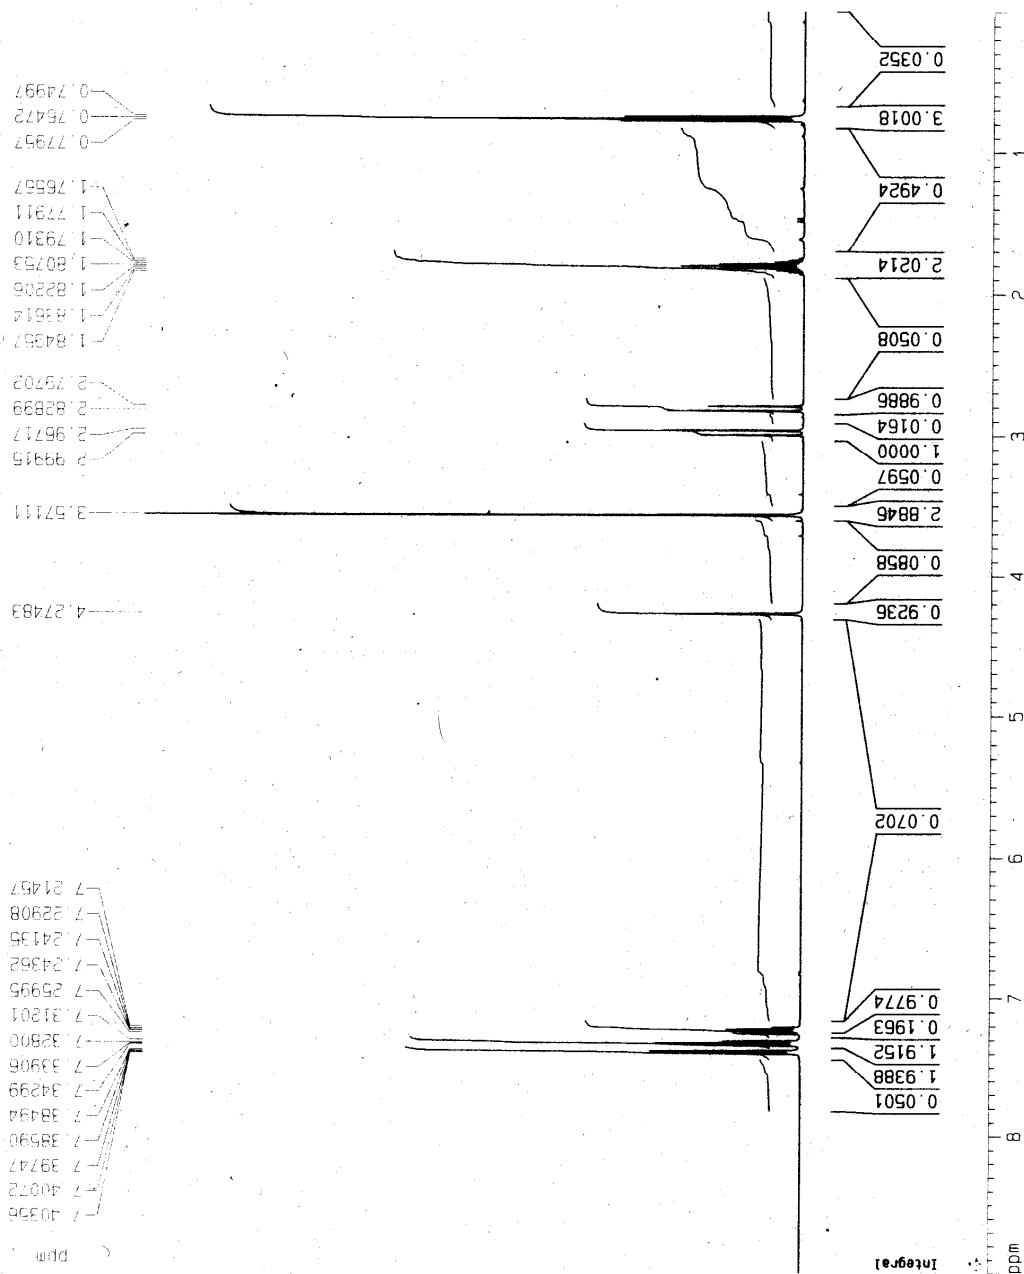

Supplement: Supplementary file 1 [file 4600858]
